# Supplementary material for: Trends in body mass index, overweight and obesity among adults in the USA, the NHANES from 2003 to 2018: a repeat cross-sectional survey
Source: PubMed Central journal article supplement — BMJ Open. 2022 Dec 16;12(12):e065425. doi: 10.1136/bmjopen-2022-065425 (PMC9764609; doi:10.1136/bmjopen-2022-065425), 2022-12-16
Supplement: bmjopen-2022-065425.draft_revisions.pdf [file bmjopen-2022-065425.draft_revisions.pdf]

# BMJ Open

BMJ Open is committed to open peer review. As part of this commitment we make the peer review history of every article we publish publicly available.

When an article is published we post the peer reviewers' comments and the authors' responses online. We also post the versions of the paper that were used during peer review. These are the versions that the peer review comments apply to.

The versions of the paper that follow are the versions that were submitted during the peer review process. They are not the versions of record or the final published versions. They should not be cited or distributed as the published version of this manuscript.

BMJ Open is an open access journal and the full, final, typeset and author-corrected version of record of the manuscript is available on our site with no access controls, subscription charges or pay-per-view fees (<http://bmjopen.bmj.com>).

If you have any questions on BMJ Open's open peer review process please email [info.bmjopen@bmj.com](mailto:info.bmjopen@bmj.com)

# BMJ Open

## Trends in body mass index, obesity and overweight among adults in the United States, NHANES 2003 to 2018

|                               |                                                                                                                                                                                                                                                                                                                                   |
|-------------------------------|-----------------------------------------------------------------------------------------------------------------------------------------------------------------------------------------------------------------------------------------------------------------------------------------------------------------------------------|
| Journal:                      | <i>BMJ Open</i>                                                                                                                                                                                                                                                                                                                   |
| Manuscript ID                 | bmjopen-2022-065425                                                                                                                                                                                                                                                                                                               |
| Article Type:                 | Original research                                                                                                                                                                                                                                                                                                                 |
| Date Submitted by the Author: | 03-Jun-2022                                                                                                                                                                                                                                                                                                                       |
| Complete List of Authors:     | Li, Mingxi; Beijing Rehabilitation Hospital, Department of Traditional Chinese Medicine Rehabilitation<br>Gong, Weijun; Beijing Rehabilitation Hospital<br>Wang, Shidong; Beijing University of Chinese Medicine Affiliated Dongzhimen Hospital<br>Li, Zhe; Beijing University of Chinese Medicine Affiliated Dongzhimen Hospital |
| Keywords:                     | PUBLIC HEALTH, General endocrinology < DIABETES & ENDOCRINOLOGY, EPIDEMIOLOGY                                                                                                                                                                                                                                                     |
|                               |                                                                                                                                                                                                                                                                                                                                   |

SCHOLARONE™  
Manuscripts

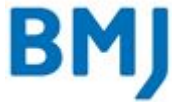

I, the Submitting Author has the right to grant and does grant on behalf of all authors of the Work (as defined in the below author licence), an exclusive licence and/or a non-exclusive licence for contributions from authors who are: i) UK Crown employees; ii) where BMJ has agreed a CC-BY licence shall apply, and/or iii) in accordance with the terms applicable for US Federal Government officers or employees acting as part of their official duties; on a worldwide, perpetual, irrevocable, royalty-free basis to BMJ Publishing Group Ltd ("BMJ") its licensees and where the relevant Journal is co-owned by BMJ to the co-owners of the Journal, to publish the Work in this journal and any other BMJ products and to exploit all rights, as set out in our [licence](#).

The Submitting Author accepts and understands that any supply made under these terms is made by BMJ to the Submitting Author unless you are acting as an employee on behalf of your employer or a postgraduate student of an affiliated institution which is paying any applicable article publishing charge ("APC") for Open Access articles. Where the Submitting Author wishes to make the Work available on an Open Access basis (and intends to pay the relevant APC), the terms of reuse of such Open Access shall be governed by a Creative Commons licence – details of these licences and which [Creative Commons](#) licence will apply to this Work are set out in our licence referred to above.

Other than as permitted in any relevant BMJ Author's Self Archiving Policies, I confirm this Work has not been accepted for publication elsewhere, is not being considered for publication elsewhere and does not duplicate material already published. I confirm all authors consent to publication of this Work and authorise the granting of this licence.

1  
2  
3  
4 **Trends in body mass index, obesity and overweight among adults in the United States, NHANES**

5  
6  
7 **2003 to 2018**

8  
9 **Authors:**

10  
11  
12 1. Mingxi Li<sup>1&</sup>, MM 2. Weijun Gong<sup>1&</sup>, PhD 3. Shidong Wang<sup>2</sup>, PhD 4. Zhe Li<sup>2</sup>, PhD

13  
14  
15 **Author's affiliations:**

16  
17  
18 1. Beijing Rehabilitation Hospital, Capital Medical University, Xixiazhuang Badachu Road,

19  
20  
21 Shijingshan District, 100144, Beijing, China

22  
23  
24 2. Dongzhimen Hospital, Beijing University of Chinese Medicine, No.5 Haiyuncang, Dongcheng

25  
26  
27 District, 100700, Beijing, China

28  
29 &These authors contributed equally to this work and should be considered co-first authors

30  
31  
32 **Corresponding Author:**

33  
34  
35 **Name:** Zhe Li

36  
37  
38 **Address:** Dongzhimen Hospital, Beijing University of Chinese Medicine, No.5 Haiyuncang,

39  
40  
41 Dongcheng District, 100700, Beijing, China

42  
43  
44 **Phone numbers:** +86-01084013293

45  
46  
47 **E-mail address:** lizhetcm@126.com

48  
49 **manuscript word count: 2916**

## Abstract

**Objectives:** To analyze detailed trends in adult obesity from 2003 through 2018, and provide latest national estimates of adult obesity 2017-2018.

**Design, Setting and Participants:** Analysis of data including measured height and weight obtained from 42,266 adults aged  $\geq 20$  years in the National Health and Nutrition Examination Survey, a cross-sectional, nationally representative sample of the US population.

**Exposure:** Survey period.

**Primary Outcome Measures:** The mean body mass index and the prevalence of obesity and overweight.

**Results:** In 2017-2018, the weighted mean(SE) body mass index was  $29.75 \pm 0.27$  kg/m<sup>2</sup> for men and  $29.96 \pm 0.37$  kg/m<sup>2</sup> for women. The prevalence of obesity (body mass index  $\geq 30$  kg/m<sup>2</sup>) was 43.3% (95% CI, 38.2%-48.4%) among men and 42.3% (95% CI, 38.6%-46.0%) among women. Over the 16-year period from 2003-2004 through 2017-2018, a significant increase of mean body mass index was found among both men and women (overall adjusted beta for 2017-2018 vs 2003-2004, 1.96 [95% CI, 1.34-2.57]). From 2003-2004 through 2017-2018, trends in obesity prevalence increased significantly among both men and women (overall adjusted odds ratio for 2017-2018 vs 2003-2004, 1.15 [95% CI, 1.10-1.21]). However, annual changes in mean body mass index, prevalence of obesity and overweight did not differ significantly before and after 2009-2010.

**Conclusions:** Although the prevalence of adult obesity continues to rise, there have been no significant changes in rising rate of adult obesity prevalence between 2003-2004 and 2017-2018. In 2017-2018, the prevalence of obesity was 43.3% among adult men and 42.3% among adult women.

**Keywords:** American adults; body mass index; obesity/overweight; trends; NHANES

1  
2  
3  
4 **Strengths and limitations of this study**  
5

6 1. Our present study used a larger sample size as well as a longer time span.  
7

8  
9 2. Our study assessed annual change in BMI and obesity, and the potential effects of financial crisis  
10  
11 around 2009 among US adults.  
12

13  
14 3. Obesity was defined mainly based on measurements of BMI, which does not measure body fat  
15  
16 directly.  
17

18  
19  
20  
21  
22  
23  
24  
25  
26  
27  
28  
29  
30  
31  
32  
33  
34  
35  
36  
37  
38  
39  
40  
41  
42  
43  
44  
45  
46  
47  
48  
49  
50  
51  
52  
53  
54  
55  
56  
57  
58  
59  
60

For peer review only

## 1. Introduction

Obesity is one of most common risk factor for chronic diseases such as diabetes mellitus, cardiovascular diseases, renal damage and cancers that affects 670 million adults globally in 2016<sup>1-7</sup>. In the United States, obesity rates has been on the rise since the 1980s<sup>8</sup>. By 2030, obesity is expected to reach a prevalence of 48.9% among American adults<sup>9</sup>.

Some studies have reported on trends in obesity prevalence among American adults using the National Health and Nutrition Examination Survey (NHANES) data<sup>8 10-19</sup>. Between 1976-1980 and 1988-1994, obesity prevalence among American adults increased from 14.5% to 22.5%<sup>10</sup>. The prevalence of obesity increasing from 22.9% to 30.5% form 1988-1994 through 1999-2000, maintaining similar growth rates of about 8%<sup>11</sup>. Over the period 1999-2000 to 2017-2018, there were larger changes in the prevalence among men (from 27.5% to 43.0%) than seen previously and similar growth in prevalence among women (from 33.4% to 41.9%).<sup>14</sup> Most of the previous studies focused on differences in prevalence of obesity by age, sex and race. The differences in prevalence of obesity by other covariates such as educational status, economic status, physical activity status have been scarcely studied.

In this study, we aimed to provide the latest national estimates of adult obesity and evaluate trends in mean body mass index(BMI) and adult obesity between 2003-2004 and 2017-2018. We also focus on the changes of mean BMI and adult obesity before and after 2009 ( The 2008–2009 global financial crisis taken place). In addition, we assess how these trends might vary by age, sex, race, educational status, economic status and physical activity status.

## 2. Materials and methods

### 2.1 Database and participants

1  
2  
3  
4 The NHANES is a nationally representative sample of United States population, which collects  
5  
6 data from survey participants through household interviews, standardized physical examinations, and  
7  
8 laboratory tests in mobile examination centers<sup>20</sup>. The NHANES released data every 2 years to ensure  
9  
10 adequate sample size for analyses and protect confidentiality. Detailed information on the NHANES  
11  
12 procedures is available in the literature.<sup>21</sup>  
13  
14  
15

16  
17 The present study used NHANES data including adults aged  $\geq 20$  years ( $N = 44,790$ ) collected  
18  
19 between 2003-2004 and 2017-2018 with 8 survey cycles. Among the 44,790 participants (21,668 men  
20  
21 and 23,122 women), 42,266 had complete data on BMI, who were included in the final analysis.  
22  
23

## 24 25 *2.2 Data collection*

26  
27 Information about anthropometric measurements (including height and weight) and BMI was  
28  
29 obtained from examination data. Information about age, sex, race, education, poverty income ratio  
30  
31 (PIR) was obtained from demographics data. Data on total energy intake was obtained from the total  
32  
33 nutrient intakes file (second day dietary interview), which contains a summary of an individual's  
34  
35 nutrition from all foods and beverages provided on the dietary recall. PIR was a ratio of family income  
36  
37 to poverty threshold, which was calculated by dividing family income by the poverty guidelines for the  
38  
39 survey year. PIR was categorized into two groups:  $<130\%$  and  $\geq 130\%$ . This classification of PIR has  
40  
41 been used in a previous study.<sup>22</sup> Data on physical activity was obtained from through the physical  
42  
43 activity questionnaire. Based on the 2018 Physical Activity Guidelines for Americans, respondents  
44  
45 who engaged in moderate-intensity aerobic activity for 150 min/week or vigorous-intensity aerobic  
46  
47 activity for 75 min/week, or an equivalent combination of both (1 min of vigorous-intensity physical  
48  
49 activity is equivalent to 2 min of moderate intensity physical activity) were defined as meeting the  
50  
51 guidelines.<sup>23</sup> In our analysis, physical activity was categorized into three levels: sufficiently active,  
52  
53  
54  
55  
56  
57  
58  
59  
60



1  
2  
3  
4 insufficiently active and inactive. Sufficiently active was defined as moderate-intensity aerobic activity  
5  
6 for 150 min/week or vigorous-intensity aerobic activity for 75 min/week, or an equivalent combination  
7  
8 of both. Insufficiently active was defined as some aerobic activity but not enough to meet the  
9  
10 guidelines(10-149 min/week). Inactive was defined as some physical activity (< 10 min/week) or  
11  
12 reported no physical activity.<sup>23</sup> This classification of physical activity has been used in previous  
13  
14 studies.<sup>24</sup>

### 19 2.3 Statistical analysis

22 According to WHO classification, we defined obesity as BMI  $\geq 30$  kg/m<sup>2</sup> and overweight as BMI  
23  
24  $\geq 25$  kg/m<sup>2</sup>. Overall, the mean BMI and prevalence of obesity and overweight in each survey cycle  
25  
26 were calculated incorporating sample weights and adjusted for clusters and strata of the complex  
27  
28 sample design of the NHANES. Individuals with missing demographic information on height or weight  
29  
30 measurements are excluded from the analyses.

35 In table 1, continuous variables were presented as weighted means and standard errors, while  
36  
37 categorical variables were presented as unweighted counts and weighted proportions. Comparisons  
38  
39 between survey cycles were made using the wald-test (categorical variables) or Kruskal-Wallis rank-  
40  
41 sum test (skewed distribution).

45 We used survey-weighted generalized linear regression models to evaluate the trends in BMI,  
46  
47 obesity and overweight by survey period. Multivariate survey-weighted generalized linear regression  
48  
49 models were adjusted for age, sex, race, education, PIR and activity status. A p-value for trend was  
50  
51 obtained by entering the median value of each category of BMI, prevalence of overweight and obesity  
52  
53 as a continuous variable in the models, and rerunning the corresponding survey-weighted generalized  
54  
55 linear regression models.

1  
2  
3  
4 We used a previously described method to compare trends in mean BMI, obesity and overweight  
5  
6 before and after 2009-2010 to explore the potential impact on financial crisis around 2008.<sup>25</sup> We  
7  
8  
9 calculated mean BMI annual changes as the absolute value of difference in mean BMI between the start  
10  
11 and end years divided by total number of years covered. We also calculated the annual relative changes  
12  
13 in obesity and overweight prevalence as the absolute value of difference in prevalence between the start  
14  
15 and end years divided by the prevalence in the start year annualised by accounting for compounding.  
16  
17  
18 Welch's t tests were used to compare trends in mean BMI, obesity and overweight before and after  
19  
20 2009-2010.  
21  
22  
23

24  
25 All simulations and analyses were performed using R software (R Foundation for Statistical  
26  
27 Computing, Vienna, Austria, Version 3.6.3) and the "survey" package (e.g., svymean and svyglm),  
28  
29 which considers sampling weights (16-year exam weight), clustering, and stratification of the complex  
30  
31 survey design.<sup>26</sup> A two-sided p value <0.05 was considered to be statistically significant.  
32  
33  
34

#### 35 *2.4 Patient and Public Involvement*

36  
37 Approval was obtained from the National Center for Health Statistics Research Ethics Review  
38  
39 Board, and all participants provided written informed consent. Therefore there was no need for any  
40  
41 ethical consent in this study.  
42  
43  
44

### 45 **3.Results**

46  
47 The demographic characteristics of all participants according to survey year cycles are listed in  
48  
49 Table 1. In total, 42,266 participants (20,408 men and 21,858 women) were included for our final  
50  
51 analysis. The mean (SE) age of the weighted population was 47.11 (0.20) years, 47.97% of the  
52  
53 population were men, and the weighted mean (SE) BMI was 28.93 (0.07) kg/m<sup>2</sup>. Approximately two-  
54  
55 thirds (67.36%) were Non-Hispanic White, 11.41% were Non-Hispanic Black, 8.38% were Mexican  
56  
57  
58  
59  
60

1  
2  
3  
4 American, 5.33% were Hispanic and 7.51% were other race. More than 80% had a minimum of a high  
5  
6 school education. Approximately 80% reported good economic status ( $PIR \geq 130\%$ ). About 65%  
7  
8 reported meeting physical activity guidelines. The prevalence of obesity and overweight increased  
9  
10 overtime, whereas the inverse was true for normal weight ( $p = 0.002$ ).  
11  
12  
13  
14  
15  
16  
17  
18  
19  
20  
21  
22  
23  
24  
25  
26  
27  
28  
29  
30  
31  
32  
33  
34  
35  
36  
37  
38  
39  
40  
41  
42  
43  
44  
45  
46  
47  
48  
49  
50  
51  
52  
53  
54  
55  
56  
57  
58  
59  
60

For peer review only

**Table 1. Baseline characteristics of participants.\***

| Characteristics       | National Health and Nutrition Examination Survey cycles † |                          |                          |                          |                          |                          |                          |                          |                          |
|-----------------------|-----------------------------------------------------------|--------------------------|--------------------------|--------------------------|--------------------------|--------------------------|--------------------------|--------------------------|--------------------------|
|                       | Total<br>(n= 42,266)                                      | 2003/2004<br>(n = 4,647) | 2005/2006<br>(n = 4,680) | 2007/2008<br>(n = 5,607) | 2009/2010<br>(n = 5,994) | 2011/2012<br>(n = 5,237) | 2013/2014<br>(n = 5,520) | 2015/2016<br>(n = 5,406) | 2017/2018<br>(n = 5,175) |
| Age, years            | 47.11 ± 0.20                                              | 46.02 ± 0.52             | 46.42 ± 0.74             | 46.55 ± 0.44             | 46.92 ± 0.49             | 47.21 ± 0.82             | 47.45 ± 0.38             | 47.92 ± 0.58             | 48.14 ± 0.53             |
| Age, years (group)    |                                                           |                          |                          |                          |                          |                          |                          |                          |                          |
| 20 - 30               | 8,033 (20.5)                                              | 940 (21.0)               | 1,101 (20.5)             | 928 (20.5)               | 1,134 (21.1)             | 1,043 (20.6)             | 1,025 (20.6)             | 1,016 (20.2)             | 846 (19.7)               |
| 30 - 39               | 7,175 (18.4)                                              | 759 (20.3)               | 823 (19.8)               | 997 (19.1)               | 1,010 (18.1)             | 916 (17.5)               | 951 (17.4)               | 921 (17.4)               | 798 (19.0)               |
| 40 - 49               | 7,035 (19.4)                                              | 742 (21.6)               | 782 (21.2)               | 920 (21.2)               | 1,063 (19.8)             | 869 (19.4)               | 991 (18.9)               | 896 (17.7)               | 772 (16.3)               |
| 50 - 59               | 6,714 (18.1)                                              | 596 (16.6)               | 622 (16.9)               | 902 (17.8)               | 956 (18.2)               | 877 (18.9)               | 914 (18.1)               | 917 (18.8)               | 930 (19.3)               |
| 60 - 69               | 6,629 (12.8)                                              | 695 (10.2)               | 631 (11.0)               | 894 (11.0)               | 876 (12.0)               | 820 (13.5)               | 866 (14.1)               | 863 (14.5)               | 984 (15.1)               |
| ≥ 70                  | 6,680 (10.8)                                              | 915 (10.5)               | 721 (10.3)               | 966 (10.5)               | 955 (10.8)               | 712 (10.1)               | 773 (11.0)               | 793 (11.4)               | 845 (11.6)               |
| Sex, n (%)            |                                                           |                          |                          |                          |                          |                          |                          |                          |                          |
| Male, n (%)           | 20,408 (48.0)                                             | 2,237 (48.1)             | 2,237 (48.2)             | 2,746 (48.0)             | 2,889 (48.1)             | 2,585 (48.1)             | 2,638 (48.0)             | 2,638 (47.6)             | 2,493 (47.7)             |
| Female, n (%)         | 21,858 (52.0)                                             | 2,410 (51.9)             | 2,443 (51.8)             | 2,861 (52.0)             | 3,105 (51.9)             | 4,652 (51.9)             | 2,882 (52.0)             | 2,882 (52.4)             | 2,682 (52.3)             |
| Race                  |                                                           |                          |                          |                          |                          |                          |                          |                          |                          |
| Mexican American      | 6,805 (8.4)                                               | 931 (8.0)                | 944 (8.0)                | 967(8.3)                 | 1,096 (8.6)              | 509 (7.7)                | 737 (9.1)                | 936 (8.8)                | 685 (8.7)                |
| Other Hispanic        | 3,755 (5.3)                                               | 139 (3.5)                | 148 (3.4)                | 629 (4.9)                | 610 (5.0)                | 538 (6.5)                | 488 (5.6)                | 720 (6.4)                | 483 (6.9)                |
| Non-Hispanic White    | 18,120 (67.4)                                             | 2,464 (72.0)             | 2,338 (71.9)             | 2,625 (69.6)             | 2,865 (67.9)             | 1,917 (66.5)             | 2,366 (65.9)             | 1,767 (64.0)             | 1,778 (62.4)             |
| Non-Hispanic Black    | 9,094 (11.4)                                              | 910 (11.2)               | 1,064 (11.4)             | 1,155 (11.2)             | 1,087 (11.4)             | 1,382 (11.5)             | 1,135 (11.5)             | 1,142 (11.4)             | 1,219 (11.5)             |
| Other Race            | 4,492 (7.5)                                               | 203 (5.4)                | 186 (5.2)                | 231 (6.1)                | 336 (7.2)                | 891 (7.7)                | 794 (7.9)                | 841 (9.4)                | 1,010 (10.5)             |
| Education, n (%)      |                                                           |                          |                          |                          |                          |                          |                          |                          |                          |
| Less than high school | 10,814 (16.4)                                             | 1,362 (18.1)             | 1,290 (17.4)             | 1,728 (20.3)             | 1,710 (18.9)             | 1,235 (16.4)             | 1,191 (15.2)             | 1,277 (14.3)             | 1,021 (11.0)             |
| High school graduate  | 9,787 (23.6)                                              | 1,167 (27.1)             | 1,119 (25.0)             | 1,392 (25.4)             | 1,376 (22.9)             | 1,098 (19.8)             | 1,232 (21.6)             | 1,172 (20.8)             | 1,231 (27.0)             |

|    |                                |               |                |                |               |               |               |               |               |               |
|----|--------------------------------|---------------|----------------|----------------|---------------|---------------|---------------|---------------|---------------|---------------|
| 1  |                                |               |                |                |               |               |               |               |               |               |
| 2  |                                |               |                |                |               |               |               |               |               |               |
| 3  |                                |               |                |                |               |               |               |               |               |               |
| 4  |                                |               |                |                |               |               |               |               |               |               |
| 5  | Some college or AA degree      | 12,266 (31.4) | 1,263 (31.5)   | 1,334 (31.3)   | 1,440 (29.0)  | 1,679 (30.3)  | 1,576 (32.4)  | 1,704 (32.9)  | 1,602 (32.5)  | 1,668 (30.8)  |
| 6  | College graduate or above      | 9,345 (28.6)  | 847 (23.2)     | 931 (26.1)     | 1,041 (25.3)  | 1,216 (27.7)  | 1,324 (31.3)  | 1,389 (30.3)  | 1,352 (32.4)  | 1,245 (31.1)  |
| 7  | Poverty income ratio, n (%)    |               |                |                |               |               |               |               |               |               |
| 8  | < 130%                         | 12,129 (21.3) | 1,264 (20.5)   | 1,167 (17.1)   | 1,552 (20.4)  | 1,817 (21.7)  | 1,724 (24.6)  | 1,762 (24.7)  | 1,568 (20.9)  | 1,275 (20.1)  |
| 9  | ≥ 130%                         | 26,450 (78.7) | 3,119 (79.5)   | 3,294 (82.9)   | 3,536 (79.6)  | 3,592 (78.3)  | 3,078 (75.4)  | 3,335 (75.3)  | 3,280 (79.1)  | 3,216 (79.9)  |
| 10 | BMI, kg/m <sup>2</sup>         | 28.93 ± 0.07  | 28.24 ± 0.15   | 28.57 ± 0.23   | 28.54 ± 0.16  | 28.75 ± 0.13  | 28.73 ± 0.21  | 29.17 ± 0.17  | 29.42 ± 0.25  | 29.86 ± 0.26  |
| 11 | BMI, kg/m <sup>2</sup> (group) |               |                |                |               |               |               |               |               |               |
| 12 | < 25                           | 12,522 (30.7) | 1,480 (33.7)   | 1,432 (32.9)   | 1,628 (32.0)  | 1,684 (30.9)  | 1,714 (31.7)  | 1,700 (30.0)  | 1,517 (28.7)  | 1,367 (26.9)  |
| 13 | 25 - 30                        | 14,046 (32.9) | 1,632 (34.1)   | 1,608 (32.9)   | 1,934 (34.3)  | 2,030 (33.4)  | 1,677 (33.8)  | 1,767 (32.6)  | 1,731 (31.9)  | 1,667 (30.8)  |
| 14 | ≥ 30                           | 15,698 (36.4) | 1,535 (32.2)   | 1,640 (34.2)   | 2,045 (33.7)  | 2,280 (35.8)  | 1,846 (34.6)  | 2,053 (37.4)  | 2,158 (39.4)  | 2,141 (42.3)  |
| 15 | Total energy intake, Kcal/d    | 2,027.31±7.96 | 2,113.90±13.81 | 2,051.01±25.07 | 2016.62±20.87 | 2061.43±27.10 | 2014.61±18.59 | 2017.22±23.24 | 1970.20±23.28 | 1980.34±23.18 |
| 16 | Physical activity, n (%)       |               |                |                |               |               |               |               |               |               |
| 17 | Inactive                       | 8,504 (18.1)  | 150 (5.6)      | 142 (4.4)      | 1,656 (23.1)  | 1,711 (23.7)  | 355 (6.8)     | 1,562 (26.3)  | 1,565 (23.0)  | 1,363 (21.2)  |
| 18 | Insufficiently active          | 6,649 (17.5)  | 1,380 (50.2)   | 1,403 (47.5)   | 734 (13.0)    | 817 (13.7)    | 536 (10.3)    | 568 (9.7)     | 567 (9.9)     | 644 (11.3)    |
| 19 | Sufficiently active            | 23,320 (64.4) | 1,156 (44.2)   | 1,303 (48.2)   | 3,217 (63.8)  | 3,466 (62.7)  | 4,346 (82.9)  | 3,390 (64.0)  | 3,274 (67.1)  | 3,168 (67.5)  |

25 \* Data are presented incorporating sample weights and adjusted for clusters and strata of the complex sample design of the National Health and Nutrition Examination Survey  
 26  
 27  
 28 (2003-2018).

30 † Values are presented as mean ± SE for continuous variables and unweighted numbers (weighted %) for categorical variables.

33 Abbreviations: AA, Associate of Arts; BMI, body mass index; CI, confidence interval.

1  
2  
3  
4 The mean(SE) BMI levels rose from 28.24 (0.07) kg/m<sup>2</sup> in 2003-2004 to 29.86(0.26) kg/m<sup>2</sup> in  
5  
6 2017-2018 (Table S1). In 2017-2018, the obesity prevalence was 42.8% (95% CI 39.5-46.1), increasing  
7  
8 more than 10% compared with 2003-2004 (32.3%, 95% CI 29.9-34.6) (Table S2). Consistent with the  
9  
10 increase in mean BMI and obesity prevalence, we found that the prevalence of overweight rose from  
11  
12 66.3% (95% CI 64.4-68.3) in 2003-2004 to 73.8 (95% CI 71.1-76.4) in 2017-2018 (Table S3). We used  
13  
14 survey-weighted generalized linear regression models to evaluate the trends in BMI, obesity and  
15  
16 overweight by survey period (Table 2). Compared with 2003-2004, the mean (SE) BMI increased by  
17  
18 1.96 kg/m<sup>2</sup> (95% CI 1.34-2.57,  $p < .001$ ) in 2017-2018 after adjusting for age, sex, race, education, PIR  
19  
20 and activity status (Table 2, Table S4). The findings were similar for the prevalence of obesity and  
21  
22 overweight. Compared with 2003-2004, the adjusted odd ratios for the prevalence of obesity and  
23  
24 overweight were 1.15 (95% CI 1.10-1.21,  $p < .001$ ) and 1.08 (95% CI 1.04-1.13,  $p < .001$ ), respectively  
25  
26 (Table 2, Table S5, Table S6). However, we found no significant effect of survey cycle on the  
27  
28 prevalence of overweight among men after adjusting for potential confounding variables (adjusted odd  
29  
30 ratio 1.05, 95%CI 1.00-1.11,  $p = 0.050$ ) (Table S6).  
31  
32  
33  
34  
35  
36  
37  
38  
39  
40  
41  
42  
43  
44  
45  
46  
47  
48  
49  
50  
51  
52  
53  
54  
55  
56  
57  
58  
59  
60

**Table 2. Change in BMI, obesity and overweight overtime among adults in the United States, 2003-2018**

| Years              | Mean BMI                      |         | Prevalence of obesity    |         | Prevalence of overweight |         |
|--------------------|-------------------------------|---------|--------------------------|---------|--------------------------|---------|
|                    | Adjusted $\beta$ *<br>(95%CI) | p-value | Adjusted OR *<br>(95%CI) | p-value | Adjusted OR *<br>(95%CI) | p-value |
| <b>2003 - 2004</b> | Reference                     |         | Reference                |         | Reference                |         |
| <b>2005 - 2006</b> | 0.38 (-0.23,0.99)             | 0.215   | 1.03 (0.99, 1.07)        | 0.184   | 1.01 (0.97, 1.05)        | 0.598   |
| <b>2007 - 2008</b> | 0.48 (0.04,0.93)              | 0.035   | 1.03 (1.00, 1.06)        | 0.084   | 1.02 (0.98, 1.05)        | 0.281   |
| <b>2009 - 2010</b> | 0.70 (0.26,1.15)              | 0.002   | 1.06 (1.03, 1.09)        | <0.001  | 1.03 (0.99, 1.07)        | 0.178   |
| <b>2011 - 2012</b> | 1.08 (0.55, 1.61)             | <0.001  | 1.07 (1.03, 1.11)        | <0.001  | 1.05 (1.00, 1.09)        | 0.034   |
| <b>2013 - 2014</b> | 1.18 (0.66, 1.70)             | <0.001  | 1.08 (1.04, 1.11)        | <0.001  | 1.05 (1.01, 1.08)        | 0.012   |
| <b>2015 - 2016</b> | 1.59 (1.03, 2.20)             | <0.001  | 1.11 (1.07, 1.16)        | <0.001  | 1.06 (1.02,1.10)         | 0.005   |
| <b>2017 - 2018</b> | 1.96 (1.34, 2.57)             | <0.001  | 1.15 (1.10, 1.21)        | <0.001  | 1.08 (1.04, 1.13)        | <0.001  |
| <b>P for trend</b> |                               | <0.001  |                          | <0.001  |                          | <0.001  |

Abbreviations: BMI, body mass index; CI, confidence interval; OR, odds ratio.

\* Models adjusted for age, sex, race, education, family poverty income ratio, total energy intake and physical activity status.

1  
2  
3  
4 Table 3 shows the annual change in mean BMI as well as obesity and overweight prevalence  
5  
6 during 2003-2004 to 2009-2010 and 2011-2012 to 2017-2018. The increase of mean BMI was  
7  
8 somewhat bigger after 2009-2010 (0.12 kg/m<sup>2</sup> annual relative increase, 95% CI 0.06-0.19) compared  
9  
10 with before 2009-2010 (0.07 kg/m<sup>2</sup> annual relative increase, 95% CI 0.02-0.13). But, this difference  
11  
12 was not statistically significant (p = 0.848). Annual changes in prevalence of obesity and overweight  
13  
14 were similar. The acceleration in the rise of obesity prevalence was mainly due to an increase in the  
15  
16 prevalence of obesity among those who are in a better economic position (0.40% annual relative  
17  
18 increase, 95% CI -1.11-1.93 vs 2.97% annual relative increase, 95% CI 1.75-4.20). Again, this  
19  
20 difference was not statistically different (p=0.985). Likewise, for the prevalence of overweight, the  
21  
22 annual increase was also numerically faster after 2009-2010 compared with before 2009-2010 (0.6%,  
23  
24 95% CI -0.08-1.27 vs 0.72%, 0.15-1.29; p = 0.584). Remarkably, the prevalence of overweight was  
25  
26 nearly unchanged among those with poor economic conditions after 2009-2010 (0.00 annual relative  
27  
28 increase, 95% CI -0.96-0.97) compared with before 2009-2010 (1.82 annual relative increase, 95% CI  
29  
30 0.55-3.10, p = 0.037). Meanwhile, both men and women with poor economic conditions slowed down  
31  
32 the increase of BMI and the prevalence of obesity and overweight after 2009-2010 compared with  
33  
34 before 2009-2010. In contrast, a bigger increase was found among those with good economic  
35  
36 conditions after 2009-2010, although without statistical significance( p > 0.05).  
37  
38  
39  
40  
41  
42  
43  
44  
45  
46  
47  
48  
49  
50  
51  
52  
53  
54  
55  
56  
57  
58  
59  
60



1  
2  
3  
4  
5  
6  
7  
8  
9  
10  
11  
12  
13  
14  
15  
16  
17  
18  
19  
20  
21  
22  
23  
24  
25  
26  
27  
28  
29  
30  
31  
32  
33  
34  
35  
36  
37  
38  
39  
40  
41  
42  
43  
44  
45  
46

**Table3. Annual change in BMI, obesity and overweight during 2003-2010 and 2011–2018**

| Characteristic                                             | Men                |                     |          | Women               |                     |          | Both                |                     |              |
|------------------------------------------------------------|--------------------|---------------------|----------|---------------------|---------------------|----------|---------------------|---------------------|--------------|
|                                                            | 2003/04-2009/2010  | 2011/12-2017/2018   | p-value* | 2003/2004-2009/2010 | 2011/2012-2017/2018 | p-value* | 2003/2004-2009/2010 | 2011/2012-2017/2018 | p-value*     |
| <b>Change (95% CI) in mean BMI (kg/m<sup>2</sup>)</b>      |                    |                     |          |                     |                     |          |                     |                     |              |
| Overall                                                    | 0.07 (0.02, 0.13)  | 0.12 (0.06, 0.19)   | 0.848    | 0.65 (-0.01, 0.14)  | 0.13 (-0.39, 2.76)  | 0.846    | 0.07 (0.02, 0.13)   | 0.12 (0.06, 0.19)   | 0.848        |
| PIR<130%                                                   | 0.17 (0.02, 0.32)  | 0.08 (-0.06, 0.22)  | 0.245    | 0.17 (0.04, 0.30)   | 0.06 (-0.09, 0.21)  | 0.186    | 0.17 (0.05, 0.28)   | 0.07 (-0.04, 0.18)  | 0.170        |
| PIR≥130%                                                   | 0.07 (-0.01, 0.14) | 0.11 (0.04, 0.17)   | 0.716    | 0.15 (-0.04, 0.13)  | 0.16 (0.07, 0.25)   | 0.943    | 0.06 (0.00, 0.11)   | 0.13 (0.07, 0.20)   | 0.922        |
| <b>Percentage change (95% CI) in obesity prevalence</b>    |                    |                     |          |                     |                     |          |                     |                     |              |
| Overall                                                    | 1.93 (0.10, 3.76)  | 2.29 (0.54, 4.02)   | 0.589    | 1.15 (-0.39, 2.76)  | 1.71 (0.56, 2.84)   | 0.699    | 1.51 (0.24, 2.81)   | 1.99 (0.93, 3.04)   | 0.689        |
| PIR<130%                                                   | 3.16 (0.12, 6.19)  | 2.38 (-0.48, 5.25)  | 0.378    | 2.38 (0.34, 4.46)   | 0.95 (-0.77, 2.67)  | 0.192    | 2.56 (0.81, 4.31)   | 1.47 (0.00, 2.95)   | 0.223        |
| PIR≥130%                                                   | 1.93 (-0.03, 3.85) | 2.08 (-0.38, 3.77)  | 0.536    | 0.97 (-1.00, 3.00)  | 2.21 (0.62, 3.78)   | 0.796    | 0.40 (-1.11, 1.93)  | 2.97 (1.75, 4.20)   | 0.985        |
| <b>Percentage change (95% CI) in overweight prevalence</b> |                    |                     |          |                     |                     |          |                     |                     |              |
| Overall                                                    | 0.69 (-0.18, 1.56) | 0.50 (-0.24, 1.24)  | 0.393    | 0.50 (-0.45, 1.47)  | 0.95 (0.30, 1.60)   | 0.746    | 0.60 (-0.08, 1.27)  | 0.72 (0.15, 1.29)   | 0.584        |
| PIR<130%                                                   | 2.64 (-0.52, 4.82) | -0.06 (-1.60, 1.50) | 0.050    | 1.33 (0.10, 2.56)   | 0.03 (-0.97, 1.04)  | 0.096    | 1.82 (0.55, 3.10)   | 0.00 (-0.96, 0.97)  | <b>0.037</b> |
| PIR≥130%                                                   | 0.36 (-0.59, 1.31) | 0.64 (-0.03, 1.33)  | 0.646    | 0.28 (-0.81, 1.40)  | 1.31 (0.55, 2.08)   | 0.900    | 0.30 (-0.50, 1.10)  | 0.95 (0.34, 1.56)   | 0.844        |

Abbreviations: BMI, body mass index; CI, confidence interval; PIR poverty income ratio.

\* p-value for difference in annual changes for 2004-2010 versus 2011-2018.

1  
2  
3  
4 Graphical representations of the changes in the distribution of mean BMI, obesity and overweight  
5  
6 prevalence are shown in the Figure1 and Figure2. Similar trends in mean BMI were found across  
7  
8 subgroups of age, PIR, education, race, sex and activity status. Overall, the mean BMI generally  
9  
10 increased overtime among all participants. In age subgroup, the lowest mean BMI was found in those  
11  
12 aged 20–30 years, followed by those aged > 70 years (Table S1, Figure1). Compared to good economic  
13  
14 conditions, BMI was higher for those with poor economic conditions since 2005-2006. In 2017-2018,  
15  
16 participants with poor economic conditions had a mean BMI 1.68 kg/m<sup>2</sup> lower than those with good  
17  
18 economic conditions. Between 2003-2004 and 2017-2018, lower mean BMI was found among  
19  
20 participants with a higher educational level than among those with a lower educational level. A similar  
21  
22 trend was found in the subgroup stratified by race. In 2017-2018, mean (SE) BMI for all participants  
23  
24 was 29.86 ± 0.26 kg/m<sup>2</sup>, with the highest mean BMI in Non-Hispanic Blacks (31.29 ± 0.29) and the  
25  
26 lowest BMI in other race population (28.21 ± 0.39) (Table1, Figure1). From 2003-2004 to 2017-2018,  
27  
28 the mean BMI rose similarly in both sexes, by about 1.61 kg/m<sup>2</sup> totally for men and 1.64 kg/m<sup>2</sup> for  
29  
30 women (Table S1, Figure2). Meanwhile, men had a lower BMI than women. In activity status  
31  
32 subgroup, there was a more complex pattern, with a decrease in mean BMI in 2011-2012 among those  
33  
34 who were inactive and insufficiently active. Although there was an acceleration in the rise of mean  
35  
36 BMI among those who were sufficiently active, their mean BMI was the lowest.  
37  
38  
39  
40  
41  
42  
43  
44  
45  
46  
47

48 The trends in increasing obesity prevalence overtime were largely consistent for men and women.  
49  
50 In 2003-2004, men had lower mean BMI and lower prevalence of obesity than women, but a reversed  
51  
52 pattern was seen in 2017-2018. In 2017-2018, men had a higher prevalence of obesity than women  
53  
54 (43.3%, 95% CI 38.2-48.4 vs 42.3%, 38.6-46.0) (Table S2, Figure2).  
55  
56  
57

58 The trends in increasing overweight prevalence overtime were similar for both sexes. Overall,  
59  
60

1  
2  
3  
4 overweight prevalence in men was higher than in women. Between 2003-2004 and 2017-2018, the  
5  
6 overweight rose similarly in both sexes, by about 1.61 kg/m<sup>2</sup> totally for men and 1.64 kg/m<sup>2</sup> for  
7  
8 women. As for overweight prevalence trends, there was increasing prevalence of men from 70.6%  
9  
10 (95%CI 68.0-73.0) in 2003-2004 to 77.4% (95%CI 73.9-80.9) in 2017-2018, and of women from  
11  
12 62.5% (95%CI 59.9-65.9) to 70.5% (95%CI 67.3-73.6) (Table S3, Figure2).  
13  
14  
15

#### 16 17 **4.Discussion**

18  
19 Based on this nationally representative sample of United States population from 2003-2014  
20  
21 though 2017-2018, the present study showed that, the prevalence of obesity among American adults  
22  
23 increased from 32.3% in 2003-2004 to 42.8% in 2017-2018. For the years 2017-2018, the prevalence  
24  
25 of obesity was 42.3% among men and 43.3% among women. Compared with 2003-2004, the mean  
26  
27 BMI increased by 1.94 kg/m<sup>2</sup>, by 15% for obesity prevalence and by 8% for overweight prevalence in  
28  
29 2017-2018 after adjusting for age, sex, race, education, PIR and activity status. The rises in mean BMI  
30  
31 and the prevalence of both obesity and overweight were somewhat bigger after 2009-2010 compared  
32  
33 with before 2009-2010. However, the difference was not statistically significant.  
34  
35  
36  
37  
38  
39

40  
41 The levels and changes in trends of mean BMI and obesity prevalence among American adults  
42  
43 have been covered by numerous studies.<sup>9 15 27-29</sup> The National Center for Health Statistics (NCHS)  
44  
45 reported that the age-adjusted obesity prevalence among adults was 42.4% in 2017-2018, and obesity  
46  
47 prevalence increased among adults From 1999-2000 through 2017-2018.<sup>15</sup> Another study using data  
48  
49 from the 2005–2014 NHANES also showed that a statistically significant positive linear trend in  
50  
51 obesity prevalence were present in women but not in men.<sup>28</sup> One recent study suggested that the  
52  
53 prevalence of obesity among US adults rose from 35.4% in 2011-2012 to 43.4% in 2017-2018. From  
54  
55 2011-2012 through 2017-2018, mean BMI rose from 28.7 kg/m<sup>2</sup> to 29.8 kg/m<sup>2</sup>.<sup>29</sup> Our results were  
56  
57  
58  
59  
60

1  
2  
3  
4 broadly consistent with the results of the above studies at each timepoints. However, our present study  
5  
6 used a larger sample size as well as a longer time span.  
7

8  
9 To the best of our knowledge, few studies have assessed annual change in BMI and obesity, and  
10  
11 the potential effects of financial crisis around 2009 among US adults. A previous study conducted  
12  
13 using NHANES data 1999–2008 showed that the increases in the prevalence of obesity do not appear  
14  
15 to be continuing at the same rate from 1999-2000 through 2007-2008. When they adjusted for age and  
16  
17 race group with survey period as a categorical variable, there were no significant differences in  
18  
19 prevalence of obesity between 2003-2004 and 2007-2008 for men.<sup>27</sup> This is broadly consistent with our  
20  
21 findings. In our study, statistically significant differences in mean BMI and obesity prevalence for both  
22  
23 sexes were found since 2009-2010 (Table 2). Furthermore, a previous study evaluated the effects of  
24  
25 economic crisis on dietary quality and obesity rates.<sup>30</sup> They found that economic changes can modify  
26  
27 diet quality increase the risk to have a poor diet or to be obese, which was mainly due to the changes in  
28  
29 economic and work conditions. In our present study, although the differences were not statistically  
30  
31 significant, numerical larger increases in mean BMI and the prevalence of both obesity and overweight  
32  
33 were found after 2009-2010 compared with before 2009-2010.  
34  
35  
36  
37  
38  
39  
40  
41  
42

43 In addition, although the mean BMI and the prevalence of obesity and overweight increased  
44  
45 overtime, the mean daily intake of energy decreased from 2003-2004 to 2017-2018 ( $2,113.90 \pm 7.96$   
46  
47 Kcal/d vs  $1,980.34 \pm 7.96$  Kcal/d,  $p < 0.001$ ). Several mechanisms may explain this phenomenon: (1)  
48  
49 The reduction in energy intake may led to hunger increases and energy expenditure declines-  
50  
51 physiological adaptations that tend to push body weight back up.<sup>31</sup> (2) In the US, carbohydrate intake  
52  
53 has increased markedly, resulting in major increases in the proportion of calories from carbohydrates.<sup>32</sup>  
54  
55  
56  
57  
58 A high-carbohydrate diet could produce postprandial hyperinsulinemia, which promotes energy storage  
59  
60

1  
2  
3  
4 and causes an increase in body weight.<sup>33</sup>  
5

6 In our study, lower mean BMI was found among participants with a higher educational level than  
7  
8 among those with a lower educational level. A previous study showed that higher educational level is  
9  
10 related to lower BMI level among mid-age women, mainly on account of selection.<sup>34</sup> It is also reported  
11  
12 that young overweight/obese women were more likely to have a lower educational level.<sup>34</sup> It might be  
13  
14 explained by the following reasons: (1) Children with a lower BMI tend come from socioeconomically  
15  
16 advantaged families, and have better chances of completing their studies.<sup>34</sup> (2) Children with a lower  
17  
18 BMI may benefit from physical activity, which may have a positive influence on academic  
19  
20 performance.<sup>35</sup> (3) Negative views on high-BMI children may impair their academic performance.<sup>36</sup>  
21  
22  
23  
24  
25  
26

27 Although NHANES is designed to provide nationally representative estimates, it is a repeated  
28  
29 cross sectional, which precludes within-individual change in BMI or obesity. Meanwhile, obesity was  
30  
31 defined mainly based on measurements of BMI, which does not measure body fat directly. Although  
32  
33 BMI is highly correlated with overall body fat<sup>37</sup>, the relationship between BMI and body fat varies by  
34  
35 sex, age, and race-ethnicity<sup>38</sup>. In addition, the use of a large nationally representative sample of adults  
36  
37 from the United States. Thus, our results are only generalizable to the US population. Therefore, there  
38  
39 are certain limitations in the extrapolation of the study results.  
40  
41  
42  
43  
44

45 The COVID-19 global pandemic has changed the lifestyle of most Americans. It has been  
46  
47 reported that approaches designed to contain the spread of COVID-19 such as lockdowns might  
48  
49 exacerbate the prevalence of obesity.<sup>39</sup> The effects of the COVID-19 global pandemic on BMI and  
50  
51 prevalence of obesity are not fully understood. Regrettably, information about anthropometric  
52  
53 measurements in NHANES after 2018 has not been released. Additional follow-up studies are required  
54  
55 to answer these questions.  
56  
57  
58  
59  
60

## 5. Conclusions

Although the prevalence of adult obesity continues to rise, there have been no significant changes in rising rate of adult obesity prevalence between 2003-2004 and 2017-2018. In 2017-2018, the prevalence of obesity was 43.3% among adult men and 42.3% among adult women.

### Author contributions:

WG, ZL: designed the research; ZL and ML: analyzed the data; ZL: wrote the paper; ZL: had full access to all the data in the study and takes responsibility for the integrity of the data and the accuracy of the data analysis; WG, ZL, ML and SW: assisted with interpretation of the results and critically reviewed the manuscript; and all authors: read and approved the final manuscript. The authors report no conflicts of interest.

### Acknowledgements

None.

### Funding sources

This research received no specific grant from any funding agency in the public, commercial or not-for-profit sectors.

### Competing interests statement

None.

### Data sharing statement

Data described in the article are publicly and freely available without restriction at <https://www.cdc.gov/nchs/nhanes/index.htm>.

### Ethics approval

Approval was obtained from the National Center for Health Statistics Research Ethics Review

1  
2  
3  
4 Board, and all participants provided written informed consent (Approval number: Protocol#98-12,  
5  
6 #2005-06, #11-17, #18-01, <https://www.cdc.gov/nchs/nhanes/irba98.htm>).  
7  
8  
9  
10  
11  
12  
13  
14  
15  
16  
17  
18  
19  
20  
21  
22  
23  
24  
25  
26  
27  
28  
29  
30  
31  
32  
33  
34  
35  
36  
37  
38  
39  
40  
41  
42  
43  
44  
45  
46  
47  
48  
49  
50  
51  
52  
53  
54  
55  
56  
57  
58  
59  
60

For peer review only

## Reference

1. Poirier P, Giles TD, Bray GA, et al. Obesity and cardiovascular disease: pathophysiology, evaluation, and effect of weight loss: an update of the 1997 American Heart Association Scientific Statement on Obesity and Heart Disease from the Obesity Committee of the Council on Nutrition, Physical Activity, and Metabolism. *Circulation* 2006;113(6):898-918. doi: 10.1161/circulationaha.106.171016 [published Online First: 2005/12/29]
2. Petrelli F, Cortellini A, Indini A, et al. Association of Obesity With Survival Outcomes in Patients With Cancer: A Systematic Review and Meta-analysis. *JAMA network open* 2021;4(3):e213520. doi: 10.1001/jamanetworkopen.2021.3520 [published Online First: 2021/03/30]
3. Islami F, Goding Sauer A, Gapstur SM, et al. Proportion of Cancer Cases Attributable to Excess Body Weight by US State, 2011-2015. *JAMA Oncol* 2019;5(3):384-92. doi: 10.1001/jamaoncol.2018.5639 [published Online First: 2018/12/28]
4. Piché ME, Tchernof A, Després JP. Obesity Phenotypes, Diabetes, and Cardiovascular Diseases. *Circ Res* 2020;126(11):1477-500. doi: 10.1161/circresaha.120.316101 [published Online First: 2020/05/22]
5. Emerging Risk Factors C, Wormser D, Kaptoge S, et al. Separate and combined associations of body-mass index and abdominal adiposity with cardiovascular disease: collaborative analysis of 58 prospective studies. *Lancet (London, England)* 2011;377(9771):1085-95. doi: 10.1016/S0140-6736(11)60105-0 [published Online First: 2011/03/15]
6. Bardou M, Barkun AN, Martel M. Obesity and colorectal cancer. *Gut* 2013;62(6):933-47. doi: 10.1136/gutjnl-2013-304701 [published Online First: 2013/03/14]
7. Collaboration NCDRF. Worldwide trends in body-mass index, underweight, overweight, and obesity from 1975 to 2016: a pooled analysis of 2416 population-based measurement studies in 128.9 million children, adolescents, and adults. *Lancet (London, England)* 2017;390(10113):2627-42. doi: 10.1016/S0140-6736(17)32129-3 [published Online First: 2017/10/17]
8. Hales CM, Fryar CD, Carroll MD, et al. Trends in Obesity and Severe Obesity Prevalence in US Youth and Adults by Sex and Age, 2007-2008 to 2015-2016. *Jama* 2018;319(16):1723-25. doi: 10.1001/jama.2018.3060 [published Online First: 2018/03/24]
9. Ward ZJ, Bleich SN, Cradock AL, et al. Projected U.S. State-Level Prevalence of Adult Obesity and Severe Obesity. *The New England journal of medicine* 2019;381(25):2440-50. doi: 10.1056/NEJMsa1909301 [published Online First: 2019/12/19]
10. Flegal KM, Carroll MD, Kuczmarski RJ, et al. Overweight and obesity in the United States: prevalence and trends, 1960-1994. *Int J Obes Relat Metab Disord* 1998;22(1):39-47. doi: 10.1038/sj.ijo.0800541 [published Online First: 1998/03/03]
11. Flegal KM, Carroll MD, Ogden CL, et al. Prevalence and trends in obesity among US adults, 1999-2000. *Jama* 2002;288(14):1723-7. doi: 10.1001/jama.288.14.1723 [published Online First: 2002/10/09]
12. Flegal KM, Carroll MD, Kit BK, et al. Prevalence of obesity and trends in the distribution of body mass index among US adults, 1999-2010. *Jama* 2012;307(5):491-7. doi: 10.1001/jama.2012.39 [published Online First: 2012/01/19]



13. Ogden CL, Carroll MD, Kit BK, et al. Prevalence of childhood and adult obesity in the United States, 2011-2012. *Jama* 2014;311(8):806-14. doi: 10.1001/jama.2014.732 [published Online First: 2014/02/27]
14. Ogden CL, Fryar CD, Martin CB, et al. Trends in Obesity Prevalence by Race and Hispanic Origin- 1999-2000 to 2017-2018. *Jama* 2020;324(12):1208-10. doi: 10.1001/jama.2020.14590 [published Online First: 2020/08/29]
15. Hales CM, Carroll MD, Fryar CD, et al. Prevalence of Obesity and Severe Obesity Among Adults: United States, 2017-2018. *NCHS Data Brief* 2020(360):1-8. [published Online First: 2020/06/04]
16. Ellison-Barnes A, Johnson S, Gudzone K. Trends in Obesity Prevalence Among Adults Aged 18 Through 25 Years, 1976-2018. *Jama* 2021;326(20):2073-74. doi: 10.1001/jama.2021.16685 [published Online First: 2021/11/24]
17. Baskin ML, Ard J, Franklin F, et al. Prevalence of obesity in the United States. *Obes Rev* 2005;6(1):5-7. doi: 10.1111/j.1467-789X.2005.00165.x [published Online First: 2005/01/19]
18. Ogden CL, Carroll MD, Kit BK, et al. Prevalence of obesity in the United States, 2009-2010. *NCHS Data Brief* 2012(82):1-8. [published Online First: 2012/05/24]
19. Kwak YE, McMillan R, McDonald EK. Trends in Overweight and Obesity Self-awareness Among Adults With Overweight or Obesity in the United States, 1999 to 2016. *Annals of internal medicine* 2021;174(5):721-23. doi: 10.7326/M20-3882 [published Online First: 2020/12/01]
20. Zipf G, Chiappa M, Porter KS, et al. National health and nutrition examination survey: plan and operations, 1999-2010. *Vital Health Stat 1* 2013(56):1-37. [published Online First: 2014/08/01]
21. Johnson CL, Paulose-Ram R, Ogden CL, et al. National health and nutrition examination survey: analytic guidelines, 1999-2010. *Vital Health Stat 2* 2013(161):1-24. [published Online First: 2014/08/05]
22. Fadeyev K, Nagao-Sato S, Reicks M. Nutrient and Food Group Intakes among U.S. Children (2-5 Years) Differ by Family Income to Poverty Ratio, NHANES 2011-2018. *International journal of environmental research and public health* 2021;18(22) doi: 10.3390/ijerph182211938 [published Online First: 2021/11/28]
23. Piercy KL, Troiano RP, Ballard RM, et al. The Physical Activity Guidelines for Americans. *Jama* 2018;320(19):2020-28. doi: 10.1001/jama.2018.14854 [published Online First: 2018/11/13]
24. Kim D, Konyn P, Cholankeril G, et al. Physical Activity Is Associated With Nonalcoholic Fatty Liver Disease and Significant Fibrosis Measured by FibroScan. *Clin Gastroenterol Hepatol* 2021 doi: 10.1016/j.cgh.2021.06.029 [published Online First: 2021/07/03]
25. Wang L, Zhou B, Zhao Z, et al. Body-mass index and obesity in urban and rural China: findings from consecutive nationally representative surveys during 2004-18. *Lancet (London, England)* 2021;398(10294):53-63. doi: 10.1016/S0140-6736(21)00798-4 [published Online First: 2021/07/05]
26. Curtin LR, Mohadjer LK, Dohrmann SM, et al. The National Health and Nutrition Examination Survey: Sample Design, 1999-2006. *Vital Health Stat 2* 2012(155):1-39. [published Online First: 2012/07/14]
27. Flegal KM, Carroll MD, Ogden CL, et al. Prevalence and trends in obesity among US adults, 1999-2008. *Jama* 2010;303(3):235-41. doi: 10.1001/jama.2009.2014 [published Online First: 2010/01/15]

- 1  
2  
3  
4  
5  
6  
7  
8  
9  
10  
11  
12  
13  
14  
15  
16  
17  
18  
19  
20  
21  
22  
23  
24  
25  
26  
27  
28  
29  
30  
31  
32  
33  
34  
35  
36  
37  
38  
39  
40  
41  
42  
43  
44  
45  
46  
47  
48  
49  
50  
51  
52  
53  
54  
55  
56  
57  
58  
59  
60
28. Flegal KM, Kruszon-Moran D, Carroll MD, et al. Trends in Obesity Among Adults in the United States, 2005 to 2014. *Jama* 2016;315(21):2284-91. doi: 10.1001/jama.2016.6458 [published Online First: 2016/06/09]
29. Liu B, Du Y, Wu Y, et al. Trends in obesity and adiposity measures by race or ethnicity among adults in the United States 2011-18: population based study. *BMJ (Clinical research ed)* 2021;372:n365. doi: 10.1136/bmj.n365 [published Online First: 2021/03/18]
30. Norte A, Sospedra I, Ortiz-Moncada R. Influence of economic crisis on dietary quality and obesity rates. *International journal of food sciences and nutrition* 2019;70(2):232-39. doi: 10.1080/09637486.2018.1492523 [published Online First: 2018/07/31]
31. Leibel RL, Rosenbaum M, Hirsch J. Changes in energy expenditure resulting from altered body weight. *The New England journal of medicine* 1995;332(10):621-8. doi: 10.1056/NEJM199503093321001 [published Online First: 1995/03/09]
32. Ford ES, Dietz WH. Trends in energy intake among adults in the United States: findings from NHANES. *The American journal of clinical nutrition* 2013;97(4):848-53. doi: 10.3945/ajcn.112.052662 [published Online First: 2013/02/22]
33. Ludwig DS, Ebbeling CB. The Carbohydrate-Insulin Model of Obesity: Beyond "Calories In, Calories Out". *JAMA Intern Med* 2018;178(8):1098-103. doi: 10.1001/jamainternmed.2018.2933 [published Online First: 2018/07/05]
34. Benson R, von Hippel PT, Lynch JL. Does more education cause lower BMI, or do lower-BMI individuals become more educated? Evidence from the National Longitudinal Survey of Youth 1979. *Soc Sci Med* 2018;211:370-77. doi: 10.1016/j.socscimed.2017.03.042 [published Online First: 2017/04/04]
35. Castelli DM, Hillman CH, Buck SM, et al. Physical fitness and academic achievement in third- and fifth-grade students. *J Sport Exerc Psychol* 2007;29(2):239-52. doi: 10.1123/jsep.29.2.239 [published Online First: 2007/06/15]
36. Crosnoe R. Gender, Obesity, and Education. *Sociology of Education* 2007;80(3):241-60. doi: 10.1177/003804070708000303
37. Flegal KM, Shepherd JA, Looker AC, et al. Comparisons of percentage body fat, body mass index, waist circumference, and waist-stature ratio in adults. *The American journal of clinical nutrition* 2009;89(2):500-8. doi: 10.3945/ajcn.2008.26847 [published Online First: 2009/01/01]
38. Gallagher D, Visser M, Sepúlveda D, et al. How useful is body mass index for comparison of body fatness across age, sex, and ethnic groups? *Am J Epidemiol* 1996;143(3):228-39. doi: 10.1093/oxfordjournals.aje.a008733 [published Online First: 1996/02/01]
39. Clemmensen C, Petersen MB, Sorensen TIA. Will the COVID-19 pandemic worsen the obesity epidemic? *Nat Rev Endocrinol* 2020;16(9):469-70. doi: 10.1038/s41574-020-0387-z [published Online First: 2020/07/10]

1  
2  
3  
4 Figure legends  
5

6 Figure1 Mean BMI by age (A), poverty income ratio (B), education (C) and race (D) group from 2003  
7  
8 to 2018.  
9

10  
11 Figure2 Mean BMI by sex (A), activity status (B)group and prevalence of overweight (C) and obesity  
12  
13 (D) from 2003 to 2018.  
14  
15  
16  
17  
18  
19  
20  
21  
22  
23  
24  
25  
26  
27  
28  
29  
30  
31  
32  
33  
34  
35  
36  
37  
38  
39  
40  
41  
42  
43  
44  
45  
46  
47  
48  
49  
50  
51  
52  
53  
54  
55  
56  
57  
58  
59  
60

For peer review only

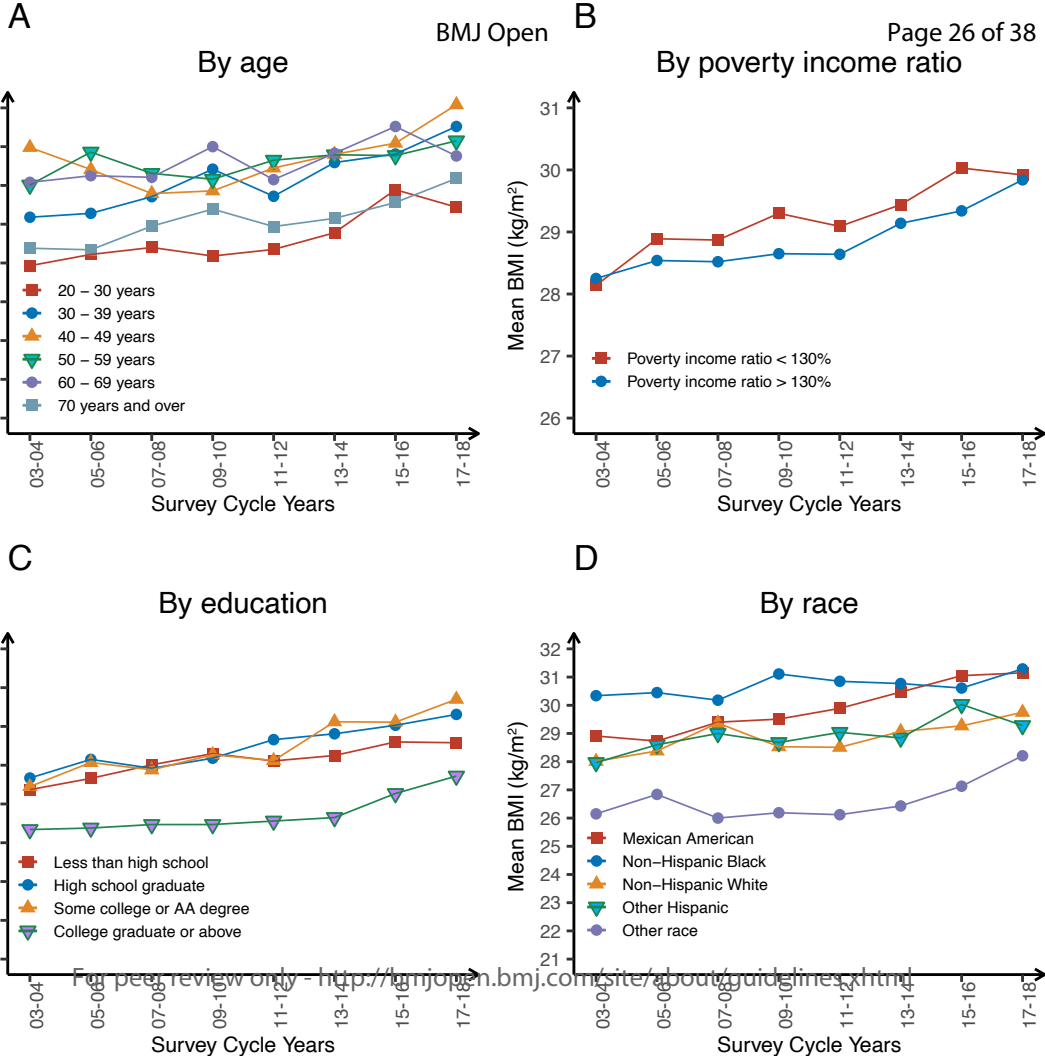

By sex

By activity status

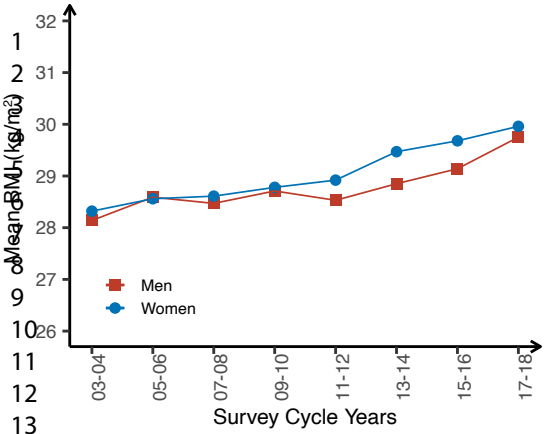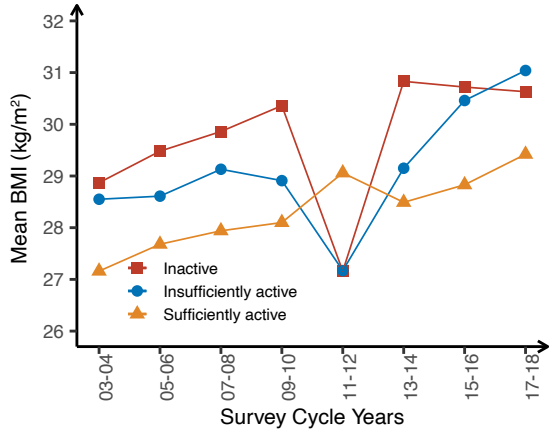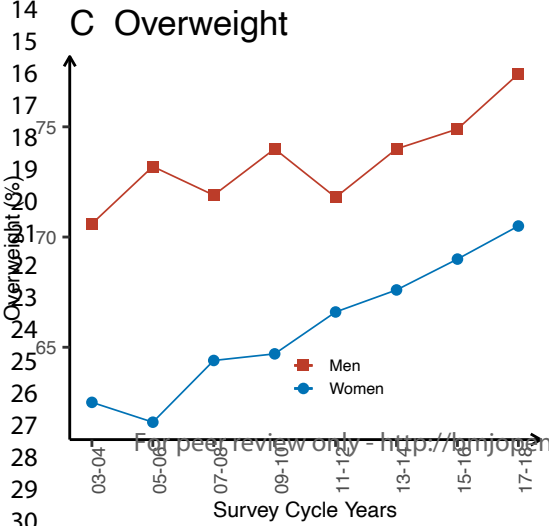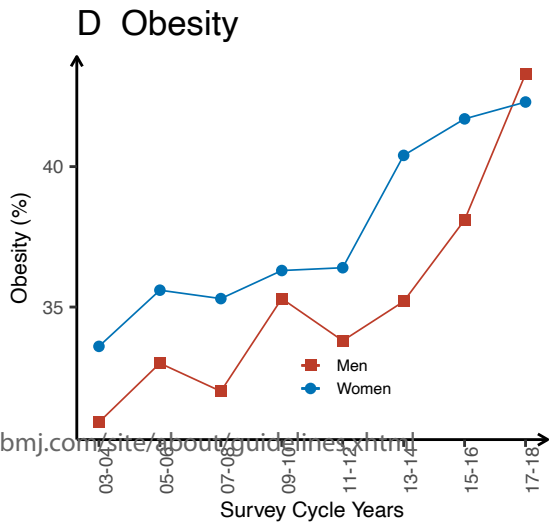

1  
2  
3  
4  
5  
6 For the annual change in mean BMI and annual relative change in prevalence of obesity and overweight, the calculation formulas were as follows:

- 7  
8
- Annual change in mean BMI (kg/m<sup>2</sup>):

9  
10

$$\text{annual change} = \frac{(\text{level}_{t_2} - \text{level}_{t_1})}{(t_2 - t_1)}$$

- 11  
12
- Annual relative change in prevalence of obesity and overweight:

13  
14  
15  
16  
17  
18  
19  
20  
21  
22  
23  
24  
25  
26  
27  
28  
29  
30  
31  
32  
33  
34  
35  
36  
37  
38  
39  
40  
41  
42  
43  
44  
45  
46

$$\text{annual change} = \left( \frac{\text{level}_{t_2}}{\text{level}_{t_1}} \right)^{\frac{1}{t_2 - t_1}} - 1$$

**eTable 1. Mean BMI overtime among adults in the United States, 2003-2018 <sup>a</sup>**

| Characteristics       | BMI (weighted mean ± SE), kg/m <sup>2</sup> |                          |                          |                          |                          |                          |                          |                          |                          |
|-----------------------|---------------------------------------------|--------------------------|--------------------------|--------------------------|--------------------------|--------------------------|--------------------------|--------------------------|--------------------------|
|                       | Total<br>(n= 42,266)                        | 2003/2004<br>(n = 4,647) | 2005/2006<br>(n = 4,680) | 2007/2008<br>(n = 5,607) | 2009/2010<br>(n = 5,994) | 2011/2012<br>(n = 5,237) | 2013/2014<br>(n = 5,520) | 2015/2016<br>(n = 5,406) | 2017/2018<br>(n = 5,175) |
| Overall               | 28.93 ± 0.07                                | 28.24 ± 0.15             | 28.57 ± 0.23             | 28.54 ± 0.16             | 28.75 ± 0.13             | 28.73 ± 0.21             | 29.17 ± 0.17             | 29.42 ± 0.25             | 29.86 ± 0.26             |
| Age, years            |                                             |                          |                          |                          |                          |                          |                          |                          |                          |
| 20 - 30               | 27.54 ± 0.14                                | 26.93 ± 0.21             | 27.22 ± 0.34             | 27.40 ± 0.45             | 27.18 ± 0.30             | 27.35 ± 0.38             | 27.78 ± 0.42             | 28.89 ± 0.39             | 28.44 ± 0.55             |
| 30 - 39               | 29.16 ± 0.13                                | 28.18 ± 0.37             | 28.28 ± 0.36             | 28.71 ± 0.28             | 29.42 ± 0.32             | 28.72 ± 0.33             | 29.59 ± 0.35             | 29.81 ± 0.31             | 30.52 ± 0.48             |
| 40 - 49               | 29.53 ± 0.13                                | 28.98 ± 0.28             | 29.41 ± 0.32             | 28.79 ± 0.27             | 28.86 ± 0.22             | 29.45 ± 0.35             | 29.80 ± 0.42             | 30.09 ± 0.52             | 31.08 ± 0.36             |
| 50 - 59               | 29.61 ± 0.14                                | 29.01 ± 0.41             | 29.86 ± 0.43             | 29.31 ± 0.42             | 29.16 ± 0.24             | 29.65 ± 0.51             | 29.79 ± 0.31             | 29.77 ± 0.40             | 30.15 ± 0.32             |
| 60 - 69               | 29.66 ± 0.13                                | 29.08 ± 0.23             | 29.25 ± 0.29             | 29.21 ± 0.33             | 30.00 ± 0.29             | 29.15 ± 0.40             | 29.83 ± 0.32             | 30.52 ± 0.40             | 29.76 ± 0.46             |
| ≥ 70                  | 28.16 ± 0.10                                | 27.38 ± 0.23             | 27.34 ± 0.25             | 27.95 ± 0.25             | 28.39 ± 0.22             | 27.94 ± 0.31             | 28.15 ± 0.24             | 28.56 ± 0.35             | 29.18 ± 0.26             |
| Sex                   |                                             |                          |                          |                          |                          |                          |                          |                          |                          |
| Male                  | 28.79 ± 0.08                                | 28.14 ± 0.13             | 28.59 ± 0.25             | 28.47 ± 0.16             | 28.71 ± 0.21             | 28.53 ± 0.23             | 28.85 ± 0.15             | 29.14 ± 0.26             | 29.75 ± 0.27             |
| Female                | 29.07 ± 0.09                                | 28.32 ± 0.24             | 28.56 ± 0.28             | 28.61 ± 0.20             | 28.78 ± 0.14             | 28.92 ± 0.23             | 29.47 ± 0.26             | 29.68 ± 0.29             | 29.96 ± 0.37             |
| Race                  |                                             |                          |                          |                          |                          |                          |                          |                          |                          |
| Mexican American      | 29.96 ± 0.13                                | 28.91 ± 0.39             | 28.73 ± 0.22             | 29.40 ± 0.31             | 29.51 ± 0.27             | 29.89 ± 0.38             | 30.47 ± 0.24             | 31.05 ± 0.33             | 31.15 ± 0.35             |
| Other Hispanic        | 29.05 ± 0.15                                | 27.97 ± 0.64             | 28.60 ± 0.51             | 29.00 ± 0.41             | 28.68 ± 0.41             | 29.04 ± 0.31             | 28.84 ± 0.50             | 30.03 ± 0.40             | 29.28 ± 0.33             |
| Non-Hispanic White    | 28.73 ± 0.09                                | 28.01 ± 0.18             | 28.38 ± 0.25             | 28.37 ± 0.26             | 28.53 ± 0.16             | 28.51 ± 0.28             | 29.07 ± 0.19             | 29.27 ± 0.26             | 29.75 ± 0.35             |
| Non-Hispanic Black    | 30.72 ± 0.11                                | 30.34 ± 0.31             | 30.45 ± 0.28             | 30.18 ± 0.30             | 31.11 ± 0.35             | 30.85 ± 0.28             | 30.77 ± 0.31             | 30.61 ± 0.34             | 31.29 ± 0.29             |
| Other race            | 26.77 ± 0.16                                | 26.15 ± 0.52             | 26.84 ± 0.65             | 26.00 ± 0.55             | 26.19 ± 0.39             | 26.12 ± 0.41             | 26.43 ± 0.36             | 27.13 ± 0.42             | 28.21 ± 0.39             |
| Education             |                                             |                          |                          |                          |                          |                          |                          |                          |                          |
| Less than high school | 29.09 ± 0.09                                | 28.37 ± 0.32             | 28.66 ± 0.16             | 29.01 ± 0.25             | 29.30 ± 0.22             | 29.11 ± 0.28             | 29.25 ± 0.21             | 29.60 ± 0.29             | 29.58 ± 0.37             |
| High school graduate  | 29.47 ± 0.10                                | 28.67 ± 0.20             | 29.15 ± 0.27             | 28.92 ± 0.29             | 29.18 ± 0.20             | 29.66 ± 0.37             | 29.81 ± 0.33             | 30.03 ± 0.38             | 30.31 ± 0.18             |

|    |                           |              |              |              |              |              |              |              |              |              |  |  |  |
|----|---------------------------|--------------|--------------|--------------|--------------|--------------|--------------|--------------|--------------|--------------|--|--|--|
| 1  |                           |              |              |              |              |              |              |              |              |              |  |  |  |
| 2  |                           |              |              |              |              |              |              |              |              |              |  |  |  |
| 3  |                           |              |              |              |              |              |              |              |              |              |  |  |  |
| 4  |                           |              |              |              |              |              |              |              |              |              |  |  |  |
| 5  | Some college or AA degree | 29.51 ± 0.10 | 28.45 ± 0.22 | 29.07 ± 0.29 | 28.88 ± 0.25 | 29.27 ± 0.17 | 29.12 ± 0.28 | 30.12 ± 0.27 | 30.11 ± 0.33 | 30.70 ± 0.32 |  |  |  |
| 6  |                           |              |              |              |              |              |              |              |              |              |  |  |  |
| 7  | College graduate or above | 27.78 ± 0.11 | 27.34 ± 0.33 | 27.38 ± 0.37 | 27.40 ± 0.28 | 27.47 ± 0.30 | 27.56 ± 0.34 | 27.65 ± 0.20 | 28.27 ± 0.26 | 28.72 ± 0.43 |  |  |  |
| 8  |                           |              |              |              |              |              |              |              |              |              |  |  |  |
| 9  |                           |              |              |              |              |              |              |              |              |              |  |  |  |
| 10 | Poverty income ratio      |              |              |              |              |              |              |              |              |              |  |  |  |
| 11 | < 130%                    | 28.14 ± 0.22 | 28.14 ± 0.22 | 28.89 ± 0.31 | 28.87 ± 0.28 | 29.30 ± 0.34 | 29.09 ± 0.21 | 29.44 ± 0.21 | 30.03 ± 0.32 | 29.92 ± 0.39 |  |  |  |
| 12 |                           |              |              |              |              |              |              |              |              |              |  |  |  |
| 13 | ≥ 130%                    | 28.25 ± 0.15 | 28.25 ± 0.15 | 28.54 ± 0.24 | 28.52 ± 0.16 | 28.65 ± 0.15 | 28.64 ± 0.26 | 29.14 ± 0.23 | 29.34 ± 0.27 | 28.24 ± 0.15 |  |  |  |
| 14 | Physical activity         |              |              |              |              |              |              |              |              |              |  |  |  |
| 15 | Inactive                  | 28.53 ± 0.09 | 28.87 ± 0.72 | 29.48 ± 0.82 | 29.86 ± 0.21 | 30.36 ± 0.21 | 27.16 ± 0.35 | 30.83 ± 0.30 | 30.72 ± 0.33 | 30.63 ± 0.39 |  |  |  |
| 16 |                           |              |              |              |              |              |              |              |              |              |  |  |  |
| 17 | Insufficiently active     | 28.98 ± 0.12 | 28.55 ± 0.20 | 28.61 ± 0.28 | 29.13 ± 0.34 | 28.91 ± 0.21 | 27.17 ± 0.38 | 29.15 ± 0.32 | 30.46 ± 0.58 | 31.04 ± 0.42 |  |  |  |
| 18 |                           |              |              |              |              |              |              |              |              |              |  |  |  |
| 19 | Sufficiently active       | 28.53 ± 0.09 | 27.16 ± 0.23 | 27.68 ± 0.27 | 27.94 ± 0.20 | 28.10 ± 0.18 | 29.06 ± 0.22 | 28.49 ± 0.17 | 28.83 ± 0.25 | 29.42 ± 0.29 |  |  |  |

<sup>a</sup> Data are presented incorporating sample weights and adjusted for clusters and strata of the complex sample design of the National Health and Nutrition Examination Survey (2003–2018).

Abbreviations: AA, Associate of Arts; BMI, body mass index; CI, confidence interval.



1  
2  
3  
4  
5  
6  
7  
8  
9  
10  
11  
12  
13  
14  
15  
16  
17  
18  
19  
20  
21  
22  
23  
24  
25  
26  
27  
28  
29  
30  
31  
32  
33  
34  
35  
36  
37  
38  
39  
40  
41  
42  
43  
44  
45  
46

**eTable 2. Prevalence of obesity overtime among adults in the United States, 2003-2018 <sup>a</sup>**

| Characteristics       | Prevalence (95CI),%  |                          |                          |                          |                          |                          |                          |                          |                          |
|-----------------------|----------------------|--------------------------|--------------------------|--------------------------|--------------------------|--------------------------|--------------------------|--------------------------|--------------------------|
|                       | Total<br>(n= 42,266) | 2003/2004<br>(n = 4,647) | 2005/2006<br>(n = 4,680) | 2007/2008<br>(n = 5,607) | 2009/2010<br>(n = 5,994) | 2011/2012<br>(n = 5,237) | 2013/2014<br>(n = 5,520) | 2015/2016<br>(n = 5,406) | 2017/2018<br>(n = 5,175) |
| Overall               | 36.7 (35.7, 37.6)    | 32.3 (29.9, 34.6)        | 34.4 (31.6, 37.2)        | 33.7 (31.5, 35.9)        | 35.8 (34.0, 37.7)        | 35.2 (32.4, 37.9)        | 37.9 (36.2, 39.6)        | 40.0 (37.0, 43.0)        | 42.8 (39.5, 46.1)        |
| Age, years            |                      |                          |                          |                          |                          |                          |                          |                          |                          |
| < 30                  | 29.6 (27.9, 31.4)    | 26.1 (23.1, 29.0)        | 27.7 (22.7, 32.6)        | 27.4 (21.6, 33.2)        | 27.7 (24.0, 31.4)        | 29.0 (23.9, 34.1)        | 29.5 (25.8, 33.1)        | 31.7 (26.7, 36.7)        | 37.5 (30.2, 44.8)        |
| 30 - 39               | 37.1 (35.5, 38.7)    | 32.5 (27.6, 37.5)        | 31.1 (26.6, 35.6)        | 35.5 (30.5, 39.7)        | 39.7 (35.4, 44.1)        | 33.5 (30.2, 36.9)        | 39.9 (35.9, 43.9)        | 40.5 (37.0, 44.1)        | 44.3 (38.8, 49.9)        |
| 40 - 49               | 39.3 (37.7, 40.9)    | 36.7 (34.2, 39.2)        | 39.0 (34.4, 43.6)        | 33.7 (29.4, 38.1)        | 36.2 (33.0, 39.5)        | 38.8 (33.4, 44.2)        | 41.1 (35.7, 46.5)        | 44.0 (38.1, 49.8)        | 46.3 (41.7, 51.0)        |
| 50 - 59               | 40.5 (38.6, 42.4)    | 35.9 (29.6, 42.1)        | 43.2 (38.6, 47.7)        | 38.1 (32.5, 43.6)        | 37.2 (33.8, 40.5)        | 39.5 (33.2, 45.9)        | 41.7 (37.1, 46.3)        | 42.7 (35.8, 49.6)        | 44.9 (40.7, 49.1)        |
| 60 - 69               | 41.6 (39.6, 43.6)    | 35.7 (32.1, 39.3)        | 38.7 (34.1, 43.3)        | 38.6 (34.4, 42.8)        | 43.8 (39.7, 48.0)        | 39.5 (34.5, 44.6)        | 42.9 (38.9, 46.9)        | 46.0 (40.3, 51.6)        | 43.3 (35.3, 51.4)        |
| ≥ 70                  | 32.2 (30.7, 33.6)    | 26.2 (22.4, 30.0)        | 25.8 (21.4, 30.2)        | 30.9 (27.0, 34.8)        | 33.4 (30.0, 36.8)        | 29.5 (26.4, 32.7)        | 32.7 (28.4, 37.0)        | 35.5 (30.9, 40.1)        | 40.3 (36.0, 44.6)        |
| Sex                   |                      |                          |                          |                          |                          |                          |                          |                          |                          |
| Men                   | 35.3 (34.1, 36.6)    | 30.9 (28.4, 33.4)        | 33.0 (28.9, 37.1)        | 32.0 (29.1, 34.8)        | 35.3 (31.9, 38.7)        | 33.8 (31.2, 36.4)        | 35.2 (33.2, 37.2)        | 38.1 (33.9, 42.3)        | 43.3 (38.2, 48.4)        |
| Women                 | 37.9 (36.8, 38.9)    | 33.6 (30.3, 36.8)        | 35.6 (33.0, 38.3)        | 35.3 (33.0, 37.6)        | 36.3 (34.5, 38.1)        | 36.4 (33.0, 39.8)        | 40.4, 37.9, 43.0)        | 41.7 (38.7, 44.7)        | 42.3 (38.6, 46.0)        |
| Race                  |                      |                          |                          |                          |                          |                          |                          |                          |                          |
| Mexican American      | 43.1 (41.5, 44.8)    | 36.3 (31.2, 41.4)        | 33.3 (31.6, 35.1)        | 39.2 (32.2, 46.2)        | 38.9 (36.4, 43.4)        | 45.2 (40.7, 49.7)        | 46.7 (42.5, 51.0)        | 49.0 (45.6, 52.4)        | 51.6 (47.5, 55.8)        |
| Other Hispanic        | 37.0 (35.0, 39.1)    | 29.5 (19.2, 39.8)        | 34.2 (26.6, 41.9)        | 34.9 (30.3, 39.6)        | 34.7 (28.8, 40.6)        | 38.1 (32.7, 43.6)        | 36.9 (31.2, 42.6)        | 44.2 (38.4, 49.9)        | 37.0 (42.7, 41.2)        |
| Non-Hispanic White    | 35.5 (34.4, 36.6)    | 31.0 (28.5, 33.4)        | 33.3 (30.2, 36.5)        | 32.6 (29.2, 36.0)        | 34.7 (32.4, 37.1)        | 33.4 (29.9, 37.0)        | 37.0 (35.0, 39.1)        | 38.9 (35.7, 42.1)        | 43.0 (38.2, 47.7)        |
| Non-Hispanic Black    | 47.1 (45.7, 48.5)    | 45.2 (40.9, 49.4)        | 45.4 (42.0, 48.8)        | 43.6 (39.6, 47.5)        | 49.9 (45.1, 54.7)        | 47.8 (44.3, 51.2)        | 47.9 (43.8, 52.1)        | 46.8 (42.5, 51.1)        | 49.8 (46.9, 52.7)        |
| Other race            | 23.7 (21.4, 25.9)    | 19.0 (9.9, 28.0)         | 26.4 (17.6, 35.2)        | 19.4 (9.9, 29.0)         | 19.7 (15.4, 24.0)        | 18.8 (13.9, 23.8)        | 21.4 (16.7, 26.0)        | 28.0 (21.3, 36.7)        | 30.6 (25.5, 35.7)        |
| Education             |                      |                          |                          |                          |                          |                          |                          |                          |                          |
| Less than high school | 37.9 (36.7, 39.2)    | 34.3 (30.0, 38.5)        | 35.7 (33.3, 38.1)        | 37.6 (33.1, 42.0)        | 37.6 (34.9, 40.3)        | 37.7 (35.1, 40.4)        | 40.6 (37.5, 43.6)        | 40.3 (36.3, 43.7)        | 41.4 (37.3, 45.6)        |
| High school graduate  | 40.0 (38.5, 41.4)    | 34.3 (30.5, 38.1)        | 38.9 (35.1, 42.6)        | 35.0 (31.6, 38.4)        | 38.3 (34.6, 42.0)        | 40.3 (35.3, 45.5)        | 41.3 (37.0, 45.7)        | 43.7 (38.6, 48.9)        | 47.2 (43.2, 51.2)        |
| Some college or AA    | 40.7 (39.4, 41.9)    | 33.9 (30.4, 37.4)        | 36.8 (32.9, 40.7)        | 37.5 (34.4, 40.6)        | 40.6 (38.3, 42.9)        | 38.0 (34.0, 41.9)        | 42.9 (40.1, 45.7)        | 46.0 (42.2, 49.8)        | 47.7 (43.8, 51.5)        |

1  
2  
3  
4  
5  
6  
7  
8  
9  
10  
11  
12  
13  
14  
15  
16  
17  
18  
19  
20  
21  
22  
23  
24  
25  
26  
27  
28  
29  
30  
31  
32  
33  
34  
35  
36  
37  
38  
39  
40  
41  
42  
43  
44  
45  
46

---

|                          |                   |                   |                   |                   |                   |                   |                   |                   |                   |  |
|--------------------------|-------------------|-------------------|-------------------|-------------------|-------------------|-------------------|-------------------|-------------------|-------------------|--|
| 5 degree                 |                   |                   |                   |                   |                   |                   |                   |                   |                   |  |
| 6 College graduate or    | 28.8 (27.2, 30.4) | 26.3 (22.0, 30.7) | 26.2 (21.9, 30.5) | 24.9 (20.9, 28.9) | 27.5 (23.7, 31.4) | 27.6 (22.5, 32.8) | 28.7 (26.2, 31.3) | 31.5 (27.5, 35.4) | 34.7 (29.1, 40.2) |  |
| 7 above                  |                   |                   |                   |                   |                   |                   |                   |                   |                   |  |
| 8 above                  |                   |                   |                   |                   |                   |                   |                   |                   |                   |  |
| 9 Poverty income ratio   |                   |                   |                   |                   |                   |                   |                   |                   |                   |  |
| 10 < 130%                | 38.4 (37.2, 39.6) | 32.3 (29.7, 34.6) | 36.3 (33.1, 39.6) | 35.9 (32.1, 39.7) | 38.4 (34.8, 41.9) | 38.0 (35.5, 40.6) | 39.4 (36.9, 41.8) | 42.0 (38.1, 45.9) | 43.8 (39.7, 47.9) |  |
| 11 > 130%                | 36.4 (35.3, 37.4) | 32.3 (29.6, 34.9) | 34.3 (31.0, 37.6) | 33.1 (30.9, 35.4) | 35.7 (33.4, 37.9) | 34.3 (31.0, 37.6) | 37.6 (35.3, 40.0) | 39.8 (36.3, 43.2) | 43.1 (39.6, 46.7) |  |
| 12                       |                   |                   |                   |                   |                   |                   |                   |                   |                   |  |
| 13 Physical activity     |                   |                   |                   |                   |                   |                   |                   |                   |                   |  |
| 14 Inactive              | 44.8 (43.4, 46.2) | 38.0 (30.4, 45.6) | 41.7 (29.5, 53.9) | 42.6 (39.7, 45.4) | 44.4 (42.4, 46.4) | 26.2 (20.0, 32.3) | 48.5 (44.9, 52.1) | 48.0 (44.5, 51.5) | 46.7 (43.1, 50.4) |  |
| 15 Insufficiently active | 36.4 (34.8, 38.0) | 33.7 (30.6, 36.7) | 34.0 (30.8, 37.3) | 36.3 (31.1, 41.4) | 37.3 (33.0, 41.6) | 27.4 (22.0, 32.8) | 36.9 (33.6, 40.1) | 44.5 (37.2, 51.8) | 48.3 (41.7, 54.9) |  |
| 16 Sufficiently active   | 34.3 (33.2, 35.4) | 24.8 (21.5, 28.2) | 29.1 (24.9, 33.4) | 30.0 (27.5, 32.5) | 32.3 (29.7, 34.9) | 36.9 (34.2, 39.5) | 33.7 (31.9, 35.5) | 36.6 (33.4, 39.7) | 40.6 (36.7, 44.6) |  |
| 17                       |                   |                   |                   |                   |                   |                   |                   |                   |                   |  |

---

<sup>a</sup> Data are presented incorporating sample weights and adjusted for clusters and strata of the complex sample design of the National Health and Nutrition

Examination Survey (2003–2018).

Abbreviations: AA, Associate of Arts; BMI, body mass index; CI, confidence interval.

1  
2  
3  
4  
5  
6  
7  
8  
9  
10  
11  
12  
13  
14  
15  
16  
17  
18  
19  
20  
21  
22  
23  
24  
25  
26  
27  
28  
29  
30  
31  
32  
33  
34  
35  
36  
37  
38  
39  
40  
41  
42  
43  
44  
45  
46

**eTable 3. Prevalence of overweight overtime among adults in the United States, 2003-2018 <sup>a</sup>**

| Characteristics       | Prevalence (95CI),%  |                          |                          |                          |                          |                          |                          |                          |                          |
|-----------------------|----------------------|--------------------------|--------------------------|--------------------------|--------------------------|--------------------------|--------------------------|--------------------------|--------------------------|
|                       | Total<br>(n= 42,266) | 2003/2004<br>(n = 4,647) | 2005/2006<br>(n = 4,680) | 2007/2008<br>(n = 5,607) | 2009/2010<br>(n = 5,994) | 2011/2012<br>(n = 5,237) | 2013/2014<br>(n = 5,520) | 2015/2016<br>(n = 5,406) | 2017/2018<br>(n = 5,175) |
| Overall               | 69.6 (68.7, 70.5)    | 66.3 (64.4, 68.3)        | 67.2 (64.6, 69.8)        | 68.0 (66.2, 69.8)        | 69.2 (66.6, 71.7)        | 69.1 (65.9, 72.3)        | 70.7 (69.0, 72.3)        | 71.8 (68.9, 74.8)        | 73.8 (71.1, 76.4)        |
| Age, years            |                      |                          |                          |                          |                          |                          |                          |                          |                          |
| 20 - 30               | 56.6 (54.7, 58.5)    | 53.4 (49.1, 57.6)        | 56.4 (51.9, 60.8)        | 55.2 (51.1, 59.3)        | 56.7 (50.7, 62.7)        | 54.9 (47.4, 62.3)        | 56.6 (52.4, 60.9)        | 59.7 (55.3, 64.1)        | 59.4 (53.2, 65.5)        |
| 30 - 39               | 69.8 (68.1, 71.4)    | 63.0 (57.7, 68.4)        | 64.6 (59.1, 70.0)        | 69.3 (65.9, 72.8)        | 70.7 ( 67.0, 74.5)       | 68.6 (64.4, 72.7)        | 72.3 (68.2, 76.3)        | 73.2 (69.5, 76.8)        | 76.2 (70.6, 81.8)        |
| 40 - 49               | 74.0 (72.4, 75.5)    | 73.9 (69.2, 78.6)        | 70.2 (66.2, 74.2)        | 71.4 (67.6, 75.3)        | 69.6 (66.4, 72.9)        | 75.9 (71.7, 80.1)        | 76.6 (73.0, 80.2)        | 73.9 (68.7, 79.0)        | 80.9 (75.5, 86.3)        |
| 50 - 59               | 74.0 (72.4, 75.6)    | 71.1 (66.7, 75.5)        | 75.5 (71.0, 79.9)        | 71.9 (66.7, 77.1)        | 74.3 (70.0, 78.5)        | 75.2 (70.6, 79.8)        | 74.6 (72.2, 77.0)        | 74.1 (69.6, 78.7)        | 74.8 (69.3, 80.4)        |
| 60 - 69               | 77.1 (75.4, 78.8)    | 76.7 (73.4, 80.1)        | 76.7 (71.7, 81.6)        | 75.5 (71.4, 79.6)        | 78.6 (74.7, 82.5)        | 74.4 (68.3, 80.6)        | 76.0 (72.5, 79.5)        | 80.1 (74.5, 85.7)        | 78.1 (73.6, 82.5)        |
| ≥ 70                  | 70.2 (68.9, 71.4)    | 65.6 (61.0, 70.2)        | 63.9 (60.4, 67.4)        | 69.1 (65.8, 72.4)        | 71.0 (68.2, 73.8)        | 67.4 (63.8, 70.9)        | 70.8 (68.2, 73.4)        | 73.8 (70.2, 77.4)        | 77.1 (73.5, 80.7)        |
| Sex                   |                      |                          |                          |                          |                          |                          |                          |                          |                          |
| Male                  | 73.5 (72.5, 75.6)    | 70.6 (68.0, 73.0)        | 73.2 (70.3, 76.2)        | 71.9 (70.1, 73.7)        | 74.0 (70.4, 77.6)        | 71.8 (68.6, 75.0)        | 74.0 (71.9, 76.1)        | 74.9 (72.0, 77.8)        | 77.4 (73.9, 80.9)        |
| Female                | 66.0 (64.9, 67.1)    | 62.5 (59.9, 65.9)        | 61.6 (58.3, 64.8)        | 64.4 (61.7, 67.1)        | 64.7 (62.3, 67.1)        | 66.6 (63.0, 70.2)        | 67.6 (65.2, 70.0)        | 69.0 (65.4, 72.6)        | 70.5 (67.3, 73.6)        |
| Race                  |                      |                          |                          |                          |                          |                          |                          |                          |                          |
| Mexican American      | 79.7 (78.1, 81.2)    | 73.8 (67.8, 79.8)        | 73.4 (69.8, 77.0)        | 77.3 (73.3, 81.2)        | 79.9 (76.5, 83.3)        | 78.6 (72.7, 84.5)        | 83.2 (80.1, 86.3)        | 82.8 (78.9, 86.8)        | 85.3 (80.8, 89.9)        |
| Other Hispanic        | 74.6 (72.9, 76.3)    | 68.4 (58.1, 78.7)        | 70.5 (62.3, 78.8)        | 74.8 (69.5, 80.1)        | 72.2 (69.4, 75.1)        | 75.2 (71.8, 78.7)        | 70.0 (64.7, 75.2)        | 78.5 (74.8, 82.2)        | 80.0 (76.0, 84.1)        |
| Non-Hispanic White    | 68.7 (67.7, 69.8)    | 65.2 (62.3, 68.0)        | 66.1 (62.8, 69.4)        | 67.2 (64.6, 69.9)        | 68.1 (65.0, 71.2)        | 68.7 (64.9, 72.5)        | 70.6 (69.0, 72.2)        | 71.5 (68.6, 74.3)        | 72.2 (68.6, 75.8)        |
| Non-Hispanic Black    | 75.5 (74.4, 76.6)    | 75.8 (72.8, 78.7)        | 75.5 (72.0, 79.1)        | 73.0 (70.6, 75.4)        | 76.4 (73.3, 79.5)        | 76.2 (73.0, 79.4)        | 75.5 (72.2, 78.7)        | 75.0 (71.8, 78.1)        | 76.4 (73.6, 79.1)        |
| Other race            | 54.1 (51.9, 56.3)    | 50.4 (42.2,58.6)         | 51.0 (40.9, 61.0)        | 49.2 (41.9, 56.5)        | 53.0 (45.8, 60.1)        | 47.3 (43.5, 51.1)        | 50.1 (44.3, 56.0)        | 55.8 (50.6, 61.0)        | 66.5 (63.1, 70.0)        |
| Education             |                      |                          |                          |                          |                          |                          |                          |                          |                          |
| Less than high school | 71.8 (70.4, 73.2)    | 66.9 (61.8, 72.0)        | 67.8 (64.6, 71.0)        | 71.3 (68.5, 74.1)        | 75.0 (70.9, 79.1)        | 71.7 (67.7, 75.7)        | 73.7 (70.9, 76.4)        | 73.8 (69.1, 78.6)        | 74.7 (71.4, 78.0)        |
| High school graduate  | 72.4 (71.2, 73.6)    | 69.5 (67.4, 71.6)        | 70.0 (66.3, 73.7)        | 69.9 (66.8, 72.9)        | 71.3 (68.3, 74.4)        | 73.1 (68.1, 78.1)        | 73.6 (70.5, 76.8)        | 77.3 (73.4, 81.2)        | 74.7 (71.6, 77.8)        |
| Some college or AA    | 71.9 (70.7, 73.1)    | 68.1 (64.8, 71.3)        | 70.1 (66.8, 73.4)        | 69.0 (66.2, 71.8)        | 70.2 (66.6, 73.8)        | 70.5 (65.8, 75.2)        | 74.4 (72.4, 76.5)        | 74.7 (71.8, 77.6)        | 76.9 (73.6, 80.1)        |

1  
2  
3  
4  
5  
6  
7  
8  
9  
10  
11  
12  
13  
14  
15  
16  
17  
18  
19  
20  
21  
22  
23  
24  
25  
26  
27  
28  
29  
30  
31  
32  
33  
34  
35  
36  
37  
38  
39  
40  
41  
42  
43  
44  
45  
46

|                          |                   |                   |                   |                   |                   |                   |                   |                   |                   |  |  |  |
|--------------------------|-------------------|-------------------|-------------------|-------------------|-------------------|-------------------|-------------------|-------------------|-------------------|--|--|--|
| 5 degree                 |                   |                   |                   |                   |                   |                   |                   |                   |                   |  |  |  |
| 6 College graduate or    | 63.6 (62.0, 65.2) | 60.0 (55.0, 65.0) | 60.4 (55.2, 65.7) | 62.3 (58.1, 66.5) | 62.6 (57.3, 68.0) | 63.8 (58.6, 69.0) | 63.0 (59.7, 66.2) | 64.5 (60.2, 68.9) | 69.5 (65.0, 74.0) |  |  |  |
| 7 above                  |                   |                   |                   |                   |                   |                   |                   |                   |                   |  |  |  |
| 8 above                  |                   |                   |                   |                   |                   |                   |                   |                   |                   |  |  |  |
| 9 Poverty income ratio   |                   |                   |                   |                   |                   |                   |                   |                   |                   |  |  |  |
| 10 < 130%                | 68.8 (67.4, 70.3) | 62.6 (59.1, 66.1) | 67.3 (63.1, 71.6) | 67.1 (63.9, 70.4) | 71.1 (66.3, 75.8) | 68.4 (64.2, 72.7) | 69.1 (65.9, 72.4) | 72.6 (68.1, 77.2) | 71.0 (67.1, 74.9) |  |  |  |
| 11 > 130%                | 69.9 (68.9, 70.9) | 67.3 (64.8, 69.8) | 67.2 (64.1, 70.4) | 68.3 (66.5, 70.2) | 68.8 (65.9, 71.6) | 69.3 (65.6, 73.0) | 71.3 (69.1, 73.6) | 71.6 (68.2, 75.0) | 74.9 (72.3, 77.4) |  |  |  |
| 12                       |                   |                   |                   |                   |                   |                   |                   |                   |                   |  |  |  |
| 13 Physical activity     |                   |                   |                   |                   |                   |                   |                   |                   |                   |  |  |  |
| 14 Inactive              | 75.6 (74.3, 76.9) | 67.8 (59.4, 76.0) | 74.2 (66.0, 82.6) | 71.7 (69.5, 74.0) | 76.3 (73.4, 79.2) | 63.2 (56.5, 69.9) | 78.4 (75.4, 81.5) | 77.6 (73.8, 81.4) | 78.3 (75.4, 81.2) |  |  |  |
| 15 Insufficiently active | 69.7 (68.1, 71.3) | 68.3 (66.1, 70.5) | 68.2 (63.6, 72.7) | 69.4 (65.9, 73.0) | 68.1 (64.1, 72.1) | 59.6 (53.1, 66.1) | 71.0 (66.0, 76.0) | 76.0 (70.1, 81.8) | 81.1 (77.8, 84.4) |  |  |  |
| 16 Sufficiently active   | 67.9 (66.7, 69.1) | 60.9 (56.1, 65.7) | 62.0 (58.2, 65.7) | 66.4 (63.9, 68.8) | 66.7 (62.9, 70.4) | 70.8 (67.6, 74.0) | 67.4 (65.4, 69.4) | 69.3 (66.3, 72.2) | 71.1 (67.8, 74.5) |  |  |  |
| 17                       |                   |                   |                   |                   |                   |                   |                   |                   |                   |  |  |  |

<sup>a</sup> Data are presented incorporating sample weights and adjusted for clusters and strata of the complex sample design of the National Health and Nutrition

Examination Survey (2003–2018).

Abbreviations: AA, Associate of Arts; BMI, body mass index; CI, confidence interval.

**eTable 4. Change in mean BMI by sex among adults in the United States, 2003-2018**

| Years       | Weighted mean BMI             |         |                               |         |                               |         |
|-------------|-------------------------------|---------|-------------------------------|---------|-------------------------------|---------|
|             | Men                           |         | Women                         |         | Both                          |         |
|             | Adjusted $\beta^a$<br>(95%CI) | p-value | Adjusted $\beta^a$<br>(95%CI) | p-value | Adjusted $\beta^a$<br>(95%CI) | p-value |
| 2003 - 2004 | Reference                     |         | Reference                     |         | Reference                     |         |
| 2005 - 2006 | 0.38 (-0.29,1.06)             | 0.259   | 0.44 (-0.47, 1.35)            | 0.338   | 0.38 (-0.23,0.99)             | 0.215   |
| 2007 - 2008 | 0.42 (-0.14,0.97)             | 0.139   | 0.52 (-0.10, 1.15)            | 0.102   | 0.48 (0.04,0.93)              | 0.035   |
| 2009 - 2010 | 0.72 (0.09,1.35)              | 0.025   | 0.64 (0.04, 1.23)             | 0.037   | 0.70 (0.26,1.15)              | 0.002   |
| 2011 - 2012 | 0.64 (0.04, 1.23)             | 0.035   | 1.50 (0.84, 2.16)             | <0.001  | 1.08 (0.55, 1.61)             | <0.001  |
| 2013 - 2014 | 0.73 (0.18, 1.28)             | 0.010   | 1.55 (0.78, 2.32)             | <0.001  | 1.18 (0.66, 1.70)             | <0.001  |
| 2015 - 2016 | 1.28 (0.62, 1.95)             | <0.001  | 1.88 (1.15, 2.61)             | <0.001  | 1.59 (1.03, 2.20)             | <0.001  |
| 2017 - 2018 | 1.62 (1.00, 2.24)             | <0.001  | 2.26 (1.30, 3.21)             | <0.001  | 1.96 (1.34, 2.57)             | <0.001  |
| P for trend |                               | <0.001  |                               | <0.001  |                               | <0.001  |

Abbreviations: CI, confidence interval.

<sup>a</sup> Models adjusted for age, sex, race, education, family poverty income ratio, total energy intake and physical activity status.

**eTable 5. Change in prevalence of obesity by sex among adults in the United States, 2003-2018**

| Years       | Prevalence of obesity               |         |                                     |         |                                     |         |
|-------------|-------------------------------------|---------|-------------------------------------|---------|-------------------------------------|---------|
|             | Men                                 |         | Women                               |         | Both                                |         |
|             | Adjusted OR <sup>a</sup><br>(95%CI) | p-value | Adjusted OR <sup>a</sup><br>(95%CI) | p-value | Adjusted OR <sup>a</sup><br>(95%CI) | p-value |
| 2003 - 2004 | Reference                           |         | Reference                           |         | Reference                           |         |
| 2005 - 2006 | 1.03 (0.96, 1.09)                   | 0.402   | 1.04 (0.98, 1.09)                   | 0.197   | 1.03 (0.99, 1.07)                   | 0.184   |
| 2007 - 2008 | 1.03 (0.98, 1.08)                   | 0.229   | 1.03 (0.99, 1.07)                   | 0.193   | 1.03 (1.00, 1.06)                   | 0.084   |
| 2009 - 2010 | 1.07 (1.02, 1.13)                   | 0.008   | 1.04 (1.01, 1.08)                   | 0.026   | 1.06 (1.03, 1.09)                   | <0.001  |
| 2011 - 2012 | 1.06 (1.03, 1.11)                   | 0.028   | 1.08 (1.04, 1.13)                   | <0.001  | 1.07 (1.03, 1.11)                   | <0.001  |
| 2013 - 2014 | 1.06 (1.01, 1.11)                   | 0.011   | 1.08 (1.05, 1.14)                   | <0.001  | 1.08 (1.04, 1.11)                   | <0.001  |
| 2015 - 2016 | 1.11 (1.04, 1.18)                   | <0.001  | 1.12 (1.07, 1.17)                   | <0.001  | 1.11 (1.07, 1.16)                   | <0.001  |
| 2017 - 2018 | 1.17 (1.09, 1.24)                   | <0.001  | 1.14 (1.08, 1.21)                   | <0.001  | 1.15 (1.10, 1.21)                   | <0.001  |
| P for trend |                                     | <0.001  |                                     | <0.001  |                                     | <0.001  |

Abbreviations: CI, confidence interval; OR, odds ratio.

Crude model: we did not adjust other covariants.

<sup>a</sup> Models adjusted for age, sex, race, education, family poverty income ratio, total energy intake and physical activity status.

**eTable 6. Change in prevalence of overweight by sex among adults in the United States, 2003-2018**

| Years       | Prevalence of overweight            |         |                                     |         |                                     |         |
|-------------|-------------------------------------|---------|-------------------------------------|---------|-------------------------------------|---------|
|             | Men                                 |         | Women                               |         | Both                                |         |
|             | Adjusted OR <sup>a</sup><br>(95%CI) | p-value | Adjusted OR <sup>a</sup><br>(95%CI) | p-value | Adjusted OR <sup>a</sup><br>(95%CI) | p-value |
| 2003 - 2004 | Reference                           |         | Reference                           |         | Reference                           |         |
| 2005 - 2006 | 1.01 (0.96, 1.06)                   | 0.580   | 1.01 (0.95, 1.08)                   | 0.690   | 1.01 (0.97, 1.05)                   | 0.598   |
| 2007 - 2008 | 1.00 (0.96, 1.05)                   | 0.868   | 1.03 (0.98, 1.08)                   | 0.206   | 1.02 (0.98, 1.05)                   | 0.281   |
| 2009 - 2010 | 1.02 (0.97, 1.08)                   | 0.406   | 1.03 (0.98, 1.08)                   | 0.248   | 1.03 (0.99, 1.07)                   | 0.178   |
| 2011 - 2012 | 1.01 (0.96, 1.06)                   | 0.819   | 1.08 (1.03, 1.14)                   | 0.002   | 1.05 (1.00, 1.09)                   | 0.034   |
| 2013 - 2014 | 1.02 (0.98, 1.07)                   | 0.370   | 1.07 (1.02, 1.12)                   | 0.010   | 1.05 (1.01, 1.08)                   | 0.012   |
| 2015 - 2016 | 1.03 (0.98, 1.08)                   | 0.305   | 1.09 (1.04, 1.15)                   | 0.001   | 1.06 (1.02, 1.10)                   | 0.005   |
| 2017 - 2018 | 1.05 (1.00, 1.11)                   | 0.050   | 1.11 (1.05, 1.17)                   | <0.001  | 1.08 (1.04, 1.13)                   | <0.001  |
| P for trend |                                     | <0.001  |                                     | <0.001  |                                     | <0.001  |

Abbreviations: CI, confidence interval; OR, odds ratio.

<sup>a</sup> Models adjusted for age, sex, race, education, family poverty income ratio, total energy intake and physical activity status.

**STROBE 2007 (v4) checklist of items to be included in reports of observational studies in epidemiology\***  
**Checklist for cohort, case-control, and cross-sectional studies (combined)**

| Section/Topic             | Item # | Recommendation                                                                                                                                                                                                                                                                                                                                                                                                                                                         | Reported on page # |
|---------------------------|--------|------------------------------------------------------------------------------------------------------------------------------------------------------------------------------------------------------------------------------------------------------------------------------------------------------------------------------------------------------------------------------------------------------------------------------------------------------------------------|--------------------|
| Title and abstract        | 1      | (a) Indicate the study's design with a commonly used term in the title or the abstract                                                                                                                                                                                                                                                                                                                                                                                 | 2                  |
|                           |        | (b) Provide in the abstract an informative and balanced summary of what was done and what was found                                                                                                                                                                                                                                                                                                                                                                    | 2,3                |
| <b>Introduction</b>       |        |                                                                                                                                                                                                                                                                                                                                                                                                                                                                        |                    |
| Background/rationale      | 2      | Explain the scientific background and rationale for the investigation being reported                                                                                                                                                                                                                                                                                                                                                                                   | 5                  |
| Objectives                | 3      | State specific objectives, including any pre-specified hypotheses                                                                                                                                                                                                                                                                                                                                                                                                      | 5                  |
| <b>Methods</b>            |        |                                                                                                                                                                                                                                                                                                                                                                                                                                                                        |                    |
| Study design              | 4      | Present key elements of study design early in the paper                                                                                                                                                                                                                                                                                                                                                                                                                | 6                  |
| Setting                   | 5      | Describe the setting, locations, and relevant dates, including periods of recruitment, exposure, follow-up, and data collection                                                                                                                                                                                                                                                                                                                                        | 6                  |
| Participants              | 6      | (a) <i>Cohort study</i> —Give the eligibility criteria, and the sources and methods of selection of participants. Describe methods of follow-up<br><i>Case-control study</i> —Give the eligibility criteria, and the sources and methods of case ascertainment and control selection. Give the rationale for the choice of cases and controls<br><i>Cross-sectional study</i> —Give the eligibility criteria, and the sources and methods of selection of participants | 7                  |
|                           |        | (b) <i>Cohort study</i> —For matched studies, give matching criteria and number of exposed and unexposed<br><i>Case-control study</i> —For matched studies, give matching criteria and the number of controls per case                                                                                                                                                                                                                                                 |                    |
| Variables                 | 7      | Clearly define all outcomes, exposures, predictors, potential confounders, and effect modifiers. Give diagnostic criteria, if applicable                                                                                                                                                                                                                                                                                                                               | 6,7                |
| Data sources/ measurement | 8*     | For each variable of interest, give sources of data and details of methods of assessment (measurement). Describe comparability of assessment methods if there is more than one group                                                                                                                                                                                                                                                                                   | 6,7                |
| Bias                      | 9      | Describe any efforts to address potential sources of bias                                                                                                                                                                                                                                                                                                                                                                                                              | 6,7                |
| Study size                | 10     | Explain how the study size was arrived at                                                                                                                                                                                                                                                                                                                                                                                                                              |                    |
| Quantitative variables    | 11     | Explain how quantitative variables were handled in the analyses. If applicable, describe which groupings were chosen and why                                                                                                                                                                                                                                                                                                                                           | 6,7                |
| Statistical methods       | 12     | (a) Describe all statistical methods, including those used to control for confounding                                                                                                                                                                                                                                                                                                                                                                                  | 7,8                |
|                           |        | (b) Describe any methods used to examine subgroups and interactions                                                                                                                                                                                                                                                                                                                                                                                                    | 7,8                |
|                           |        | (c) Explain how missing data were addressed                                                                                                                                                                                                                                                                                                                                                                                                                            | 7                  |
|                           |        | (d) <i>Cohort study</i> —If applicable, explain how loss to follow-up was addressed<br><i>Case-control study</i> —If applicable, explain how matching of cases and controls was addressed                                                                                                                                                                                                                                                                              | 7,8                |



|                          |     |                                                                                                                                                                                                                                                                                                                                                                                                               |         |
|--------------------------|-----|---------------------------------------------------------------------------------------------------------------------------------------------------------------------------------------------------------------------------------------------------------------------------------------------------------------------------------------------------------------------------------------------------------------|---------|
|                          |     | <i>Cross-sectional study</i> —If applicable, describe analytical methods taking account of sampling strategy                                                                                                                                                                                                                                                                                                  |         |
|                          |     | (e) Describe any sensitivity analyses                                                                                                                                                                                                                                                                                                                                                                         |         |
| <b>Results</b>           |     |                                                                                                                                                                                                                                                                                                                                                                                                               |         |
| Participants             | 13* | (a) Report numbers of individuals at each stage of study—eg numbers potentially eligible, examined for eligibility, confirmed eligible, included in the study, completing follow-up, and analysed<br>(b) Give reasons for non-participation at each stage<br>(c) Consider use of a flow diagram                                                                                                               | 8       |
| Descriptive data         | 14* | (a) Give characteristics of study participants (eg demographic, clinical, social) and information on exposures and potential confounders<br>(b) Indicate number of participants with missing data for each variable of interest<br>(c) <i>Cohort study</i> —Summarise follow-up time (eg, average and total amount)                                                                                           | 8,9     |
| Outcome data             | 15* | <i>Cohort study</i> —Report numbers of outcome events or summary measures over time<br><i>Case-control study</i> —Report numbers in each exposure category, or summary measures of exposure<br><i>Cross-sectional study</i> —Report numbers of outcome events or summary measures                                                                                                                             | 8,9     |
| Main results             | 16  | (a) Give unadjusted estimates and, if applicable, confounder-adjusted estimates and their precision (eg, 95% confidence interval). Make clear which confounders were adjusted for and why they were included<br>(b) Report category boundaries when continuous variables were categorized<br>(c) If relevant, consider translating estimates of relative risk into absolute risk for a meaningful time period | 9,10,11 |
| Other analyses           | 17  | Report other analyses done—eg analyses of subgroups and interactions, and sensitivity analyses                                                                                                                                                                                                                                                                                                                | 10,11   |
| <b>Discussion</b>        |     |                                                                                                                                                                                                                                                                                                                                                                                                               |         |
| Key results              | 18  | Summarise key results with reference to study objectives                                                                                                                                                                                                                                                                                                                                                      | 11      |
| Limitations              | 19  | Discuss limitations of the study, taking into account sources of potential bias or imprecision. Discuss both direction and magnitude of any potential bias                                                                                                                                                                                                                                                    | 13,14   |
| Interpretation           | 20  | Give a cautious overall interpretation of results considering objectives, limitations, multiplicity of analyses, results from similar studies, and other relevant evidence                                                                                                                                                                                                                                    | 14      |
| Generalisability         | 21  | Discuss the generalisability (external validity) of the study results                                                                                                                                                                                                                                                                                                                                         | 14      |
| <b>Other information</b> |     |                                                                                                                                                                                                                                                                                                                                                                                                               |         |
| Funding                  | 22  | Give the source of funding and the role of the funders for the present study and, if applicable, for the original study on which the present article is based                                                                                                                                                                                                                                                 | 14,15   |

\*Give information separately for cases and controls in case-control studies and, if applicable, for exposed and unexposed groups in cohort and cross-sectional studies.

**Note:** An Explanation and Elaboration article discusses each checklist item and gives methodological background and published examples of transparent reporting. The STROBE checklist is best used in conjunction with this article (freely available on the Web sites of PLoS Medicine at <http://www.plosmedicine.org/>, Annals of Internal Medicine at <http://www.annals.org/>, and Epidemiology at <http://www.epidem.com/>). Information on the STROBE Initiative is available at [www.strobe-statement.org](http://www.strobe-statement.org).

# BMJ Open

## Trends in body mass index, overweight and obesity among adults in the United States, NHANES 2003 to 2018: a repeat cross-sectional survey

|                                 |                                                                                                                                                                                                                                                                                                                                |
|---------------------------------|--------------------------------------------------------------------------------------------------------------------------------------------------------------------------------------------------------------------------------------------------------------------------------------------------------------------------------|
| Journal:                        | <i>BMJ Open</i>                                                                                                                                                                                                                                                                                                                |
| Manuscript ID                   | bmjopen-2022-065425.R1                                                                                                                                                                                                                                                                                                         |
| Article Type:                   | Original research                                                                                                                                                                                                                                                                                                              |
| Date Submitted by the Author:   | 27-Sep-2022                                                                                                                                                                                                                                                                                                                    |
| Complete List of Authors:       | Li, Mingxi; Beijing Rehabilitation Hospital, Capital medical University<br>Gong, Weijun; Beijing Rehabilitation Hospital, Capital Medical University<br>Wang, Shidong; Beijing University of Chinese Medicine Affiliated Dongzhimen Hospital<br>Li, Zhe; Beijing University of Chinese Medicine Affiliated Dongzhimen Hospital |
| <b>Primary Subject Heading</b>: | Public health                                                                                                                                                                                                                                                                                                                  |
| Secondary Subject Heading:      | Public health                                                                                                                                                                                                                                                                                                                  |
| Keywords:                       | PUBLIC HEALTH, General endocrinology < DIABETES & ENDOCRINOLOGY, EPIDEMIOLOGY                                                                                                                                                                                                                                                  |
|                                 |                                                                                                                                                                                                                                                                                                                                |

SCHOLARONE™  
Manuscripts

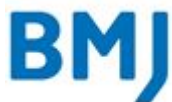

I, the Submitting Author has the right to grant and does grant on behalf of all authors of the Work (as defined in the below author licence), an exclusive licence and/or a non-exclusive licence for contributions from authors who are: i) UK Crown employees; ii) where BMJ has agreed a CC-BY licence shall apply, and/or iii) in accordance with the terms applicable for US Federal Government officers or employees acting as part of their official duties; on a worldwide, perpetual, irrevocable, royalty-free basis to BMJ Publishing Group Ltd ("BMJ") its licensees and where the relevant Journal is co-owned by BMJ to the co-owners of the Journal, to publish the Work in this journal and any other BMJ products and to exploit all rights, as set out in our [licence](#).

The Submitting Author accepts and understands that any supply made under these terms is made by BMJ to the Submitting Author unless you are acting as an employee on behalf of your employer or a postgraduate student of an affiliated institution which is paying any applicable article publishing charge ("APC") for Open Access articles. Where the Submitting Author wishes to make the Work available on an Open Access basis (and intends to pay the relevant APC), the terms of reuse of such Open Access shall be governed by a Creative Commons licence – details of these licences and which [Creative Commons](#) licence will apply to this Work are set out in our licence referred to above.

Other than as permitted in any relevant BMJ Author's Self Archiving Policies, I confirm this Work has not been accepted for publication elsewhere, is not being considered for publication elsewhere and does not duplicate material already published. I confirm all authors consent to publication of this Work and authorise the granting of this licence.

1  
2  
3  
4 **Trends in body mass index, overweight and obesity among adults in the United States, NHANES**

5  
6  
7 **2003 to 2018: a repeat cross-sectional survey**

8  
9  
10 **Authors:**

11  
12 1. Mingxi Li<sup>1&</sup>, MM 2. Weijun Gong<sup>1&</sup>, PhD 3. Shidong Wang<sup>2</sup>, PhD 4. Zhe Li<sup>2</sup>, PhD

13  
14  
15 **Author's affiliations:**

16  
17 1. Beijing Rehabilitation Hospital, Capital Medical University, Xixiazhuang Badachu Road,

18  
19 Shijingshan District, 100144, Beijing, China

20  
21 2. Dongzhimen Hospital, Beijing University of Chinese Medicine, No.5 Haiyuncang, Dongcheng

22  
23 District, 100700, Beijing, China

24  
25 &These authors contributed equally to this work and should be considered co-first authors

26  
27  
28  
29  
30  
31  
32 **Corresponding Author:**

33  
34 **Name:** Zhe Li

35  
36  
37 **Address:** Dongzhimen Hospital, Beijing University of Chinese Medicine, No.5 Haiyuncang,

38  
39 Dongcheng District, 100700, Beijing, China

40  
41  
42 **Phone numbers:** +86-01084013293

43  
44  
45 **E-mail address:** lizhetcm@126.com

46  
47  
48 **manuscript word count: 3580**

## Abstract

**Objectives:** To analyze detailed trends in adult obesity from 2003 through 2018, and provide the latest national estimates of adult obesity 2017-2018.

**Design, Setting ,and Participants:** Analysis of data including measured height and weight obtained from 42,266 adults aged  $\geq 20$  years in the National Health and Nutrition Examination Survey, a cross-sectional, nationally representative sample of the US population.

**Exposure:** Survey period.

**Primary Outcome Measures:** The mean body mass index and the prevalence of overweight and obesity.

**Results:** In 2017-2018, the prevalence of overweight (including obesity, BMI  $\geq 25$  kg/m<sup>2</sup>) and obesity (BMI  $\geq 30$  kg/m<sup>2</sup>) was 73.8% (95% CI, 71.1%-76.4%) and 42.8% (95% CI, 39.5%-46.1%), respectively. From 2003-2004 through 2017-2018, a significant increase in the prevalence of overweight (overall adjusted OR for 2017-2018 vs 2003-2004, 1.08 [95% CI, 1.04-1.13]) and obesity (overall adjusted OR for 2017-2018 vs 2003-2004, 1.15 [95% CI, 1.10-1.21]) was found among American adults. However, annual changes in mean BMI, the prevalence of overweight and obesity did not differ significantly before and after 2009-2010. The prevalence of overweight and obesity varied significantly by age, sex, race, education, daily total energy intake, economic conditions, and physical activity status (all  $P < 0.05$ ). A higher prevalence of obesity was found among older adults (aged 60-69 years), women, Non-Hispanic Blacks, and participants who were non-college educated, physically inactive, reported lower daily total energy intake, and had poor economic status.

**Conclusions:** Although the prevalence of adult obesity continues to rise, there have been no significant changes in the rising rate of adult obesity prevalence between 2003-2004 and 2017-2018. In 2017-

1  
2  
3  
4 2018, the prevalence of obesity was 42.8%, which puts 76 million Americans at risk for serious and  
5  
6 costly chronic conditions. The prevalence of overweight and obesity varied significantly by age, sex,  
7  
8 race, education, daily total energy intake, economic conditions, and physical activity status.  
9  
10

11 **Keywords:** American adults; body mass index; overweight/obesity; trends; NHANES  
12  
13

#### 14 **Strengths and limitations of this study**

15  
16

- 17 1. Our present study used a larger sample size as well as a longer time span.
- 18  
19 2. Although NHANES is designed to provide nationally representative estimates, it is a repeated cross-  
20  
21 sectional survey, which precludes within-individual change in BMI or obesity.  
22  
23
- 24 3. Our study assessed annual change in BMI and obesity, and the potential effects of the financial crisis  
25  
26 around 2009 among US adults.  
27  
28
- 29 4. Obesity was defined mainly based on measurements of BMI, which does not measure body fat  
30  
31 directly.  
32  
33  
34  
35  
36  
37  
38  
39  
40  
41  
42  
43  
44  
45  
46  
47  
48  
49  
50  
51  
52  
53  
54  
55  
56  
57  
58  
59  
60

## 1. Introduction

Obesity is one of the most common risk factors for chronic diseases such as diabetes mellitus, cardiovascular diseases, renal damage, and cancers that affects 670 million adults globally in 2016[1-7]. In the United States, the obesity rate has been on the rise since the 1980s[8]. By 2030, obesity is expected to reach a prevalence of 48.9% among American adults[9].

Some studies have reported on trends in obesity prevalence among American adults using the National Health and Nutrition Examination Survey (NHANES) data[8, 10-19]. Between 1976-1980 and 1988-1994, obesity prevalence among American adults increased from 14.5% to 22.5%[10]. The prevalence of obesity increased from 22.9% to 30.5% from 1988-1994 through 1999-2000, maintaining similar growth rates of about 8%[11]. Over the period 1999-2000 to 2017-2018, there were larger changes in the prevalence among men (from 27.5% to 43.0%) than seen previously and similar growth in prevalence among women (from 33.4% to 41.9%).[14] Most of the previous studies focused on differences in the prevalence of obesity by age, sex, and race. The differences in the prevalence of obesity by other covariates such as educational status, economic status, total daily energy intake, and physical activity status have been scarcely studied. The effects of the 2008–2009 global financial crisis on economic status, physical activity status, and daily total energy intake are still unknown. How these changes in economic status, physical activity status, and daily total energy intake may impact on the prevalence of overweight and obesity are less well understood.

In this study, our primary aim was to provide the latest national estimates of adult obesity and evaluate trends in mean body mass index(BMI) and adult obesity between 2003-2004 and 2017-2018. The secondary aims of our study were as follows: (1) To explore the changes in mean BMI and adult obesity before and after 2009 ( The 2008–2009 global financial crisis taken place). (2) To assess how

1  
2  
3  
4 these trends might vary by age, sex, race, educational status, economic status, total daily energy intake,  
5  
6 and physical activity status.  
7

## 8 9 **2. Materials and methods**

### 10 11 *2.1 Database and participants*

12  
13  
14 The NHANES is a nationally representative sample of the United States population, which  
15  
16 collects data from survey participants through household interviews, standardized physical  
17  
18 examinations, and laboratory tests in mobile examination centers[20]. The survey is unique in that it  
19  
20 combines interviews and physical examinations. The NHANES released data every 2 years to ensure  
21  
22 an adequate sample size for analyses and protect confidentiality. The survey examines a nationally  
23  
24 representative sample of about 5,000 people each year. The NHANES interview includes demographic,  
25  
26 socioeconomic, dietary, and health-related questions. The examination component consists of medical,  
27  
28 dental, and physiological measurements, as well as laboratory tests administered by highly trained  
29  
30 medical personnel. Detailed information on the NHANES procedures is available in the literature.[21]  
31  
32  
33  
34  
35  
36

37  
38 The present study used NHANES data including adults aged  $\geq 20$  years (N = 44,790) collected  
39  
40 between 2003-2004 and 2017-2018 with 8 survey cycles. Among the 44,790 participants (21,668 men  
41  
42 and 23,122 women), 42,266 had complete data on BMI, and were included in the final analysis.  
43  
44

### 45 46 *2.2 Data collection*

47  
48 Information about anthropometric measurements (including height and weight) and BMI was  
49  
50 obtained from examination data. Information about age, sex, race, education, and poverty income ratio  
51  
52 (PIR) was obtained from demographic data. Data on total energy intake was obtained from the total  
53  
54 nutrient intake file (second-day dietary interview), which contains a summary of an individual's  
55  
56 nutrition from all foods and beverages provided on the dietary recall. Total energy intake was  
57  
58  
59  
60



1  
2  
3  
4 categorized into tertiles. PIR was a ratio of family income to poverty threshold, which was calculated  
5  
6 by dividing family income by the poverty guidelines for the survey year. PIR was categorized into two  
7  
8 groups:  $<130\%$  and  $\geq 130\%$ . This classification of PIR has been used in a previous study.[22] Data on  
9  
10 physical activity was obtained from the physical activity questionnaire. Based on the 2018 Physical  
11  
12 Activity Guidelines for Americans, respondents who engaged in moderate-intensity aerobic activity for  
13  
14 150 min/week or vigorous-intensity aerobic activity for 75 min/week, or an equivalent combination of  
15  
16 both (1 min of vigorous-intensity physical activity is equivalent to 2 min of moderate intensity physical  
17  
18 activity) were defined as meeting the guidelines.[23] In our analysis, physical activity was categorized  
19  
20 into three levels: sufficiently active, insufficiently active, and inactive. Sufficiently active was defined  
21  
22 as a moderate-intensity aerobic activity for 150 min/week or vigorous-intensity aerobic activity for 75  
23  
24 min/week, or an equivalent combination of both. Insufficiently active was defined as some aerobic  
25  
26 activity but not enough to meet the guidelines (10-149 min/week). Inactive was defined as some  
27  
28 physical activity ( $< 10$  min/week) or reported no physical activity.[23] This classification of physical  
29  
30 activity has been used in previous studies.[24]

### 40 2.3 Statistical analysis

41  
42 According to WHO classification, we defined overweight, including obesity, as  $BMI \geq 25$   
43  
44  $kg/m^2$ ; and obesity as  $\geq 30 kg/m^2$ . Overall, the mean BMI and prevalence of overweight and obesity  
45  
46 in each survey cycle were calculated incorporating sample weights and adjusted for clusters and strata  
47  
48 of the complex sample design of the NHANES. Individuals with missing demographic information on  
49  
50 height or weight measurements are excluded from the analyses.

51  
52 In table 1, continuous variables were presented as weighted means and standard errors, while  
53  
54 categorical variables were presented as unweighted counts and weighted proportions. Comparisons  
55  
56  
57  
58  
59  
60

1  
2  
3  
4 between survey cycles were made using the wald-test (categorical variables) or Kruskal-Wallis rank-  
5  
6 sum test (skewed distribution).  
7

8  
9 We used survey-weighted generalized linear regression models to evaluate the trends in BMI,  
10  
11 overweight and obesity by survey period. Multivariate survey-weighted generalized linear regression  
12  
13 models were adjusted for age, sex, race, education, PIR, total energy intake, and activity status. A p-  
14  
15 value for trend was obtained by entering the median value of each category of BMI, the prevalence of  
16  
17 overweight and obesity as a continuous variable in the models, and rerunning the corresponding  
18  
19 survey-weighted generalized linear regression models.  
20  
21  
22  
23  
24

25 We used a previously described method to compare trends in mean BMI, overweight and obesity  
26  
27 before and after 2009-2010 to explore the potential impact of the financial crisis around 2008.[25] We  
28  
29 calculated mean BMI annual changes as the absolute value of the difference in mean BMI between the  
30  
31 start and end years divided by the total number of years covered. We also calculated the annual relative  
32  
33 changes in overweight and obesity prevalence as the absolute value of the difference in prevalence  
34  
35 between the start and end years divided by the prevalence in the start year annualized by accounting for  
36  
37 compounding. Welch's t-tests were used to compare trends in mean BMI, overweight and obesity  
38  
39 before and after 2009-2010.  
40  
41  
42  
43  
44

45 All simulations and analyses were performed using R software (R Foundation for Statistical  
46  
47 Computing, Vienna, Austria, Version 3.6.3) and the "survey" package (e.g., svymean and svyglm),  
48  
49 which considers sampling weights (16-year exam weight), clustering, and stratification of the complex  
50  
51 survey design.[26] A two-sided p-value <0.05 was considered to be statistically significant.  
52  
53  
54

#### 55 *2.4 Patient and Public Involvement*

56  
57

58 Approval was obtained from the National Center for Health Statistics Research Ethics Review  
59  
60

1  
2  
3  
4 Board, and all participants provided written informed consent. Therefore, there was no need for any  
5  
6 ethical consent in this study.  
7

### 8 9 **3. Results**

10  
11 The demographic characteristics of all participants according to survey year cycles are listed in  
12  
13 Table 1. In total, 42,266 participants (20,408 men and 21,858 women) were included in our final  
14  
15 analysis. The mean (SE) age of the weighted population was 47.11 (0.20) years, 47.97% of the  
16  
17 population were men, and the weighted mean (SE) BMI was 28.93 (0.07) kg/m<sup>2</sup>. Approximately two-  
18  
19 thirds (67.36%) were Non-Hispanic White, 11.41% were Non-Hispanic Black, 8.38% were Mexican  
20  
21 American, 5.33% were Hispanic and 7.51% were “other race”. More than 80% had a minimum of high  
22  
23 school education. Approximately 80% reported good economic status (PIR  $\geq$  130%). The average (SE)  
24  
25 daily energy intake was 2027.31 (7.96) kcal. About 65% reported meeting physical activity guidelines.  
26  
27 The prevalence of overweight and obesity increased overtime, whereas the inverse was true for normal  
28  
29 weight ( $p = 0.002$ ). The prevalence of overweight and obesity varied significantly by age, sex, race,  
30  
31 education, daily total energy intake, economic conditions, and physical activity status (Table S1).  
32  
33  
34  
35  
36  
37  
38  
39  
40  
41  
42  
43  
44  
45  
46  
47  
48  
49  
50  
51  
52  
53  
54  
55  
56  
57  
58  
59  
60

1  
2  
3  
4  
5  
6  
7  
8  
9  
10  
11  
12  
13  
14  
15  
16  
17  
18  
19  
20  
21  
22  
23  
24  
25  
26  
27  
28  
29  
30  
31  
32  
33  
34  
35  
36  
37  
38  
39  
40  
41  
42  
43  
44  
45  
46  
47  
48  
49  
50  
51  
52  
53  
54  
55  
56  
57  
58  
59  
60

For peer review only

Table 1. Baseline characteristics of participants. \*

National Health and Nutrition Examination Survey cycles †

| Characteristics       | Total<br>(n= 42,266) | 2003/2004<br>(n = 4,647) | 2005/2006<br>(n = 4,680) | 2007/2008<br>(n = 5,607) | 2009/2010<br>(n = 5,994) | 2011/2012<br>(n = 5,237) | 2013/2014<br>(n = 5,520) | 2015/2016<br>(n = 5,406) | 2017/2018<br>(n = 5,175) |
|-----------------------|----------------------|--------------------------|--------------------------|--------------------------|--------------------------|--------------------------|--------------------------|--------------------------|--------------------------|
| Age, years            | 47.11 ± 0.20         | 46.02 ± 0.52             | 46.42 ± 0.74             | 46.55 ± 0.44             | 46.92 ± 0.49             | 47.21 ± 0.82             | 47.45 ± 0.38             | 47.92 ± 0.58             | 48.14 ± 0.53             |
| Age, years (group)    |                      |                          |                          |                          |                          |                          |                          |                          |                          |
| 20 - 30               | 8,033 (20.5)         | 940 (21.0)               | 1,101 (20.5)             | 928 (20.5)               | 1,134 (21.1)             | 1,043 (20.6)             | 1,025 (20.6)             | 1,016 (20.2)             | 846 (19.7)               |
| 30 - 39               | 7,175 (18.4)         | 759 (20.3)               | 823 (19.8)               | 997 (19.1)               | 1,010 (18.1)             | 916 (17.5)               | 951 (17.4)               | 921 (17.4)               | 798 (19.0)               |
| 40 - 49               | 7,035 (19.4)         | 742 (21.6)               | 782 (21.2)               | 920 (21.2)               | 1,063 (19.8)             | 869 (19.4)               | 991 (18.9)               | 896 (17.7)               | 772 (16.3)               |
| 50 - 59               | 6,714 (18.1)         | 596 (16.6)               | 622 (16.9)               | 902 (17.8)               | 956 (18.2)               | 877 (18.9)               | 914 (18.1)               | 917 (18.8)               | 930 (19.3)               |
| 60 - 69               | 6,629 (12.8)         | 695 (10.2)               | 631 (11.0)               | 894 (11.0)               | 876 (12.0)               | 820 (13.5)               | 866 (14.1)               | 863 (14.5)               | 984 (15.1)               |
| ≥ 70                  | 6,680 (10.8)         | 915 (10.5)               | 721 (10.3)               | 966 (10.5)               | 955 (10.8)               | 712 (10.1)               | 773 (11.0)               | 793 (11.4)               | 845 (11.6)               |
| Sex, n (%)            |                      |                          |                          |                          |                          |                          |                          |                          |                          |
| Male, n (%)           | 20,408 (48.0)        | 2,237 (48.1)             | 2,237 (48.2)             | 2,746 (48.0)             | 2,889 (48.1)             | 2,585 (48.1)             | 2,638 (48.0)             | 2,638 (47.6)             | 2,493 (47.7)             |
| Female, n (%)         | 21,858 (52.0)        | 2,410 (51.9)             | 2,443 (51.8)             | 2,861 (52.0)             | 3,105 (51.9)             | 4,652 (51.9)             | 2,882 (52.0)             | 2,882 (52.4)             | 2,682 (52.3)             |
| Race                  |                      |                          |                          |                          |                          |                          |                          |                          |                          |
| Mexican American      | 6,805 (8.4)          | 931 (8.0)                | 944 (8.0)                | 967(8.3)                 | 1,096 (8.6)              | 509 (7.7)                | 737 (9.1)                | 936 (8.8)                | 685 (8.7)                |
| Other Hispanic        | 3,755 (5.3)          | 139 (3.5)                | 148 (3.4)                | 629 (4.9)                | 610 (5.0)                | 538 (6.5)                | 488 (5.6)                | 720 (6.4)                | 483 (6.9)                |
| Non-Hispanic White    | 18,120 (67.4)        | 2,464 (72.0)             | 2,338 (71.9)             | 2,625 (69.6)             | 2,865 (67.9)             | 1,917 (66.5)             | 2,366 (65.9)             | 1,767 (64.0)             | 1,778 (62.4)             |
| Non-Hispanic Black    | 9,094 (11.4)         | 910 (11.2)               | 1,064 (11.4)             | 1,155 (11.2)             | 1,087 (11.4)             | 1,382 (11.5)             | 1,135 (11.5)             | 1,142 (11.4)             | 1,219 (11.5)             |
| Other Race            | 4,492 (7.5)          | 203 (5.4)                | 186 (5.2)                | 231 (6.1)                | 336 (7.2)                | 891 (7.7)                | 794 (7.9)                | 841 (9.4)                | 1,010 (10.5)             |
| Education, n (%)      |                      |                          |                          |                          |                          |                          |                          |                          |                          |
| Less than high school | 10,814 (16.4)        | 1,362 (18.1)             | 1,290 (17.4)             | 1,728 (20.3)             | 1,710 (18.9)             | 1,235 (16.4)             | 1,191 (15.2)             | 1,277 (14.3)             | 1,021 (11.0)             |
| High school graduate  | 9,787 (23.6)         | 1,167 (27.1)             | 1,119 (25.0)             | 1,392 (25.4)             | 1,376 (22.9)             | 1,098 (19.8)             | 1,232 (21.6)             | 1,172 (20.8)             | 1,231 (27.0)             |

|    |                                |               |                |                |               |               |               |               |               |               |
|----|--------------------------------|---------------|----------------|----------------|---------------|---------------|---------------|---------------|---------------|---------------|
| 5  | Some college or AA degree      | 12,266 (31.4) | 1,263 (31.5)   | 1,334 (31.3)   | 1,440 (29.0)  | 1,679 (30.3)  | 1,576 (32.4)  | 1,704 (32.9)  | 1,602 (32.5)  | 1,668 (30.8)  |
| 6  | College graduate or above      | 9,345 (28.6)  | 847 (23.2)     | 931 (26.1)     | 1,041 (25.3)  | 1,216 (27.7)  | 1,324 (31.3)  | 1,389 (30.3)  | 1,352 (32.4)  | 1,245 (31.1)  |
| 7  | Poverty income ratio, n (%)    |               |                |                |               |               |               |               |               |               |
| 8  | < 130%                         | 12,129 (21.3) | 1,264 (20.5)   | 1,167 (17.1)   | 1,552 (20.4)  | 1,817 (21.7)  | 1,724 (24.6)  | 1,762 (24.7)  | 1,568 (20.9)  | 1,275 (20.1)  |
| 9  | ≥ 130%                         | 26,450 (78.7) | 3,119 (79.5)   | 3,294 (82.9)   | 3,536 (79.6)  | 3,592 (78.3)  | 3,078 (75.4)  | 3,335 (75.3)  | 3,280 (79.1)  | 3,216 (79.9)  |
| 10 | BMI, kg/m <sup>2</sup>         | 28.93 ± 0.07  | 28.24 ± 0.15   | 28.57 ± 0.23   | 28.54 ± 0.16  | 28.75 ± 0.13  | 28.73 ± 0.21  | 29.17 ± 0.17  | 29.42 ± 0.25  | 29.86 ± 0.26  |
| 11 | BMI, kg/m <sup>2</sup> (group) |               |                |                |               |               |               |               |               |               |
| 12 | < 25                           | 12,522 (30.7) | 1,480 (33.7)   | 1,432 (32.9)   | 1,628 (32.0)  | 1,684 (30.9)  | 1,714 (31.7)  | 1,700 (30.0)  | 1,517 (28.7)  | 1,367 (26.9)  |
| 13 | 25 - 30                        | 14,046 (32.9) | 1,632 (34.1)   | 1,608 (32.9)   | 1,934 (34.3)  | 2,030 (33.4)  | 1,677 (33.8)  | 1,767 (32.6)  | 1,731 (31.9)  | 1,667 (30.8)  |
| 14 | ≥ 30                           | 15,698 (36.4) | 1,535 (32.2)   | 1,640 (34.2)   | 2,045 (33.7)  | 2,280 (35.8)  | 1,846 (34.6)  | 2,053 (37.4)  | 2,158 (39.4)  | 2,141 (42.3)  |
| 15 | Total energy intake, Kcal/d    | 2,027.31±7.96 | 2,113.90±13.81 | 2,051.01±25.07 | 2016.62±20.87 | 2061.43±27.10 | 2014.61±18.59 | 2017.22±23.24 | 1970.20±23.28 | 1980.34±23.18 |
| 16 | Physical activity, n (%)       |               |                |                |               |               |               |               |               |               |
| 17 | Inactive                       | 8,504 (18.1)  | 150 (5.6)      | 142 (4.4)      | 1,656 (23.1)  | 1,711 (23.7)  | 355 (6.8)     | 1,562 (26.3)  | 1,565 (23.0)  | 1,363 (21.2)  |
| 18 | Insufficiently active          | 6,649 (17.5)  | 1,380 (50.2)   | 1,403 (47.5)   | 734 (13.0)    | 817 (13.7)    | 536 (10.3)    | 568 (9.7)     | 567 (9.9)     | 644 (11.3)    |
| 19 | Sufficiently active            | 23,320 (64.4) | 1,156 (44.2)   | 1,303 (48.2)   | 3,217 (63.8)  | 3,466 (62.7)  | 4,346 (82.9)  | 3,390 (64.0)  | 3,274 (67.1)  | 3,168 (67.5)  |

\* Data are presented incorporating sample weights and adjusted for clusters and strata of the complex sample design of the National Health and Nutrition Examination Survey (2003-2018).

† Values are presented as mean ± SE for continuous variables and unweighted numbers (weighted %) for categorical variables.

Abbreviations: AA, Associate of Arts; BMI, body mass index; CI, confidence interval.

1  
2  
3  
4 The mean (SE) BMI levels rose from 28.24 (0.07) kg/m<sup>2</sup> in 2003-2004 to 29.86(0.26) kg/m<sup>2</sup> in  
5  
6 2017-2018 (Table S2). In 2017-2018, the obesity prevalence was 42.8% (95% CI 39.5-46.1), increasing  
7  
8 more than 10% compared with 2003-2004 (32.3%, 95% CI 29.9-34.6) (Table S3). Consistent with the  
9  
10 increase in mean BMI and obesity prevalence, we found that the prevalence of overweight rose from  
11  
12 66.3% (95% CI 64.4-68.3) in 2003-2004 to 73.8 (95% CI 71.1-76.4) in 2017-2018 (Table S4). We used  
13  
14 survey-weighted generalized linear regression models to evaluate the trends in BMI, overweight and  
15  
16 obesity by survey period (Table 2). Compared with 2003-2004, the mean (SE) BMI increased by 1.96  
17  
18 kg/m<sup>2</sup> (95% CI 1.34-2.57,  $p < .001$ ) in 2017-2018 after adjusting for age, sex, race, education, PIR, and  
19  
20 activity status (Table 2, Table S5). The findings were similar for the prevalence of overweight and  
21  
22 obesity. Compared with 2003-2004, the adjusted odd ratios for the prevalence of overweight and  
23  
24 obesity were 1.08 (95% CI 1.04-1.13,  $p < .001$ ) and 1.15 (95% CI 1.10-1.21,  $p < .001$ ), respectively  
25  
26 (Table 2, Table S6, Table S7). However, we found no significant effect of the survey cycle on the  
27  
28 prevalence of overweight among men after adjusting for potential confounding variables (adjusted odd  
29  
30 ratio 1.05, 95%CI 1.00-1.11,  $p = 0.050$ ) (Table S7).  
31  
32  
33  
34  
35  
36  
37  
38  
39  
40  
41  
42  
43  
44  
45  
46  
47  
48  
49  
50  
51  
52  
53  
54  
55  
56  
57  
58  
59  
60

**Table 2. Change in BMI, overweight and obesity overtime among adults in the United States, 2003-2018**

| Years              | Mean BMI                      |         | Prevalence of overweight |         | Prevalence of obesity    |         |
|--------------------|-------------------------------|---------|--------------------------|---------|--------------------------|---------|
|                    | Adjusted $\beta$ *<br>(95%CI) | p-value | Adjusted OR *<br>(95%CI) | p-value | Adjusted OR *<br>(95%CI) | p-value |
| <b>2003 - 2004</b> | Reference                     |         | Reference                |         | Reference                |         |
| <b>2005 - 2006</b> | 0.38 (-0.23,0.99)             | 0.215   | 1.01 (0.97, 1.05)        | 0.598   | 1.03 (0.99, 1.07)        | 0.184   |
| <b>2007 - 2008</b> | 0.48 (0.04,0.93)              | 0.035   | 1.02 (0.98, 1.05)        | 0.281   | 1.03 (1.00, 1.06)        | 0.084   |
| <b>2009 - 2010</b> | 0.70 (0.26,1.15)              | 0.002   | 1.03 (0.99, 1.07)        | 0.178   | 1.06 (1.03, 1.09)        | <0.001  |
| <b>2011 - 2012</b> | 1.08 (0.55, 1.61)             | <0.001  | 1.05 (1.00, 1.09)        | 0.034   | 1.07 (1.03, 1.11)        | <0.001  |
| <b>2013 - 2014</b> | 1.18 (0.66, 1.70)             | <0.001  | 1.05 (1.01, 1.08)        | 0.012   | 1.08 (1.04, 1.11)        | <0.001  |
| <b>2015 - 2016</b> | 1.59 (1.03, 2.20)             | <0.001  | 1.06 (1.02,1.10)         | 0.005   | 1.11 (1.07, 1.16)        | <0.001  |
| <b>2017 - 2018</b> | 1.96 (1.34, 2.57)             | <0.001  | 1.08 (1.04, 1.13)        | <0.001  | 1.15 (1.10, 1.21)        | <0.001  |
| <b>P for trend</b> |                               | <0.001  |                          | <0.001  |                          | <0.001  |

Abbreviations: BMI, body mass index; CI, confidence interval; OR, odds ratio.

\* Models adjusted for age, sex, race, education, family poverty income ratio, total energy intake and physical activity status.



1  
2  
3  
4 Table 3 shows the annual change in mean BMI as well as overweight and obesity prevalence  
5  
6 during 2003-2004 to 2009-2010 and 2011-2012 to 2017-2018. The increase of mean BMI was  
7  
8 somewhat bigger after 2009-2010 (0.12 kg/m<sup>2</sup> annual relative increase, 95% CI 0.06-0.19) compared  
9  
10 with before 2009-2010 (0.07 kg/m<sup>2</sup> annual relative increase, 95% CI 0.02-0.13). But this difference  
11  
12 was not statistically significant (p = 0.848). Annual changes in the prevalence of overweight and  
13  
14 obesity were similar. The acceleration in the rise of obesity prevalence was mainly due to an increase in  
15  
16 the prevalence of obesity among those who are in a better economic position (0.40% annual relative  
17  
18 increase, 95% CI -1.11-1.93 vs 2.97% annual relative increase, 95% CI 1.75-4.20). Again, this  
19  
20 difference was not statistically different (p=0.985). Likewise, for the prevalence of overweight, the  
21  
22 annual increase was also numerically faster after 2009-2010 compared with before 2009-2010 (0.6%,  
23  
24 95% CI -0.08-1.27 vs 0.72%, 0.15-1.29; p = 0.584). Remarkably, the prevalence of overweight was  
25  
26 nearly unchanged among those with poor economic conditions after 2009-2010 (0.00 annual relative  
27  
28 increase, 95% CI -0.96-0.97) compared with before 2009-2010 (1.82 annual relative increase, 95% CI  
29  
30 0.55-3.10, p = 0.037). Meanwhile, both men and women with poor economic conditions slowed down  
31  
32 the increase of BMI and the prevalence of overweight and obesity after 2009-2010 compared with  
33  
34 before 2009-2010. In contrast, a bigger increase was found among those with good economic  
35  
36 conditions after 2009-2010, although without statistical significance (p > 0.05).  
37  
38  
39  
40  
41  
42  
43  
44  
45  
46  
47  
48  
49  
50  
51  
52  
53  
54  
55  
56  
57  
58  
59  
60

**Table 3. Annual change in BMI, overweight, obesity and economic status during 2003-2010 and 2011-2018**

| Characteristic                                             | Men                |                     |          | Women               |                     |          | Both                |                     |              |
|------------------------------------------------------------|--------------------|---------------------|----------|---------------------|---------------------|----------|---------------------|---------------------|--------------|
|                                                            | 2003/04-2009/2010  | 2011/12-2017/2018   | p-value* | 2003/2004-2009/2010 | 2011/2012-2017/2018 | p-value* | 2003/2004-2009/2010 | 2011/2012-2017/2018 | p-value*     |
| <b>Change (95% CI) in mean BMI (kg/m<sup>2</sup>)</b>      |                    |                     |          |                     |                     |          |                     |                     |              |
| Overall                                                    | 0.07 (0.02, 0.13)  | 0.12 (0.06, 0.19)   | 0.848    | 0.65 (-0.01, 0.14)  | 0.13 (-0.39, 2.76)  | 0.846    | 0.07 (0.02, 0.13)   | 0.12 (0.06, 0.19)   | 0.848        |
| PIR<130%                                                   | 0.17 (0.02, 0.32)  | 0.08 (-0.06, 0.22)  | 0.245    | 0.17 (0.04, 0.30)   | 0.06 (-0.09, 0.21)  | 0.186    | 0.17 (0.05, 0.28)   | 0.07 (-0.04, 0.18)  | 0.170        |
| PIR≥130%                                                   | 0.07 (-0.01, 0.14) | 0.11 (0.04, 0.17)   | 0.716    | 0.15 (-0.04, 0.13)  | 0.16 (0.07, 0.25)   | 0.943    | 0.06 (0.00, 0.11)   | 0.13 (0.07, 0.20)   | 0.922        |
| <b>Percentage change (95% CI) in overweight prevalence</b> |                    |                     |          |                     |                     |          |                     |                     |              |
| Overall                                                    | 0.69 (-0.18, 1.56) | 0.50 (-0.24, 1.24)  | 0.393    | 0.50 (-0.45, 1.47)  | 0.95 (0.30, 1.60)   | 0.746    | 0.60 (-0.08, 1.27)  | 0.72 (0.15, 1.29)   | 0.584        |
| PIR<130%                                                   | 2.64 (-0.52, 4.82) | -0.06 (-1.60, 1.50) | 0.050    | 1.33 (0.10, 2.56)   | 0.03 (-0.97, 1.04)  | 0.096    | 1.82 (0.55, 3.10)   | 0.00 (-0.96, 0.97)  | <b>0.037</b> |
| PIR≥130%                                                   | 0.36 (-0.59, 1.31) | 0.64 (-0.03, 1.33)  | 0.646    | 0.28 (-0.81, 1.40)  | 1.31 (0.55, 2.08)   | 0.900    | 0.30 (-0.50, 1.10)  | 0.95 (0.34, 1.56)   | 0.844        |
| <b>Percentage change (95% CI) in obesity prevalence</b>    |                    |                     |          |                     |                     |          |                     |                     |              |
| Overall                                                    | 1.93 (0.10, 3.76)  | 2.29 (0.54, 4.02)   | 0.589    | 1.15 (-0.39, 2.76)  | 1.71 (0.56, 2.84)   | 0.699    | 1.51 (0.24, 2.81)   | 1.99 (0.93, 3.04)   | 0.689        |
| PIR<130%                                                   | 3.16 (0.12, 6.19)  | 2.38 (-0.48, 5.25)  | 0.378    | 2.38 (0.34, 4.46)   | 0.95 (-0.77, 2.67)  | 0.192    | 2.56 (0.81, 4.31)   | 1.47 (0.00, 2.95)   | 0.223        |
| PIR≥130%                                                   | 1.93 (-0.03, 3.85) | 2.08 (-0.38, 3.77)  | 0.536    | 0.97 (-1.00, 3.00)  | 2.21 (0.62, 3.78)   | 0.796    | 0.40 (-1.11, 1.93)  | 2.97 (1.75, 4.20)   | 0.985        |

Abbreviations: BMI, body mass index; CI, confidence interval; PIR poverty income ratio.

\* p-value for difference in annual changes for 2004-2010 versus 2011-2018.

Graphical representations of the changes in the distribution of mean BMI, overweight and obesity prevalence are shown in Figure1 and Figure2. Figure 1 shows the changes in mean BMI across years stratified by age, PIR, educationin, and race. Similar trends in mean BMI were found across subgroups of age, PIR, education, race, sex, and activity status. Overall, the mean BMI generally increased overtime among all participants. In the age subgroup, the lowest mean BMI was found in those aged 20–30 years, followed by those aged > 70 years (Table S2, Figure1). Compared to good economic conditions, BMI was higher for those with poor economic conditions since 2005-2006. In 2017-2018, participants with poor economic conditions had a mean BMI of 1.68 kg/m<sup>2</sup> lower than those with good economic conditions. Between 2003-2004 and 2017-2018, lower mean BMI was found among participants with a higher educational level than among those with a lower educational level. A similar trend was found in the subgroup stratified by race. In 2017-2018, the mean (SE) BMI for all participants was 29.86 ± 0.26 kg/m<sup>2</sup>, with the highest mean BMI in Non-Hispanic Blacks (31.29 ± 0.29) and the lowest BMI in other race populations (28.21 ± 0.39) (Table1, Figure1). Figure 2 shows the changes in mean BMI across years stratified by sex and activity status. Changes in overweight and obesity prevalence across years stratified by sex are also shown in Figure 2. From 2003-2004 to 2017-2018, the mean BMI rose similarly in both sexes, by about 1.61 kg/m<sup>2</sup> totally for men and 1.64 kg/m<sup>2</sup> for women (Table S2, Figure2). Meanwhile, men had a lower BMI than women. In the activity status subgroup, there was a more complex pattern, with a decrease in mean BMI in 2011-2012 among those who were inactive and insufficiently active. Although there was an acceleration in the rise of mean BMI among those who were sufficiently active, their mean BMI was the lowest.

The trends in increasing obesity prevalence overtime were largely consistent for men and women. In 2003-2004, men had lower mean BMI and lower prevalence of obesity than women, but a reversed

1  
2  
3  
4 pattern was seen in 2017-2018. In 2017-2018, men had a higher prevalence of obesity than women  
5  
6 (43.3%, 95% CI 38.2-48.4 vs 42.3%, 38.6-46.0) (Table S3, Figure2).  
7

8  
9 The trends in increasing overweight prevalence overtime were similar for both sexes. Overall, the  
10  
11 overweight prevalence in men was higher than in women. Between 2003-2004 and 2017-2018, the  
12  
13 overweight rose similarly in both sexes, by about 1.61 kg/m<sup>2</sup> totally for men and 1.64 kg/m<sup>2</sup> for  
14  
15 women. As for overweight prevalence trends, there was increasing prevalence of men from 70.6%  
16  
17 (95%CI 68.0-73.0) in 2003-2004 to 77.4% (95%CI 73.9-80.9) in 2017-2018, and of women from  
18  
19 62.5% (95%CI 59.9-65.9) to 70.5% (95%CI 67.3-73.6) (Table S4, Figure2).  
20  
21  
22  
23  
24

#### 25 **4.Discussion**

26  
27 Our present study showed that the prevalence of obesity among American adults increased from  
28  
29 32.3% in 2003-2004 to 42.8% in 2017-2018. These results are broadly consistent with the results  
30  
31 reported by National Center for Health Statistics (NCHS). For the years 2017-2018, the prevalence of  
32  
33 obesity was 42.3% among men and 43.3% among women. Compared with 2003-2004, the mean BMI  
34  
35 increased by 1.94 kg/m<sup>2</sup>, by 15% for obesity prevalence, and by 8% for overweight prevalence in 2017-  
36  
37 2018 after adjusting for age, sex, race, education, PIR, and activity status. The rises in mean BMI and  
38  
39 the prevalence of both overweight and obesity were somewhat bigger after 2009-2010 compared with  
40  
41 before 2009-2010. However, the difference was not statistically significant.  
42  
43  
44  
45  
46  
47

48 The levels and changes in trends of mean BMI and obesity prevalence among American adults  
49  
50 have been covered by numerous studies.[9, 15, 27-29] The NCHS reported that the age-adjusted  
51  
52 obesity prevalence among adults was 42.4% in 2017-2018, and obesity prevalence increased among  
53  
54 adults from 1999-2000 through 2017-2018.[15] Another study using data from the 2005–2014  
55  
56 NHANES also showed that a statistically significant positive linear trend in obesity prevalence were  
57  
58  
59  
60

1  
2  
3  
4 present in women but not in men.[28] One recent study suggested that the prevalence of obesity among  
5  
6 US adults rose from 35.4% in 2011-2012 to 43.4% in 2017-2018. From 2011-2012 through 2017-2018,  
7  
8 the mean BMI rose from 28.7 kg/m<sup>2</sup> to 29.8 kg/m<sup>2</sup>. [29] Our results were broadly consistent with the  
9  
10 results of the above studies at each timepoint. However, our present study used a larger sample size as  
11  
12 well as a longer time span.  
13  
14  
15

16  
17 To the best of our knowledge, few studies have assessed annual change in BMI and obesity and  
18  
19 the potential effects of the financial crisis around 2009 among US adults. A previous study conducted  
20  
21 using NHANES data 1999–2008 showed that the increases in the prevalence of obesity do not appear  
22  
23 to be continuing at the same rate from 1999-2000 through 2007-2008. When they adjusted for age and  
24  
25 race group with survey period as a categorical variable, there were no significant differences in the  
26  
27 prevalence of obesity between 2003-2004 and 2007-2008 for men.[27] This is broadly consistent with  
28  
29 our findings. In our study, statistically significant differences in mean BMI and obesity prevalence for  
30  
31 both sexes were found since 2009-2010 (Table 2). Furthermore, a previous study evaluated the effects  
32  
33 of the economic crisis on dietary quality and obesity rates.[30] They found that economic changes can  
34  
35 modify diet quality and increase the risk to have a poor diet or being obese, which was mainly due to  
36  
37 the changes in economic and work conditions. In our study, the impact of economic conditions on BMI  
38  
39 was complex. A significant increase in mean BMI was found among both the poor and the rich. The  
40  
41 overall BMI was higher for those with poor economic conditions since 2005-2006 compared to good  
42  
43 economic conditions (Figure 1). However, the acceleration in the rise of obesity prevalence was mainly  
44  
45 due to an increase in the prevalence of obesity among those who are in a better economic position  
46  
47 (Table 3). Interestingly, there was no statistical difference in annual change in obesity prevalence  
48  
49 before and after the financial crisis. This may be mainly due to the increase in the proportion of the  
50  
51  
52  
53  
54  
55  
56  
57  
58  
59  
60

1  
2  
3  
4 poor after the financial crisis. The proportion of the poor increased from 21.68% in 2009-2010 to  
5  
6 24.6% in 2011-2012. This trend continued until 2015. In our present study, although the differences  
7  
8 were not statistically significant, numerical larger increases in mean BMI and the prevalence of both  
9  
10 overweight and obesity were found after 2009-2010 compared with before 2009-2010.  
11  
12

13  
14 Interestingly, participants in the highest daily total energy intake tertile had the lowest BMIs  
15  
16 compared with those in the lowest daily total energy intake tertile (28.97 kg/m<sup>2</sup> vs. 29.30 kg/m<sup>2</sup>). The  
17  
18 findings were similar for the prevalence of obesity (36.7% vs. 39.9%) and overweight ( 69.8% vs.  
19  
20 70.9%). Thus, we analyzed the characteristics of the participants according to tertiles of daily total  
21  
22 energy intake (Table S8). Compared with those in the lowest daily total energy intake tertile,  
23  
24 participants in the highest daily total energy intake tertile had higher proportions of Non-Hispanic  
25  
26 Whites and individuals who were college educated (college degree or higher), sufficiently physically  
27  
28 active, and had good economic status. This might in part be related to the lower BMI and prevalence of  
29  
30 obesity.  
31  
32  
33  
34  
35  
36  
37

38 In addition, although the mean BMI and the prevalence of overweight and obesity increased  
39  
40 overtime, the mean daily intake of energy decreased from 2003-2004 to 2017-2018 ( $2,113.90 \pm 7.96$   
41  
42 Kcal/d vs  $1,980.34 \pm 7.96$  Kcal/d,  $p < 0.001$ ). Several mechanisms may explain this phenomenon: (1)  
43  
44 The reduction in energy intake may lead to hunger increases and energy expenditure declines-  
45  
46 physiological adaptations that tend to push body weight back up.[31] (2) In the US, carbohydrate intake  
47  
48 has increased markedly, resulting in major increases in the proportion of calories from  
49  
50 carbohydrates.[32] A high-carbohydrate diet could produce postprandial hyperinsulinemia, which  
51  
52 promotes energy storage and causes an increase in body weight.[33]  
53  
54  
55  
56  
57

58 In our study, lower mean BMI was found among participants with a higher educational level than  
59  
60

1  
2  
3  
4 among those with a lower educational level. A previous study showed that a higher educational level is  
5  
6 related to a lower BMI level among mid-age women, mainly on account of selection.[34] Theories of  
7  
8 selection note that low-BMI children tend to have higher grades and test scores, and better chances of  
9  
10 completing secondary and tertiary education. It is also reported that young overweight/obese women  
11  
12 were more likely to have a lower educational level.[34] It might be explained by the following reasons:  
13  
14 (1) Children with a lower BMI tend to come from socioeconomically advantaged families, and have  
15  
16 better chances of completing their studies.[34] (2) Children with a lower BMI may benefit from  
17  
18 physical activity, which may have a positive influence on academic performance.[35] (3) Negative  
19  
20 views on high-BMI children may impair their academic performance.[36] Our results also show that  
21  
22 women had a higher prevalence of obesity than men. This may be due to estrogen-reducing  
23  
24 postprandial fatty acid oxidation, leading to an increase in body fat.[37] Meanwhile, It was less likely  
25  
26 for women to be physically active than for men.  
27  
28  
29  
30  
31  
32  
33  
34

35 In our study, about 67.4% reported meeting physical activity guidelines in 2017-2018. As reported  
36  
37 by National Center for Health Statistics (NCHS), 53.3% of adults aged 18 and over met the Physical  
38  
39 Activity Guidelines for aerobic physical activity in 2018. However, the NCHS estimates were limited  
40  
41 to leisure-time physical activity only. Our estimates were based on the Global Physical Activity  
42  
43 Questionnaire, including both daily activities (work activities) and leisure time activities. For this  
44  
45 reason, our estimates were larger than those reported by NCHS reports.  
46  
47  
48  
49

50 Although NHANES is designed to provide nationally representative estimates, it is a repeated  
51  
52 cross-sectional survey, which precludes within-individual change in BMI or obesity. Meanwhile,  
53  
54 obesity was defined mainly based on measurements of BMI, which does not measure body fat directly.  
55  
56 Although BMI is highly correlated with overall body fat[38], the relationship between BMI and body  
57  
58  
59  
60

1  
2  
3  
4 fat varies by sex, age, and race-ethnicity[39]. In addition, the study used a large nationally  
5  
6 representative sample of adults from the United States. Thus, our results are only generalizable to the  
7  
8 US population. Therefore, there are certain limitations in the extrapolation of the study results.  
9  
10

11 The COVID-19 global pandemic has changed the lifestyle of most Americans. It has been  
12  
13 reported that approaches designed to contain the spread of COVID-19 such as lockdowns might  
14  
15 exacerbate the prevalence of obesity.[40] The effects of the COVID-19 global pandemic on BMI and  
16  
17 the prevalence of obesity are yet to be examined. Regrettably, information about anthropometric  
18  
19 measurements in NHANES after 2018 has not been released. Additional follow-up studies are required  
20  
21 to answer these questions.  
22  
23  
24  
25

## 26 27 **5. Conclusions**

28  
29 Although the prevalence of adult obesity continues to rise, there have been no significant changes  
30  
31 in the rising rate of adult obesity prevalence between 2003-2004 and 2017-2018. In 2017-2018, the  
32  
33 prevalence of obesity was 42.8%, which puts 76 million Americans at risk for serious and costly  
34  
35 chronic conditions. The prevalence of overweight and obesity varied significantly by age, sex, race,  
36  
37 education, daily total energy intake, economic conditions, and physical activity status.  
38  
39  
40  
41

## 42 43 **Author contributions:**

44  
45 WG, ZL: designed the research; ZL and ML: analyzed the data; ZL: wrote the paper; ZL: had full  
46  
47 access to all the data in the study and takes responsibility for the integrity of the data and the accuracy  
48  
49 of the data analysis; WG, ZL, ML, and SW: assisted with interpretation of the results and critically  
50  
51 reviewed the manuscript; and all authors: read and approved the final manuscript. The authors report no  
52  
53 conflicts of interest.  
54  
55  
56

## 57 58 **Acknowledgements**



1  
2  
3  
4 None.  
5

6 **Funding sources**  
7

8  
9 This research received no specific grant from any funding agency in the public, commercial or  
10  
11 not-for-profit sectors.  
12

13  
14 **Competing interests statement**  
15

16  
17 None.  
18

19 **Data sharing statement**  
20

21  
22 Data described in the article are publicly and freely available without restriction at  
23  
24 <https://www.cdc.gov/nchs/nhanes/index.htm>.  
25

26  
27 **Ethics approval**  
28

29  
30 Approval was obtained from the National Center for Health Statistics Research Ethics Review  
31  
32 Board, and all participants provided written informed consent (Approval number: Protocol#98-12,  
33  
34 #2005-06, #11-17, #18-01, <https://www.cdc.gov/nchs/nhanes/irba98.htm>).  
35  
36  
37  
38  
39  
40  
41  
42  
43  
44  
45  
46  
47  
48  
49  
50  
51  
52  
53  
54  
55  
56  
57  
58  
59  
60

## Reference

1. Poirier P, Giles TD, Bray GA, Hong Y, Stern JS, Pi-Sunyer FX, Eckel RH: **Obesity and cardiovascular disease: pathophysiology, evaluation, and effect of weight loss: an update of the 1997 American Heart Association Scientific Statement on Obesity and Heart Disease from the Obesity Committee of the Council on Nutrition, Physical Activity, and Metabolism.** *Circulation* 2006, **113**:898-918.
2. Petrelli F, Cortellini A, Indini A, Tomasello G, Ghidini M, Nigro O, Salati M, Dottorini L, Iaculli A, Varricchio A, et al: **Association of Obesity With Survival Outcomes in Patients With Cancer: A Systematic Review and Meta-analysis.** *JAMA Netw Open* 2021, **4**:e213520.
3. Islami F, Goding Sauer A, Gapstur SM, Jemal A: **Proportion of Cancer Cases Attributable to Excess Body Weight by US State, 2011-2015.** *JAMA Oncol* 2019, **5**:384-392.
4. Piché ME, Tchernof A, Després JP: **Obesity Phenotypes, Diabetes, and Cardiovascular Diseases.** *Circ Res* 2020, **126**:1477-1500.
5. Emerging Risk Factors C, Wormser D, Kaptoge S, Di Angelantonio E, Wood AM, Pennells L, Thompson A, Sarwar N, Kizer JR, Lawlor DA, et al: **Separate and combined associations of body-mass index and abdominal adiposity with cardiovascular disease: collaborative analysis of 58 prospective studies.** *Lancet* 2011, **377**:1085-1095.
6. Bardou M, Barkun AN, Martel M: **Obesity and colorectal cancer.** *Gut* 2013, **62**:933-947.
7. Collaboration NCDRF: **Worldwide trends in body-mass index, underweight, overweight, and obesity from 1975 to 2016: a pooled analysis of 2416 population-based measurement studies in 128.9 million children, adolescents, and adults.** *Lancet* 2017, **390**:2627-2642.
8. Hales CM, Fryar CD, Carroll MD, Freedman DS, Ogden CL: **Trends in Obesity and Severe Obesity Prevalence in US Youth and Adults by Sex and Age, 2007-2008 to 2015-2016.** *Jama* 2018, **319**:1723-1725.
9. Ward ZJ, Bleich SN, Cradock AL, Barrett JL, Giles CM, Flax C, Long MW, Gortmaker SL: **Projected U.S. State-Level Prevalence of Adult Obesity and Severe Obesity.** *N Engl J Med* 2019, **381**:2440-2450.
10. Flegal KM, Carroll MD, Kuczmarski RJ, Johnson CL: **Overweight and obesity in the United States: prevalence and trends, 1960-1994.** *Int J Obes Relat Metab Disord* 1998, **22**:39-47.
11. Flegal KM, Carroll MD, Ogden CL, Johnson CL: **Prevalence and trends in obesity among US adults, 1999-2000.** *Jama* 2002, **288**:1723-1727.
12. Flegal KM, Carroll MD, Kit BK, Ogden CL: **Prevalence of obesity and trends in the distribution of body mass index among US adults, 1999-2010.** *Jama* 2012, **307**:491-497.
13. Ogden CL, Carroll MD, Kit BK, Flegal KM: **Prevalence of childhood and adult obesity in the United States, 2011-2012.** *Jama* 2014, **311**:806-814.
14. Ogden CL, Fryar CD, Martin CB, Freedman DS, Carroll MD, Gu Q, Hales CM: **Trends in Obesity Prevalence by Race and Hispanic Origin-1999-2000 to 2017-2018.** *Jama* 2020, **324**:1208-1210.
15. Hales CM, Carroll MD, Fryar CD, Ogden CL: **Prevalence of Obesity and Severe Obesity Among Adults: United States, 2017-2018.** *NCHS Data Brief* 2020:1-8.
16. Ellison-Barnes A, Johnson S, Gudzone K: **Trends in Obesity Prevalence Among Adults Aged 18 Through 25 Years, 1976-2018.** *Jama* 2021, **326**:2073-2074.

- 1
  - 2
  - 3
  - 4
  - 5
  - 6
  - 7
  - 8
  - 9
  - 10
  - 11
  - 12
  - 13
  - 14
  - 15
  - 16
  - 17
  - 18
  - 19
  - 20
  - 21
  - 22
  - 23
  - 24
  - 25
  - 26
  - 27
  - 28
  - 29
  - 30
  - 31
  - 32
  - 33
  - 34
  - 35
  - 36
  - 37
  - 38
  - 39
  - 40
  - 41
  - 42
  - 43
  - 44
  - 45
  - 46
  - 47
  - 48
  - 49
  - 50
  - 51
  - 52
  - 53
  - 54
  - 55
  - 56
  - 57
  - 58
  - 59
  - 60
17. Baskin ML, Ard J, Franklin F, Allison DB: **Prevalence of obesity in the United States.** *Obes Rev* 2005, **6**:5-7.
18. Ogden CL, Carroll MD, Kit BK, Flegal KM: **Prevalence of obesity in the United States, 2009-2010.** *NCHS Data Brief* 2012:1-8.
19. Kwak YE, McMillan R, McDonald EKT: **Trends in Overweight and Obesity Self-awareness Among Adults With Overweight or Obesity in the United States, 1999 to 2016.** *Ann Intern Med* 2021, **174**:721-723.
20. Zipf G, Chiappa M, Porter KS, Ostchega Y, Lewis BG, Dostal J: **National health and nutrition examination survey: plan and operations, 1999-2010.** *Vital Health Stat 1* 2013:1-37.
21. Johnson CL, Paulose-Ram R, Ogden CL, Carroll MD, Kruszon-Moran D, Dohrmann SM, Curtin LR: **National health and nutrition examination survey: analytic guidelines, 1999-2010.** *Vital Health Stat 2* 2013:1-24.
22. Fadeyev K, Nagao-Sato S, Reicks M: **Nutrient and Food Group Intakes among U.S. Children (2-5 Years) Differ by Family Income to Poverty Ratio, NHANES 2011-2018.** *Int J Environ Res Public Health* 2021, **18**.
23. Piercy KL, Troiano RP, Ballard RM, Carlson SA, Fulton JE, Galuska DA, George SM, Olson RD: **The Physical Activity Guidelines for Americans.** *JAMA* 2018, **320**:2020-2028.
24. Kim D, Konyn P, Cholankeril G, Ahmed A: **Physical Activity Is Associated With Nonalcoholic Fatty Liver Disease and Significant Fibrosis Measured by FibroScan.** *Clin Gastroenterol Hepatol* 2021.
25. Wang L, Zhou B, Zhao Z, Yang L, Zhang M, Jiang Y, Li Y, Zhou M, Wang L, Huang Z, et al: **Body-mass index and obesity in urban and rural China: findings from consecutive nationally representative surveys during 2004-18.** *Lancet* 2021, **398**:53-63.
26. Curtin LR, Mohadjer LK, Dohrmann SM, Montaquila JM, Kruszon-Moran D, Mirel LB, Carroll MD, Hirsch R, Schober S, Johnson CL: **The National Health and Nutrition Examination Survey: Sample Design, 1999-2006.** *Vital Health Stat 2* 2012:1-39.
27. Flegal KM, Carroll MD, Ogden CL, Curtin LR: **Prevalence and trends in obesity among US adults, 1999-2008.** *JAMA* 2010, **303**:235-241.
28. Flegal KM, Kruszon-Moran D, Carroll MD, Fryar CD, Ogden CL: **Trends in Obesity Among Adults in the United States, 2005 to 2014.** *JAMA* 2016, **315**:2284-2291.
29. Liu B, Du Y, Wu Y, Snetselaar LG, Wallace RB, Bao W: **Trends in obesity and adiposity measures by race or ethnicity among adults in the United States 2011-18: population based study.** *BMJ* 2021, **372**:n365.
30. Norte A, Sospedra I, Ortiz-Moncada R: **Influence of economic crisis on dietary quality and obesity rates.** *Int J Food Sci Nutr* 2019, **70**:232-239.
31. Leibel RL, Rosenbaum M, Hirsch J: **Changes in energy expenditure resulting from altered body weight.** *N Engl J Med* 1995, **332**:621-628.
32. Ford ES, Dietz WH: **Trends in energy intake among adults in the United States: findings from NHANES.** *Am J Clin Nutr* 2013, **97**:848-853.
33. Ludwig DS, Ebbeling CB: **The Carbohydrate-Insulin Model of Obesity: Beyond "Calories In, Calories Out".** *JAMA Intern Med* 2018, **178**:1098-1103.
34. Benson R, von Hippel PT, Lynch JL: **Does more education cause lower BMI, or do lower-BMI individuals become more educated? Evidence from the National Longitudinal Survey of Youth 1979.** *Soc Sci Med* 2018, **211**:370-377.

- 1  
2  
3  
4  
5  
6  
7  
8  
9  
10  
11  
12  
13  
14  
15  
16  
17  
18  
19  
20  
21  
22  
23  
24  
25
35. Castelli DM, Hillman CH, Buck SM, Erwin HE: **Physical fitness and academic achievement in third- and fifth-grade students.** *J Sport Exerc Psychol* 2007, **29**:239-252.
  36. Crosnoe R: **Gender, Obesity, and Education.** *Sociology of Education* 2007, **80**:241-260.
  37. O'Sullivan AJ: **Does oestrogen allow women to store fat more efficiently? A biological advantage for fertility and gestation.** *Obes Rev* 2009, **10**:168-177.
  38. Flegal KM, Shepherd JA, Looker AC, Graubard BI, Borrud LG, Ogden CL, Harris TB, Everhart JE, Schenker N: **Comparisons of percentage body fat, body mass index, waist circumference, and waist-stature ratio in adults.** *Am J Clin Nutr* 2009, **89**:500-508.
  39. Gallagher D, Visser M, Sepúlveda D, Pierson RN, Harris T, Heymsfield SB: **How useful is body mass index for comparison of body fatness across age, sex, and ethnic groups?** *Am J Epidemiol* 1996, **143**:228-239.
  40. Clemmensen C, Petersen MB, Sorensen TIA: **Will the COVID-19 pandemic worsen the obesity epidemic?** *Nat Rev Endocrinol* 2020, **16**:469-470.

26  
27  
28  
29  
30  
31  
32  
33  
34  
35  
36  
37  
38  
39  
40  
41  
42  
43  
44  
45  
46  
47  
48  
49  
50  
51  
52  
53  
54  
55  
56  
57  
58  
59  
60

#### Figure legends

Figure1 Mean BMI by age (A), poverty income ratio (B), education (C) and race (D) group from 2003 to 2018.

Figure2 Mean BMI by sex (A), activity status (B)group and prevalence of overweight (C) and obesity (D) from 2003 to 2018.

B

## By poverty income ratio

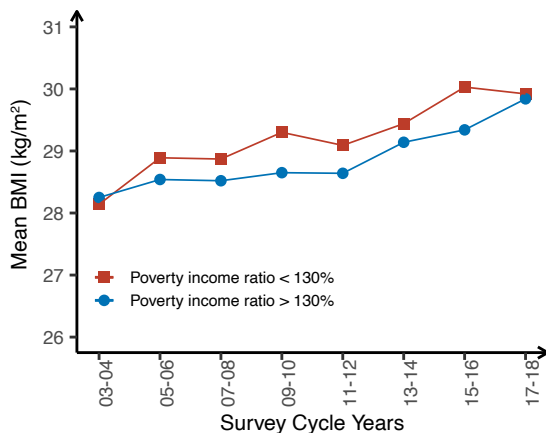

D

## By race

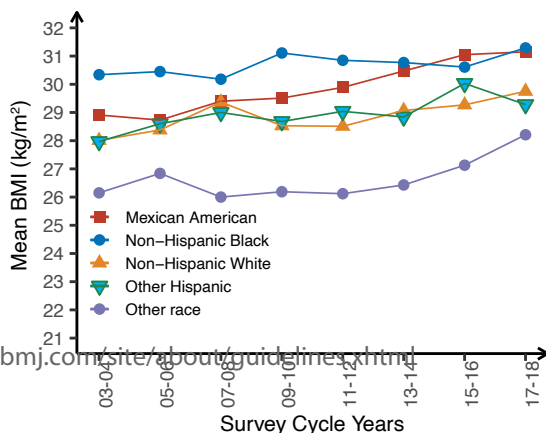

A

## By age

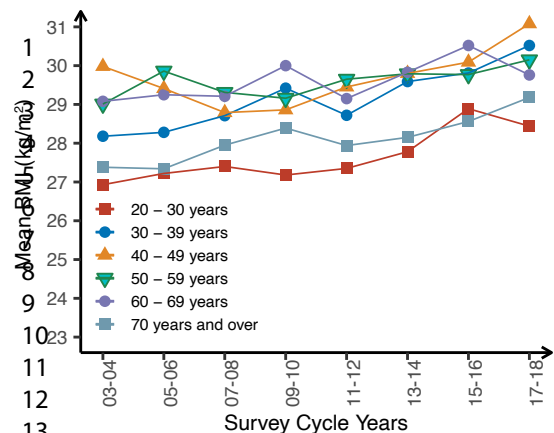

C

## By education

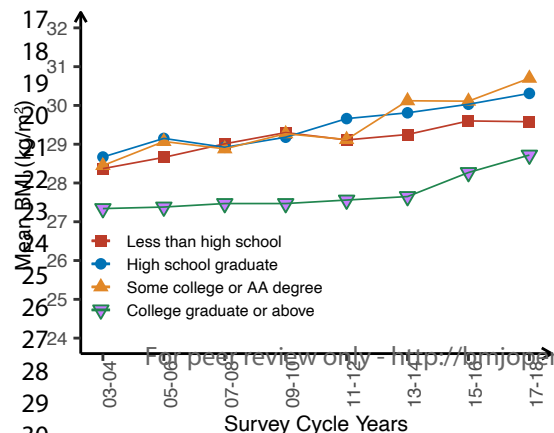

## A Mean BMI

BMJ Open

## B Mean BMI

By sex

By activity status

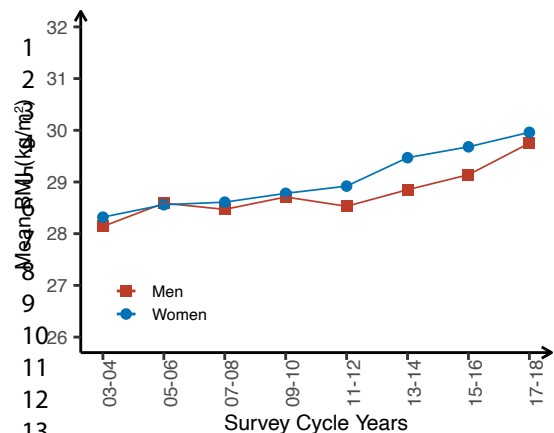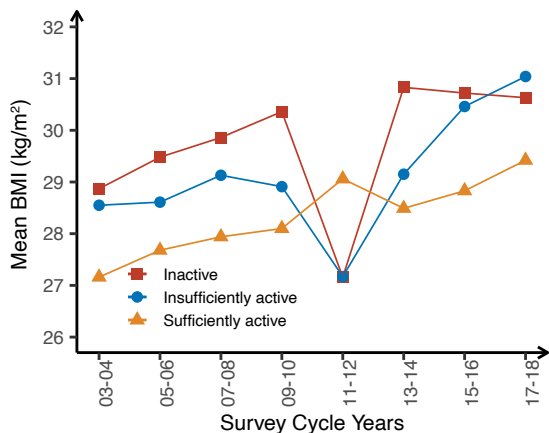

## C Overweight

## D Obesity

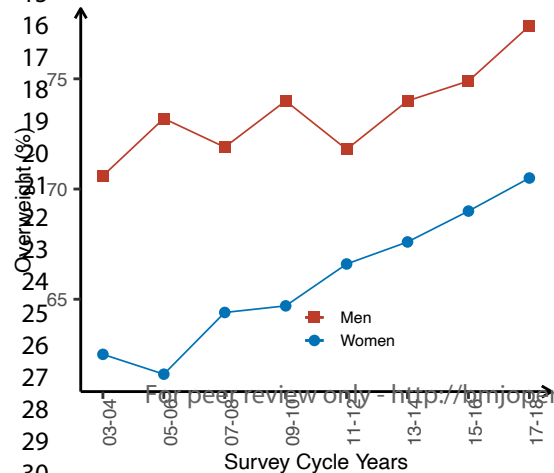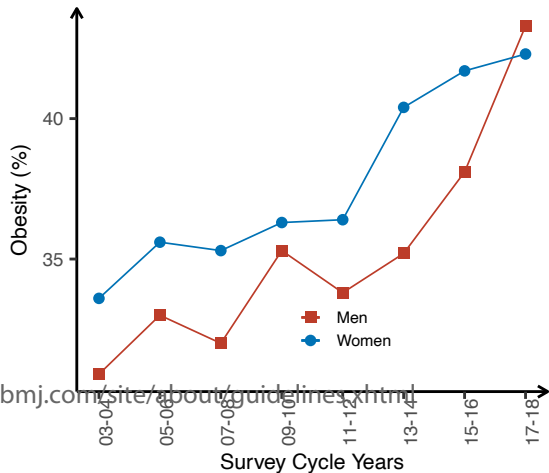

## Supplementary material

**TITLE: Trends in body mass index, overweight and obesity among adults in the United States, NHANES 2003 to 2018: a repeat cross-sectional survey**

### AUTHORS:

1. Mingxi Li<sup>1&</sup> 2. Weijun Gong<sup>1&</sup> 3. Shidong Wang<sup>2</sup> 4. Zhe Li<sup>2</sup>

### AFFILIATIONS:

1. Beijing Rehabilitation Hospital, Capital Medical University, Xixiazhuang Badachu Road, Shijingshan District, 100144, Beijing, China

2. Dongzhimen Hospital, Beijing University of Chinese Medicine, No.5 Haiyuncang, Dongcheng District, 100700, Beijing, China

&These authors contributed equally to this work and should be considered co-first authors

**CONTACT INFO:** Corresponding Author: Zhe Li; Mailing address: No.5 Haiyuncang, Dongcheng District, 100700, Beijing, China; e-mail address: lizhetcm@126.com

For the annual change in mean BMI and annual relative change in the prevalence of obesity and overweight, the calculation formulas were as follows:

- Annual change in mean BMI (kg/m<sup>2</sup>):

$$\text{annual change} = \frac{(\text{level}_{t2} - \text{level}_{t1})}{(t2 - t1)}$$

- Annual relative change in the prevalence of overweight and obesity:

$$\text{annual change} = \left( \frac{\text{level}_{t2}}{\text{level}_{t1}} \right)^{\frac{1}{t2 - t1}} - 1$$

**Table S1. Characteristics of participants according to BMI groups\***

| Characteristic              | Total<br>(n=42,266) | BMI, kg/m <sup>2</sup> † |                         |                    | p-value |
|-----------------------------|---------------------|--------------------------|-------------------------|--------------------|---------|
|                             |                     | < 25<br>(n=12,522)       | 25.0-29.9<br>(n=14,046) | ≥ 30<br>(n=1,5698) |         |
| Age, years                  | 47.11 ± 0.20        | 44.29 ± 0.30             | 48.78 ± 0.24            | 47.99 ± 0.22       | < 0.001 |
| Age, years, n (%)           |                     |                          |                         |                    | <0.001  |
| 20 - 30                     | 8,033 (20.54)       | 3,396 (29.24)            | 2,180 (16.73)           | 2,457 (16.63)      |         |
| 30 - 39                     | 7,175 (18.37)       | 2,104 (18.37)            | 2,334 (18.12)           | 2,737 (18.61)      |         |
| 40 - 49                     | 7,035 (19.43)       | 1,772 (16.64)            | 2,408 (20.50)           | 2,855 (20.84)      |         |
| 50 - 59                     | 6,714 (18.11)       | 1,675 (15.60)            | 2,224 (18.28)           | 2,815 (20.08)      |         |
| 60 - 69                     | 6,629 (12.76)       | 1,521 (9.62)             | 2,340 (13.84)           | 2,768 (14.43)      |         |
| ≥ 70                        | 6,680 (10.78)       | 2,054 (10.54)            | 2,560 (12.53)           | 2,066 (9.41)       |         |
| Sex, n (%)                  |                     |                          |                         |                    | < 0.001 |
| Male, n (%)                 | 20,408 (47.97)      | 5,784 (41.87)            | 7,773 (55.66)           | 6,851 (46.17)      |         |
| Female, n (%)               | 21,858 (52.03)      | 6,738 (58.13)            | 6,273 (44.34)           | 8,847 (53.83)      |         |
| Race, n (%)                 |                     |                          |                         |                    | < 0.001 |
| Mexican American            | 6,805 (8.38)        | 1,355 (5.61)             | 2,581 (9.35)            | 2,869 (9.86)       |         |
| Other Hispanic              | 3,755 (5.33)        | 917 (4.51)               | 1,412 (6.04)            | 1,426 (5.38)       |         |
| Non-Hispanic White          | 18,120 (67.36)      | 5,735 (69.30)            | 6,070 (67.90)           | 6,315 (65.24)      |         |
| Non-Hispanic Black          | 9,094 (11.41)       | 2,268 (9.24)             | 2,624 (9.82)            | 4,202 (14.70)      |         |
| Other Race                  | 4,492 (7.51)        | 2,247 (11.35)            | 1,359 (6.89)            | 886 (4.82)         |         |
| Education, n (%)            |                     |                          |                         |                    | < 0.001 |
| Less than high school       | 10,814 (16.4)       | 2,899 (15.19)            | 3,779 (16.79)           | 4,136 (16.95)      |         |
| High school graduate        | 9,787 (23.6)        | 2,747 (21.39)            | 3,200 (23.25)           | 3,840 (25.84)      |         |
| Some college or AA degree   | 12,266 (31.4)       | 3,409 (29.03)            | 3,860 (29.85)           | 4,997 (34.71)      |         |
| College graduate or above   | 9,345 (28.6)        | 3,441 (34.26)            | 3,194 (30.06)           | 2,710 (22.43)      |         |
| Poverty income ratio, n (%) |                     |                          |                         |                    | < 0.001 |
| < 130%                      | 12,129 (21.29)      | 3,588 (21.83)            | 3,802 (19.69)           | 4,739 (22.28)      |         |
| ≥ 130%                      | 26,450 (78.71)      | 7,863 (78.17)            | 8,944 (80.31)           | 9,643 (77.72)      |         |
| BMI, kg/m <sup>2</sup>      | 28.93 ± 0.07        | 22.20 ± 0.02             | 27.44 ± 0.02            | 35.98 ± 0.07       |         |
| Total energy intake, Kcal/d | 2,027.31 ± 7.96     | 2051.4 ± 12.7            | 2049.5 ± 12.8           | 1988.0 ± 11.1      | < 0.001 |
| Total energy intake, n (%)  |                     |                          |                         |                    | < 0.001 |
| Tertile1                    | 9,991 (25.36)       | 2,614 (24.87)            | 3,245 (23.89)           | 4,132 (27.06)      |         |
| Tertile2                    | 8,990 (27.08)       | 2,609 (26.89)            | 3,080 (28.30)           | 3,301 (26.16)      |         |
| Tertile3                    | 15,644 (47.56)      | 4,673 (48.24)            | 5,180 (47.81)           | 5,791 (46.79)      |         |
| Physical activity, n (%)    |                     |                          |                         |                    | < 0.001 |
| Inactive                    | 8,504 (18.09)       | 2,138 (14.52)            | 2,744 (16.99)           | 3,622 (22.15)      |         |
| Insufficiently active       | 6,649 (17.52)       | 1,995 (17.40)            | 2,232 (17.63)           | 2,422 (17.51)      |         |
| Sufficiently active         | 23,320 (64.39)      | 7,295 (68.09)            | 7,761 (65.38)           | 8,264 (60.34)      |         |

\* Data are presented incorporating sample weights and adjusted for clusters and strata of the complex sample design of the National Health and Nutrition Examination



1  
2  
3  
4 Survey (2003-2018).  
5

6 † Values are presented as mean  $\pm$  SE for continuous variables and unweighted  
7  
8  
9 numbers (weighted %) for categorical variables.  
10

11 Abbreviations: AA, Associate of Arts; BMI, body mass index  
12  
13  
14  
15  
16  
17  
18  
19  
20  
21  
22  
23  
24  
25  
26  
27  
28  
29  
30  
31  
32  
33  
34  
35  
36  
37  
38  
39  
40  
41  
42  
43  
44  
45  
46  
47  
48  
49  
50  
51  
52  
53  
54  
55  
56  
57  
58  
59  
60

For peer review only

Table S2. Mean BMI overtime among adults in the United States, 2003-2018 \*

| Characteristics       | BMI (weighted mean $\pm$ SE), kg/m <sup>2</sup> |                          |                               |                               |                               |                               |                               |                               |                               |
|-----------------------|-------------------------------------------------|--------------------------|-------------------------------|-------------------------------|-------------------------------|-------------------------------|-------------------------------|-------------------------------|-------------------------------|
|                       | Total<br>(n= 42,266)                            | 2003/2004<br>(n = 4,647) | 2005/2006<br>(n = 4,680)      | 2007/2008<br>(n = 5,607)      | 2009/2010<br>(n = 5,994)      | 2011/2012<br>(n = 5,237)      | 2013/2014<br>(n = 5,520)      | 2015/2016<br>(n = 5,406)      | 2017/2018<br>(n = 5,175)      |
| Overall               | 28.93 $\pm$ 0.07                                | 28.24 $\pm$ 0.15         | 28.57 $\pm$ 0.23              | 28.54 $\pm$ 0.16              | 28.75 $\pm$ 0.13              | 28.73 $\pm$ 0.21              | 29.17 $\pm$ 0.17              | 29.42 $\pm$ 0.25              | 29.86 $\pm$ 0.26              |
| Age, years            |                                                 |                          |                               |                               |                               |                               |                               |                               |                               |
| 20 - 30               | 27.54 $\pm$ 0.14                                | 26.93 $\pm$ 0.21         | 27.22 $\pm$ 0.34              | 27.40 $\pm$ 0.45              | 27.18 $\pm$ 0.30              | 27.35 $\pm$ 0.38 <sup>†</sup> | 27.78 $\pm$ 0.42 <sup>†</sup> | 28.89 $\pm$ 0.39 <sup>‡</sup> | 28.44 $\pm$ 0.55 <sup>‡</sup> |
| 30 - 39               | 29.16 $\pm$ 0.13                                | 28.18 $\pm$ 0.37         | 28.28 $\pm$ 0.36              | 28.71 $\pm$ 0.28              | 29.42 $\pm$ 0.32              | 28.72 $\pm$ 0.33              | 29.59 $\pm$ 0.35 <sup>†</sup> | 29.81 $\pm$ 0.31 <sup>‡</sup> | 30.52 $\pm$ 0.48 <sup>‡</sup> |
| 40 - 49               | 29.53 $\pm$ 0.13                                | 28.98 $\pm$ 0.28         | 29.41 $\pm$ 0.32              | 28.79 $\pm$ 0.27              | 28.86 $\pm$ 0.22              | 29.45 $\pm$ 0.35              | 29.80 $\pm$ 0.42              | 30.09 $\pm$ 0.52 <sup>†</sup> | 31.08 $\pm$ 0.36 <sup>‡</sup> |
| 50 - 59               | 29.61 $\pm$ 0.14                                | 29.01 $\pm$ 0.41         | 29.86 $\pm$ 0.43 <sup>†</sup> | 29.31 $\pm$ 0.42              | 29.16 $\pm$ 0.24              | 29.65 $\pm$ 0.51              | 29.79 $\pm$ 0.31 <sup>†</sup> | 29.77 $\pm$ 0.40              | 30.15 $\pm$ 0.32 <sup>‡</sup> |
| 60 - 69               | 29.66 $\pm$ 0.13                                | 29.08 $\pm$ 0.23         | 29.25 $\pm$ 0.29              | 29.21 $\pm$ 0.33              | 30.00 $\pm$ 0.29              | 29.15 $\pm$ 0.40              | 29.83 $\pm$ 0.32              | 30.52 $\pm$ 0.40 <sup>†</sup> | 29.76 $\pm$ 0.46              |
| $\geq$ 70             | 28.16 $\pm$ 0.10                                | 27.38 $\pm$ 0.23         | 27.34 $\pm$ 0.25              | 27.95 $\pm$ 0.25 <sup>†</sup> | 28.39 $\pm$ 0.22 <sup>‡</sup> | 27.94 $\pm$ 0.31 <sup>‡</sup> | 28.15 $\pm$ 0.24 <sup>‡</sup> | 28.56 $\pm$ 0.35 <sup>‡</sup> | 29.18 $\pm$ 0.26 <sup>‡</sup> |
| Sex                   |                                                 |                          |                               |                               |                               |                               |                               |                               |                               |
| Male                  | 28.79 $\pm$ 0.08                                | 28.14 $\pm$ 0.13         | 28.59 $\pm$ 0.25              | 28.47 $\pm$ 0.16              | 28.71 $\pm$ 0.21              | 28.53 $\pm$ 0.23              | 28.85 $\pm$ 0.15              | 29.14 $\pm$ 0.26 <sup>‡</sup> | 29.75 $\pm$ 0.27 <sup>‡</sup> |
| Female                | 29.07 $\pm$ 0.09                                | 28.32 $\pm$ 0.24         | 28.56 $\pm$ 0.28              | 28.61 $\pm$ 0.20              | 28.78 $\pm$ 0.14 <sup>†</sup> | 28.92 $\pm$ 0.23 <sup>‡</sup> | 29.47 $\pm$ 0.26 <sup>‡</sup> | 29.68 $\pm$ 0.29 <sup>‡</sup> | 29.96 $\pm$ 0.37 <sup>‡</sup> |
| Race                  |                                                 |                          |                               |                               |                               |                               |                               |                               |                               |
| Mexican American      | 29.96 $\pm$ 0.13                                | 28.91 $\pm$ 0.39         | 28.73 $\pm$ 0.22              | 29.40 $\pm$ 0.31              | 29.51 $\pm$ 0.27              | 29.89 $\pm$ 0.38              | 30.47 $\pm$ 0.24 <sup>‡</sup> | 31.05 $\pm$ 0.33 <sup>‡</sup> | 31.15 $\pm$ 0.35 <sup>‡</sup> |
| Other Hispanic        | 29.05 $\pm$ 0.15                                | 27.97 $\pm$ 0.64         | 28.60 $\pm$ 0.51              | 29.00 $\pm$ 0.41              | 28.68 $\pm$ 0.41              | 29.04 $\pm$ 0.31 <sup>‡</sup> | 28.84 $\pm$ 0.50              | 30.03 $\pm$ 0.40 <sup>‡</sup> | 29.28 $\pm$ 0.33 <sup>‡</sup> |
| Non-Hispanic White    | 28.73 $\pm$ 0.09                                | 28.01 $\pm$ 0.18         | 28.38 $\pm$ 0.25              | 28.37 $\pm$ 0.26              | 28.53 $\pm$ 0.16 <sup>‡</sup> | 28.51 $\pm$ 0.28 <sup>‡</sup> | 29.07 $\pm$ 0.19 <sup>‡</sup> | 29.27 $\pm$ 0.26 <sup>‡</sup> | 29.75 $\pm$ 0.35 <sup>‡</sup> |
| Non-Hispanic Black    | 30.72 $\pm$ 0.11                                | 30.34 $\pm$ 0.31         | 30.45 $\pm$ 0.28              | 30.18 $\pm$ 0.30              | 31.11 $\pm$ 0.35              | 30.85 $\pm$ 0.28              | 30.77 $\pm$ 0.31              | 30.61 $\pm$ 0.34              | 31.29 $\pm$ 0.29 <sup>†</sup> |
| Other race            | 26.77 $\pm$ 0.16                                | 26.15 $\pm$ 0.52         | 26.84 $\pm$ 0.65              | 26.00 $\pm$ 0.55              | 26.19 $\pm$ 0.39              | 26.12 $\pm$ 0.41              | 26.43 $\pm$ 0.36              | 27.13 $\pm$ 0.42              | 28.21 $\pm$ 0.39 <sup>‡</sup> |
| Education             |                                                 |                          |                               |                               |                               |                               |                               |                               |                               |
| Less than high school | 29.09 $\pm$ 0.09                                | 28.37 $\pm$ 0.32         | 28.66 $\pm$ 0.16              | 29.01 $\pm$ 0.25              | 29.30 $\pm$ 0.22 <sup>‡</sup> | 29.11 $\pm$ 0.28 <sup>‡</sup> | 29.25 $\pm$ 0.21 <sup>‡</sup> | 29.60 $\pm$ 0.29 <sup>‡</sup> | 29.58 $\pm$ 0.37 <sup>‡</sup> |
| High school graduate  | 29.47 $\pm$ 0.10                                | 28.67 $\pm$ 0.20         | 29.15 $\pm$ 0.27              | 28.92 $\pm$ 0.29              | 29.18 $\pm$ 0.20 <sup>†</sup> | 29.66 $\pm$ 0.37 <sup>†</sup> | 29.81 $\pm$ 0.33 <sup>‡</sup> | 30.03 $\pm$ 0.38 <sup>‡</sup> | 30.31 $\pm$ 0.18 <sup>‡</sup> |

1  
2  
3  
4  
5  
6  
7  
8  
9  
10  
11  
12  
13  
14  
15  
16  
17  
18  
19  
20  
21  
22  
23  
24  
25  
26  
27  
28  
29  
30  
31  
32  
33  
34  
35  
36  
37  
38  
39  
40  
41  
42  
43  
44  
45  
46

|                           |              |              |                           |                           |                           |                           |                           |                           |                           |  |
|---------------------------|--------------|--------------|---------------------------|---------------------------|---------------------------|---------------------------|---------------------------|---------------------------|---------------------------|--|
| Some college or AA degree | 29.51 ± 0.10 | 28.45 ± 0.22 | 29.07 ± 0.29              | 28.88 ± 0.25              | 29.27 ± 0.17 <sup>†</sup> | 29.12 ± 0.28 <sup>†</sup> | 30.12 ± 0.27 <sup>‡</sup> | 30.11 ± 0.33 <sup>‡</sup> | 30.70 ± 0.32 <sup>‡</sup> |  |
| College graduate or above | 27.78 ± 0.11 | 27.34 ± 0.33 | 27.38 ± 0.37              | 27.40 ± 0.28              | 27.47 ± 0.30              | 27.56 ± 0.34 <sup>†</sup> | 27.65 ± 0.20 <sup>†</sup> | 28.27 ± 0.26 <sup>‡</sup> | 28.72 ± 0.43 <sup>‡</sup> |  |
| Poverty income ratio      |              |              |                           |                           |                           |                           |                           |                           |                           |  |
| < 130%                    | 28.14 ± 0.22 | 28.14 ± 0.22 | 28.89 ± 0.31 <sup>†</sup> | 28.87 ± 0.28 <sup>†</sup> | 29.30 ± 0.34 <sup>‡</sup> | 29.09 ± 0.21 <sup>‡</sup> | 29.44 ± 0.21 <sup>‡</sup> | 30.03 ± 0.32 <sup>‡</sup> | 29.92 ± 0.39 <sup>‡</sup> |  |
| ≥ 130%                    | 28.25 ± 0.15 | 28.25 ± 0.15 | 28.54 ± 0.24              | 28.52 ± 0.16              | 28.65 ± 0.15 <sup>†</sup> | 28.64 ± 0.26 <sup>‡</sup> | 29.14 ± 0.23 <sup>‡</sup> | 29.34 ± 0.27 <sup>‡</sup> | 28.24 ± 0.15 <sup>‡</sup> |  |
| Physical activity         |              |              |                           |                           |                           |                           |                           |                           |                           |  |
| Inactive                  | 28.53 ± 0.09 | 28.87 ± 0.72 | 29.48 ± 0.82              | 29.86 ± 0.21              | 30.36 ± 0.21              | 27.16 ± 0.35 <sup>†</sup> | 30.83 ± 0.30 <sup>†</sup> | 30.72 ± 0.33 <sup>†</sup> | 30.63 ± 0.39 <sup>†</sup> |  |
| Insufficiently active     | 28.98 ± 0.12 | 28.55 ± 0.20 | 28.61 ± 0.28              | 29.13 ± 0.34              | 28.91 ± 0.21              | 27.17 ± 0.38 <sup>‡</sup> | 29.15 ± 0.32              | 30.46 ± 0.58 <sup>‡</sup> | 31.04 ± 0.42 <sup>‡</sup> |  |
| Sufficiently active       | 28.53 ± 0.09 | 27.16 ± 0.23 | 27.68 ± 0.27              | 27.94 ± 0.20 <sup>†</sup> | 28.10 ± 0.18 <sup>‡</sup> | 29.06 ± 0.22 <sup>‡</sup> | 28.49 ± 0.17 <sup>‡</sup> | 28.83 ± 0.25 <sup>‡</sup> | 29.42 ± 0.29 <sup>‡</sup> |  |
| Total energy intake       |              |              |                           |                           |                           |                           |                           |                           |                           |  |
| Tetile 1                  | 29.30 ± 0.11 | 28.51 ± 0.19 | 29.21 ± 0.30              | 28.66 ± 0.24              | 29.37 ± 0.25 <sup>‡</sup> | 29.04 ± 0.31 <sup>†</sup> | 29.58 ± 0.34 <sup>‡</sup> | 29.83 ± 0.33 <sup>‡</sup> | 29.91 ± 0.35 <sup>‡</sup> |  |
| Tetile 2                  | 28.95 ± 0.11 | 27.94 ± 0.22 | 28.78 ± 0.26 <sup>‡</sup> | 28.49 ± 0.27 <sup>‡</sup> | 28.81 ± 0.23 <sup>‡</sup> | 28.92 ± 0.23 <sup>‡</sup> | 29.25 ± 0.34 <sup>‡</sup> | 29.31 ± 0.34 <sup>‡</sup> | 29.98 ± 0.45 <sup>‡</sup> |  |
| Tetile 3                  | 28.97 ± 0.10 | 28.53 ± 0.29 | 28.37 ± 0.36              | 28.72 ± 0.19              | 28.52 ± 0.24              | 28.84 ± 0.34 <sup>†</sup> | 29.14 ± 0.22 <sup>†</sup> | 29.65 ± 0.23 <sup>‡</sup> | 29.96 ± 0.27 <sup>‡</sup> |  |

\* Data are presented incorporating sample weights and adjusted for clusters and strata of the complex sample design of the National Health and Nutrition Examination Survey (2003–2018). († p < 0.05; ‡ p < 0.01)

Abbreviations: AA, Associate of Arts; BMI, body mass index; CI, confidence interval.

**Table S3. Prevalence of obesity overtime among adults in the United States, 2003-2018 \***

| Characteristics       | Prevalence (95CI),%  |                          |                          |                          |                          |                          |                          |                          |                          |
|-----------------------|----------------------|--------------------------|--------------------------|--------------------------|--------------------------|--------------------------|--------------------------|--------------------------|--------------------------|
|                       | Total<br>(n= 42,266) | 2003/2004<br>(n = 4,647) | 2005/2006<br>(n = 4,680) | 2007/2008<br>(n = 5,607) | 2009/2010<br>(n = 5,994) | 2011/2012<br>(n = 5,237) | 2013/2014<br>(n = 5,520) | 2015/2016<br>(n = 5,406) | 2017/2018<br>(n = 5,175) |
| Overall               | 36.7 (35.7, 37.6)    | 32.3 (29.9, 34.6)        | 34.4 (31.6, 37.2)        | 33.7 (31.5, 35.9)        | 35.8 (34.0, 37.7)        | 35.2 (32.4, 37.9)        | 37.9 (36.2, 39.6)        | 40.0 (37.0, 43.0)        | 42.8 (39.5, 46.1)        |
| Age, years            |                      |                          |                          |                          |                          |                          |                          |                          |                          |
| < 30                  | 29.6 (27.9, 31.4)    | 26.1 (23.1, 29.0)        | 27.7 (22.7, 32.6)        | 27.4 (21.6, 33.2)        | 27.7 (24.0, 31.4)        | 29.0 (23.9, 34.1)        | 29.5 (25.8, 33.1)        | 31.7 (26.7, 36.7) ‡      | 37.5 (30.2, 44.8) ‡      |
| 30 - 39               | 37.1 (35.5, 38.7)    | 32.5 (27.6, 37.5)        | 31.1 (26.6, 35.6)        | 35.5 (30.5, 39.7)        | 39.7 (35.4, 44.1) †      | 33.5 (30.2, 36.9)        | 39.9 (35.9, 43.9) †      | 40.5 (37.0, 44.1) †      | 44.3 (38.8, 49.9) ‡      |
| 40 - 49               | 39.3 (37.7, 40.9)    | 36.7 (34.2, 39.2)        | 39.0 (34.4, 43.6)        | 33.7 (29.4, 38.1)        | 36.2 (33.0, 39.5)        | 38.8 (33.4, 44.2)        | 41.1 (35.7, 46.5)        | 44.0 (38.1, 49.8) †      | 46.3 (41.7, 51.0) ‡      |
| 50 - 59               | 40.5 (38.6, 42.4)    | 35.9 (29.6, 42.1)        | 43.2 (38.6, 47.7)        | 38.1 (32.5, 43.6)        | 37.2 (33.8, 40.5)        | 39.5 (33.2, 45.9)        | 41.7 (37.1, 46.3)        | 42.7 (35.8, 49.6)        | 44.9 (40.7, 49.1) ‡      |
| 60 - 69               | 41.6 (39.6, 43.6)    | 35.7 (32.1, 39.3)        | 38.7 (34.1, 43.3)        | 38.6 (34.4, 42.8)        | 43.8 (39.7, 48.0) ‡      | 39.5 (34.5, 44.6) ‡      | 42.9 (38.9, 46.9) †      | 46.0 (40.3, 51.6) ‡      | 43.3 (35.3, 51.4) †      |
| ≥ 70                  | 32.2 (30.7, 33.6)    | 26.2 (22.4, 30.0)        | 25.8 (21.4, 30.2)        | 30.9 (27.0, 34.8) †      | 33.4 (30.0, 36.8) ‡      | 29.5 (26.4, 32.7) ‡      | 32.7 (28.4, 37.0) ‡      | 35.5 (30.9, 40.1) ‡      | 40.3 (36.0, 44.6) ‡      |
| Sex                   |                      |                          |                          |                          |                          |                          |                          |                          |                          |
| Men                   | 35.3 (34.1, 36.6)    | 30.9 (28.4, 33.4)        | 33.0 (28.9, 37.1)        | 32.0 (29.1, 34.8)        | 35.3 (31.9, 38.7) †      | 33.8 (31.2, 36.4)        | 35.2 (33.2, 37.2) ‡      | 38.1 (33.9, 42.3) ‡      | 43.3 (38.2, 48.4) ‡      |
| Women                 | 37.9 (36.8, 38.9)    | 33.6 (30.3, 36.8)        | 35.6 (33.0, 38.3)        | 35.3 (33.0, 37.6)        | 36.3 (34.5, 38.1) †      | 36.4 (33.0, 39.8) ‡      | 40.4, 37.9, 43.0) ‡      | 41.7 (38.7, 44.7) ‡      | 42.3 (38.6, 46.0) ‡      |
| Race                  |                      |                          |                          |                          |                          |                          |                          |                          |                          |
| Mexican American      | 43.1 (41.5, 44.8)    | 36.3 (31.2, 41.4)        | 33.3 (31.6, 35.1)        | 39.2 (32.2, 46.2)        | 38.9 (36.4, 43.4)        | 45.2 (40.7, 49.7) ‡      | 46.7 (42.5, 51.0) ‡      | 49.0 (45.6, 52.4) ‡      | 51.6 (47.5, 55.8) ‡      |
| Other Hispanic        | 37.0 (35.0, 39.1)    | 29.5 (19.2, 39.8)        | 34.2 (26.6, 41.9)        | 34.9 (30.3, 39.6)        | 34.7 (28.8, 40.6)        | 38.1 (32.7, 43.6) ‡      | 36.9 (31.2, 42.6) †      | 44.2 (38.4, 49.9) ‡      | 37.0 (42.7, 41.2) ‡      |
| Non-Hispanic White    | 35.5 (34.4, 36.6)    | 31.0 (28.5, 33.4)        | 33.3 (30.2, 36.5)        | 32.6 (29.2, 36.0)        | 34.7 (32.4, 37.1) ‡      | 33.4 (29.9, 37.0) ‡      | 37.0 (35.0, 39.1) ‡      | 38.9 (35.7, 42.1) ‡      | 43.0 (38.2, 47.7) ‡      |
| Non-Hispanic Black    | 47.1 (45.7, 48.5)    | 45.2 (40.9, 49.4)        | 45.4 (42.0, 48.8)        | 43.6 (39.6, 47.5)        | 49.9 (45.1, 54.7)        | 47.8 (44.3, 51.2)        | 47.9 (43.8, 52.1)        | 46.8 (42.5, 51.1)        | 49.8 (46.9, 52.7)        |
| Other race            | 23.7 (21.4, 25.9)    | 19.0 (9.9, 28.0)         | 26.4 (17.6, 35.2)        | 19.4 (9.9, 29.0)         | 19.7 (15.4, 24.0)        | 18.8 (13.9, 23.8)        | 21.4 (16.7, 26.0)        | 28.0 (21.3, 36.7)        | 30.6 (25.5, 35.7) †      |
| Education             |                      |                          |                          |                          |                          |                          |                          |                          |                          |
| Less than high school | 37.9 (36.7, 39.2)    | 34.3 (30.0, 38.5)        | 35.7 (33.3, 38.1)        | 37.6 (33.1, 42.0)        | 37.6 (34.9, 40.3) †      | 37.7 (35.1, 40.4) †      | 40.6 (37.5, 43.6)        | 40.3 (36.3, 43.7) ‡      | 41.4 (37.3, 45.6) †      |
| High school graduate  | 40.0 (38.5, 41.4)    | 34.3 (30.5, 38.1)        | 38.9 (35.1, 42.6)        | 35.0 (31.6, 38.4)        | 38.3 (34.6, 42.0)        | 40.3 (35.3, 45.5) †      | 41.3 (37.0, 45.7) ‡      | 43.7 (38.6, 48.9) ‡      | 47.2 (43.2, 51.2) ‡      |

1  
2  
3  
4  
5  
6  
7  
8  
9  
10  
11  
12  
13  
14  
15  
16  
17  
18  
19  
20  
21  
22  
23  
24  
25  
26  
27  
28  
29  
30  
31  
32  
33  
34  
35  
36  
37  
38  
39  
40  
41  
42  
43  
44  
45  
46

|                           |                   |                   |                    |                    |                    |                    |                    |                    |                    |
|---------------------------|-------------------|-------------------|--------------------|--------------------|--------------------|--------------------|--------------------|--------------------|--------------------|
| Some college or AA degree | 40.7 (39.4, 41.9) | 33.9 (30.4, 37.4) | 36.8 (32.9, 40.7)  | 37.5 (34.4, 40.6)  | 40.6 (38.3, 42.9)‡ | 38.0 (34.0, 41.9)† | 42.9 (40.1, 45.7)‡ | 46.0 (42.2, 49.8)‡ | 47.7 (43.8, 51.5)‡ |
| College graduate or above | 28.8 (27.2, 30.4) | 26.3 (22.0, 30.7) | 26.2 (21.9, 30.5)  | 24.9 (20.9, 28.9)  | 27.5 (23.7, 31.4)  | 27.6 (22.5, 32.8)  | 28.7 (26.2, 31.3)† | 31.5 (27.5, 35.4)‡ | 34.7 (29.1, 40.2)‡ |
| Poverty income ratio      |                   |                   |                    |                    |                    |                    |                    |                    |                    |
| < 130%                    | 38.4 (37.2, 39.6) | 32.3 (29.7, 34.6) | 36.3 (33.1, 39.6)‡ | 35.9 (32.1, 39.7)† | 38.4 (34.8, 41.9)‡ | 38.0 (35.5, 40.6)‡ | 39.4 (36.9, 41.8)‡ | 42.0 (38.1, 45.9)‡ | 43.8 (39.7, 47.9)‡ |
| ≥ 130%                    | 36.4 (35.3, 37.4) | 32.3 (29.6, 34.9) | 34.3 (31.0, 37.6)  | 33.1 (30.9, 35.4)  | 35.7 (33.4, 37.9)† | 34.3 (31.0, 37.6)† | 37.6 (35.3, 40.0)‡ | 39.8 (36.3, 43.2)‡ | 43.1 (39.6, 46.7)‡ |
| Physical activity         |                   |                   |                    |                    |                    |                    |                    |                    |                    |
| Inactive                  | 44.8 (43.4, 46.2) | 38.0 (30.4, 45.6) | 41.7 (29.5, 53.9)  | 42.6 (39.7, 45.4)  | 44.4 (42.4, 46.4)  | 26.2 (20.0, 32.3)† | 48.5 (44.9, 52.1)† | 48.0 (44.5, 51.5)† | 46.7 (43.1, 50.4)† |
| Insufficiently active     | 36.4 (34.8, 38.0) | 33.7 (30.6, 36.7) | 34.0 (30.8, 37.3)  | 36.3 (31.1, 41.4)  | 37.3 (33.0, 41.6)  | 27.4 (22.0, 32.8)† | 36.9 (33.6, 40.1)  | 44.5 (37.2, 51.8)‡ | 48.3 (41.7, 54.9)‡ |
| Sufficiently active       | 34.3 (33.2, 35.4) | 24.8 (21.5, 28.2) | 29.1 (24.9, 33.4)  | 30.0 (27.5, 32.5)† | 32.3 (29.7, 34.9)‡ | 36.9 (34.2, 39.5)‡ | 33.7 (31.9, 35.5)‡ | 36.6 (33.4, 39.7)‡ | 40.6 (36.7, 44.6)‡ |
| Total energy intake       |                   |                   |                    |                    |                    |                    |                    |                    |                    |
| Tetile 1                  | 39.9 (38.4, 41.3) | 34.5 (32.2, 36.8) | 38.2 (34.8, 41.7)  | 36.1 (33.1, 39.0)  | 39.3 (36.1, 42.5)‡ | 38.5 (33.6, 43.4)  | 40.8 (36.2, 45.3)‡ | 43.4 (39.2, 47.6)‡ | 46.1 (41.4, 50.8)‡ |
| Tetile 2                  | 36.0 (34.5, 37.6) | 30.1 (26.7, 33.4) | 35.8 (31.7, 39.8)† | 32.1 (28.5, 35.7)  | 36.1 (32.8, 39.4)† | 34.7 (31.4, 38.1)‡ | 38.0 (33.4, 42.7)‡ | 37.9 (33.2, 42.7)‡ | 43.3 (37.1, 49.4)‡ |
| Tetile 3                  | 36.7 (35.5, 38.0) | 33.9 (29.9, 37.8) | 32.6 (28.4, 36.9)  | 34.8 (32.0, 37.6)  | 35.0 (31.6, 38.4)  | 35.4 (31.6, 39.3)† | 37.5 (34.8, 40.2)† | 41.3 (37.6, 45.1)‡ | 43.3 (39.4, 47.2)‡ |

\* Data are presented incorporating sample weights and adjusted for clusters and strata of the complex sample design of the National Health and Nutrition Examination Survey (2003–2018). († p < 0.05; ‡ p < 0.01)

Abbreviations: AA, Associate of Arts; BMI, body mass index; CI, confidence interval.

Table S4. Prevalence of overweight overtime among adults in the United States, 2003-2018 \*

| Characteristics       | Prevalence (95CI),%  |                          |                          |                          |                                |                                |                                |                                |                                |
|-----------------------|----------------------|--------------------------|--------------------------|--------------------------|--------------------------------|--------------------------------|--------------------------------|--------------------------------|--------------------------------|
|                       | Total<br>(n= 42,266) | 2003/2004<br>(n = 4,647) | 2005/2006<br>(n = 4,680) | 2007/2008<br>(n = 5,607) | 2009/2010<br>(n = 5,994)       | 2011/2012<br>(n = 5,237)       | 2013/2014<br>(n = 5,520)       | 2015/2016<br>(n = 5,406)       | 2017/2018<br>(n = 5,175)       |
| Overall               | 69.6 (68.7, 70.5)    | 66.3 (64.4, 68.3)        | 67.2 (64.6, 69.8)        | 68.0 (66.2, 69.8)        | 69.2 (66.6, 71.7)              | 69.1 (65.9, 72.3)              | 70.7 (69.0, 72.3)              | 71.8 (68.9, 74.8)              | 73.8 (71.1, 76.4)              |
| Age, years            |                      |                          |                          |                          |                                |                                |                                |                                |                                |
| 20 - 30               | 56.6 (54.7, 58.5)    | 53.4 (49.1, 57.6)        | 56.4 (51.9, 60.8)        | 55.2 (51.1, 59.3)        | 56.7 (50.7, 62.7)              | 54.9 (47.4, 62.3)              | 56.6 (52.4, 60.9)              | 59.7 (55.3, 64.1) <sup>†</sup> | 59.4 (53.2, 65.5) <sup>†</sup> |
| 30 - 39               | 69.8 (68.1, 71.4)    | 63.0 (57.7, 68.4)        | 64.6 (59.1, 70.0)        | 69.3 (65.9, 72.8)        | 70.7 (67.0, 74.5) <sup>†</sup> | 68.6 (64.4, 72.7)              | 72.3 (68.2, 76.3) <sup>‡</sup> | 73.2 (69.5, 76.8) <sup>‡</sup> | 76.2 (70.6, 81.8) <sup>‡</sup> |
| 40 - 49               | 74.0 (72.4, 75.5)    | 73.9 (69.2, 78.6)        | 70.2 (66.2, 74.2)        | 71.4 (67.6, 75.3)        | 69.6 (66.4, 72.9)              | 75.9 (71.7, 80.1)              | 76.6 (73.0, 80.2)              | 73.9 (68.7, 79.0)              | 80.9 (75.5, 86.3)              |
| 50 - 59               | 74.0 (72.4, 75.6)    | 71.1 (66.7, 75.5)        | 75.5 (91.0, 79.9)        | 71.9 (66.7, 77.1)        | 74.3 (70.0, 78.5)              | 75.2 (70.6, 79.8)              | 74.6 (72.2, 77.0)              | 74.1 (69.6, 78.7)              | 74.8 (69.3, 80.4)              |
| 60 - 69               | 77.1 (75.4, 78.8)    | 76.7 (73.4, 80.1)        | 76.7 (71.7, 81.6)        | 75.5 (71.4, 79.6)        | 78.6 (74.7, 82.5)              | 74.4 (68.3, 80.6)              | 76.0 (72.5, 79.5)              | 80.1 (74.5, 85.7)              | 78.1 (73.6, 82.5)              |
| ≥ 70                  | 70.2 (68.9, 71.4)    | 65.6 (61.0, 70.2)        | 63.9 (60.4, 67.4)        | 69.1 (65.8, 72.4)        | 71.0 (68.2, 73.8) <sup>†</sup> | 67.4 (63.8, 70.9) <sup>†</sup> | 70.8 (68.2, 73.4) <sup>†</sup> | 73.8 (70.2, 77.4) <sup>‡</sup> | 77.1 (73.5, 80.7) <sup>‡</sup> |
| Sex                   |                      |                          |                          |                          |                                |                                |                                |                                |                                |
| Male                  | 73.5 (72.5, 75.6)    | 70.6 (68.0, 73.0)        | 73.2 (70.3, 76.2)        | 71.9 (70.1, 73.7)        | 74.0 (70.4, 77.6)              | 71.8 (68.6, 75.0)              | 74.0 (71.9, 76.1) <sup>†</sup> | 74.9 (72.0, 77.8) <sup>†</sup> | 77.4 (73.9, 80.9) <sup>‡</sup> |
| Female                | 66.0 (64.9, 67.1)    | 62.5 (59.9, 65.9)        | 61.6 (58.3, 64.8)        | 64.4 (61.7, 67.1)        | 64.7 (62.3, 67.1)              | 66.6 (63.0, 70.2) <sup>‡</sup> | 67.6 (65.2, 70.0) <sup>‡</sup> | 69.0 (65.4, 72.6) <sup>‡</sup> | 70.5 (67.3, 73.6) <sup>‡</sup> |
| Race                  |                      |                          |                          |                          |                                |                                |                                |                                |                                |
| Mexican American      | 79.7 (78.1, 81.2)    | 73.8 (67.8, 79.8)        | 73.4 (69.8, 77.0)        | 77.3 (73.3, 81.2)        | 79.9 (76.5, 83.3)              | 78.6 (72.7, 84.5)              | 83.2 (80.1, 86.3) <sup>†</sup> | 82.8 (78.9, 86.8) <sup>‡</sup> | 85.3 (80.8, 89.9) <sup>‡</sup> |
| Other Hispanic        | 74.6 (72.9, 76.3)    | 68.4 (58.1, 78.7)        | 70.5 (62.3, 78.8)        | 74.8 (69.5, 80.1)        | 72.2 (69.4, 75.1)              | 75.2 (71.8, 78.7)              | 70.0 (64.7, 75.2)              | 78.5 (74.8, 82.2)              | 80.0 (76.0, 84.1) <sup>†</sup> |
| Non-Hispanic White    | 68.7 (67.7, 69.8)    | 65.2 (62.3, 68.0)        | 66.1 (62.8, 69.4)        | 67.2 (64.6, 69.9)        | 68.1 (65.0, 71.2)              | 68.7 (64.9, 72.5) <sup>†</sup> | 70.6 (69.0, 72.2) <sup>†</sup> | 71.5 (68.6, 74.3) <sup>†</sup> | 72.2 (68.6, 75.8) <sup>‡</sup> |
| Non-Hispanic Black    | 75.5 (74.4, 76.6)    | 75.8 (72.8, 78.7)        | 75.5 (72.0, 79.1)        | 73.0 (70.6, 75.4)        | 76.4 (73.3, 79.5)              | 76.2 (73.0, 79.4)              | 75.5 (72.2, 78.7)              | 75.0 (71.8, 78.1)              | 76.4 (73.6, 79.1)              |
| Other race            | 54.1 (51.9, 56.3)    | 50.4 (42.2, 58.6)        | 51.0 (40.9, 61.0)        | 49.2 (41.9, 56.5)        | 53.0 (45.8, 60.1)              | 47.3 (43.5, 51.1)              | 50.1 (44.3, 56.0)              | 55.8 (50.6, 61.0)              | 66.5 (63.1, 70.0) <sup>‡</sup> |
| Education             |                      |                          |                          |                          |                                |                                |                                |                                |                                |
| Less than high school | 71.8 (70.4, 73.2)    | 66.9 (61.8, 72.0)        | 67.8 (64.6, 71.0)        | 71.3 (68.5, 74.1)        | 75.0 (70.9, 79.1) <sup>‡</sup> | 71.7 (67.7, 75.7)              | 73.7 (70.9, 76.4) <sup>†</sup> | 73.8 (69.1, 78.6) <sup>†</sup> | 74.7 (71.4, 78.0) <sup>‡</sup> |

1  
2  
3  
4  
5  
6  
7  
8  
9  
10  
11  
12  
13  
14  
15  
16  
17  
18  
19  
20  
21  
22  
23  
24  
25  
26  
27  
28  
29  
30  
31  
32  
33  
34  
35  
36  
37  
38  
39  
40  
41  
42  
43  
44  
45  
46

|                           |                   |                   |                                |                                |                                |                                |                                |                                |                                |  |
|---------------------------|-------------------|-------------------|--------------------------------|--------------------------------|--------------------------------|--------------------------------|--------------------------------|--------------------------------|--------------------------------|--|
| High school graduate      | 72.4 (71.2, 73.6) | 69.5 (67.4, 71.6) | 70.0 (66.3, 73.7)              | 69.9 (66.8, 72.9)              | 71.3 (68.3, 74.4)              | 73.1 (68.1, 78.1)              | 73.6 (70.5, 76.8) <sup>†</sup> | 77.3 (73.4, 81.2) <sup>‡</sup> | 74.7 (71.6, 77.8) <sup>‡</sup> |  |
| Some college or AA degree | 71.9 (70.7, 73.1) | 68.1 (64.8, 71.3) | 70.1 (66.8, 73.4)              | 69.0 (66.2, 71.8)              | 70.2 (66.6, 73.8)              | 70.5 (65.8, 75.2)              | 74.4 (72.4, 76.5) <sup>‡</sup> | 74.7 (71.8, 77.6) <sup>‡</sup> | 76.9 (73.6, 80.1) <sup>‡</sup> |  |
| College graduate or above | 63.6 (62.0, 65.2) | 60.0 (55.0, 65.0) | 60.4 (55.2, 65.7)              | 62.3 (58.1, 66.5) <sup>‡</sup> | 62.6 (57.3, 68.0)              | 63.8 (58.6, 69.0) <sup>‡</sup> | 63.0 (59.7, 66.2) <sup>‡</sup> | 64.5 (60.2, 68.9) <sup>‡</sup> | 69.5 (65.0, 74.0) <sup>‡</sup> |  |
| Poverty income ratio      |                   |                   |                                |                                |                                |                                |                                |                                |                                |  |
| 130%                      | 68.8 (67.4, 70.3) | 62.6 (59.1, 66.1) | 67.3 (63.1, 71.6) <sup>‡</sup> | 67.1 (63.9, 70.4) <sup>†</sup> | 71.1 (66.3, 75.8) <sup>‡</sup> | 68.4 (64.2, 72.7) <sup>‡</sup> | 69.1 (65.9, 72.4) <sup>‡</sup> | 72.6 (68.1, 77.2) <sup>‡</sup> | 71.0 (67.1, 74.9) <sup>‡</sup> |  |
| > 130%                    | 69.9 (68.9, 70.9) | 67.3 (64.8, 69.8) | 67.2 (64.1, 70.4)              | 68.3 (66.5, 70.2)              | 68.8 (65.9, 71.6)              | 69.3 (65.6, 73.0)              | 71.3 (69.1, 73.6) <sup>†</sup> | 71.6 (68.2, 75.0) <sup>†</sup> | 74.9 (72.3, 77.4) <sup>‡</sup> |  |
| Physical activity         |                   |                   |                                |                                |                                |                                |                                |                                |                                |  |
| Inactive                  | 75.6 (74.3, 76.9) | 67.8 (59.4, 76.0) | 74.2 (66.0, 82.6)              | 71.7 (69.5, 74.0)              | 76.3 (73.4, 79.2)              | 63.2 (56.5, 69.9)              | 78.4 (75.4, 81.5) <sup>†</sup> | 77.6 (73.8, 81.4) <sup>†</sup> | 78.3 (75.4, 81.2) <sup>†</sup> |  |
| Insufficiently active     | 69.7 (68.1, 71.3) | 68.3 (66.1, 70.5) | 68.2 (63.6, 72.7)              | 69.4 (65.9, 73.0)              | 68.1 (64.1, 72.1)              | 59.6 (53.1, 66.1) <sup>†</sup> | 71.0 (66.0, 76.0)              | 76.0 (70.1, 81.8) <sup>†</sup> | 81.1 (77.8, 84.4) <sup>‡</sup> |  |
| Sufficiently active       | 67.9 (66.7, 69.1) | 60.9 (56.1, 65.7) | 62.0 (58.2, 65.7)              | 66.4 (63.9, 68.8)              | 66.7 (62.9, 70.4)              | 70.8 (67.6, 74.0) <sup>‡</sup> | 67.4 (65.4, 69.4) <sup>†</sup> | 69.3 (66.3, 72.2) <sup>‡</sup> | 71.1 (67.8, 74.5) <sup>‡</sup> |  |
| Total energy intake       |                   |                   |                                |                                |                                |                                |                                |                                |                                |  |
| Tetile 1                  | 70.9 (69.4, 72.3) | 66.9 (63.7, 70.1) | 68.1 (64.1, 72.0)              | 71.0 (67.4, 74.5)              | 69.7 (66.0, 73.3)              | 71.8 (66.7, 76.9)              | 72.9 (69.1, 76.7) <sup>‡</sup> | 73.9 (69.9, 77.9) <sup>‡</sup> | 71.7 (67.5, 75.8) <sup>‡</sup> |  |
| Tetile 2                  | 70.7 (69.3, 72.0) | 65.0 (61.8, 68.2) | 70.0 (66.3, 73.6) <sup>†</sup> | 68.2 (64.2, 72.1)              | 70.6 (66.7, 74.6) <sup>†</sup> | 71.5 (67.6, 75.3) <sup>†</sup> | 73.2 (69.6, 76.8) <sup>‡</sup> | 71.1 (66.6, 75.7) <sup>†</sup> | 75.4 (72.0, 78.9) <sup>‡</sup> |  |
| Tetile 3                  | 69.8 (68.7, 71.0) | 68.4 (64.9, 71.9) | 66.7 (63.0, 70.4)              | 68.7 (66.2, 71.3)              | 69.1 (65.0, 73.1)              | 68.2 (64.9, 71.4)              | 69.6 (66.9, 72.3)              | 73.1 (70.3, 75.8) <sup>†</sup> | 75.0 (71.4, 78.5) <sup>†</sup> |  |

\* Data are presented incorporating sample weights and adjusted for clusters and strata of the complex sample design of the National Health and Nutrition Examination Survey (2003–2018). († p < 0.05; ‡ p < 0.01)

Abbreviations: AA, Associate of Arts; BMI, body mass index; CI, confidence interval.

**Table S5. Change in mean BMI by sex among adults in the United States, 2003-2018**

| Years       | Weighted mean BMI             |         |                               |         |                               |         |
|-------------|-------------------------------|---------|-------------------------------|---------|-------------------------------|---------|
|             | Men                           |         | Women                         |         | Both                          |         |
|             | Adjusted $\beta$ *<br>(95%CI) | p-value | Adjusted $\beta$ *<br>(95%CI) | p-value | Adjusted $\beta$ *<br>(95%CI) | p-value |
| 2003 - 2004 | Reference                     |         | Reference                     |         | Reference                     |         |
| 2005 - 2006 | 0.38 (-0.29,1.06)             | 0.259   | 0.44 (-0.47, 1.35)            | 0.338   | 0.38 (-0.23,0.99)             | 0.215   |
| 2007 - 2008 | 0.42 (-0.14,0.97)             | 0.139   | 0.52 (-0.10, 1.15)            | 0.102   | 0.48 (0.04,0.93)              | 0.035   |
| 2009 - 2010 | 0.72 (0.09,1.35)              | 0.025   | 0.64 (0.04, 1.23)             | 0.037   | 0.70 (0.26,1.15)              | 0.002   |
| 2011 - 2012 | 0.64 (0.04, 1.23)             | 0.035   | 1.50 (0.84, 2.16)             | <0.001  | 1.08 (0.55, 1.61)             | <0.001  |
| 2013 - 2014 | 0.73 (0.18, 1.28)             | 0.010   | 1.55 (0.78, 2.32)             | <0.001  | 1.18 (0.66, 1.70)             | <0.001  |
| 2015 - 2016 | 1.28 (0.62, 1.95)             | <0.001  | 1.88 (1.15, 2.61)             | <0.001  | 1.59 (1.03, 2.20)             | <0.001  |
| 2017 - 2018 | 1.62 (1.00, 2.24)             | <0.001  | 2.26 (1.30, 3.21)             | <0.001  | 1.96 (1.34, 2.57)             | <0.001  |
| P for trend |                               | <0.001  |                               | <0.001  |                               | <0.001  |

Abbreviations: CI, confidence interval.

\* Models adjusted for age, sex, race, education, family poverty income ratio, total energy intake and physical activity status.



**Table S6. Change in prevalence of obesity by sex among adults in the United States, 2003-2018**

| Years       | Prevalence of obesity    |         |                          |         |                          |         |
|-------------|--------------------------|---------|--------------------------|---------|--------------------------|---------|
|             | Men                      |         | Women                    |         | Both                     |         |
|             | Adjusted OR *<br>(95%CI) | p-value | Adjusted OR *<br>(95%CI) | p-value | Adjusted OR *<br>(95%CI) | p-value |
| 2003 - 2004 | Reference                |         | Reference                |         | Reference                |         |
| 2005 - 2006 | 1.03 (0.96, 1.09)        | 0.402   | 1.04 (0.98, 1.09)        | 0.197   | 1.03 (0.99, 1.07)        | 0.184   |
| 2007 - 2008 | 1.03 (0.98, 1.08)        | 0.229   | 1.03 (0.99, 1.07)        | 0.193   | 1.03 (1.00, 1.06)        | 0.084   |
| 2009 - 2010 | 1.07 (1.02, 1.13)        | 0.008   | 1.04 (1.01, 1.08)        | 0.026   | 1.06 (1.03, 1.09)        | <0.001  |
| 2011 - 2012 | 1.06 (1.03, 1.11)        | 0.028   | 1.08 (1.04, 1.13)        | <0.001  | 1.07 (1.03, 1.11)        | <0.001  |
| 2013 - 2014 | 1.06 (1.01, 1.11)        | 0.011   | 1.08 (1.05, 1.14)        | <0.001  | 1.08 (1.04, 1.11)        | <0.001  |
| 2015 - 2016 | 1.11 (1.04, 1.18)        | <0.001  | 1.12 (1.07, 1.17)        | <0.001  | 1.11 (1.07, 1.16)        | <0.001  |
| 2017 - 2018 | 1.17 (1.09, 1.24)        | <0.001  | 1.14 (1.08, 1.21)        | <0.001  | 1.15 (1.10, 1.21)        | <0.001  |
| P for trend |                          | <0.001  |                          | <0.001  |                          | <0.001  |

Abbreviations: CI, confidence interval; OR, odds ratio.

Crude model: we did not adjust other covariants.

\* Models adjusted for age, sex, race, education, family poverty income ratio, total energy intake and physical activity status.

**Table S7. Change in prevalence of overweight by sex among adults in the United States, 2003-2018**

| Years       | Prevalence of overweight |         |                          |         |                          |         |
|-------------|--------------------------|---------|--------------------------|---------|--------------------------|---------|
|             | Men                      |         | Women                    |         | Both                     |         |
|             | Adjusted OR *<br>(95%CI) | p-value | Adjusted OR *<br>(95%CI) | p-value | Adjusted OR *<br>(95%CI) | p-value |
| 2003 - 2004 | Reference                |         | Reference                |         | Reference                |         |
| 2005 - 2006 | 1.01 (0.96, 1.06)        | 0.580   | 1.01 (0.95, 1.08)        | 0.690   | 1.01 (0.97, 1.05)        | 0.598   |
| 2007 - 2008 | 1.00 (0.96, 1.05)        | 0.868   | 1.03 (0.98, 1.08)        | 0.206   | 1.02 (0.98, 1.05)        | 0.281   |
| 2009 - 2010 | 1.02 (0.97, 1.08)        | 0.406   | 1.03 (0.98, 1.08)        | 0.248   | 1.03 (0.99, 1.07)        | 0.178   |
| 2011 - 2012 | 1.01 (0.96, 1.06)        | 0.819   | 1.08 (1.03, 1.14)        | 0.002   | 1.05 (1.00, 1.09)        | 0.034   |
| 2013 - 2014 | 1.02 (0.98, 1.07)        | 0.370   | 1.07 (1.02, 1.12)        | 0.010   | 1.05 (1.01, 1.08)        | 0.012   |
| 2015 - 2016 | 1.03 (0.98, 1.08)        | 0.305   | 1.09 (1.04, 1.15)        | 0.001   | 1.06 (1.02, 1.10)        | 0.005   |
| 2017 - 2018 | 1.05 (1.00, 1.11)        | 0.050   | 1.11 (1.05, 1.17)        | <0.001  | 1.08 (1.04, 1.13)        | <0.001  |
| P for trend |                          | <0.001  |                          | <0.001  |                          | <0.001  |

Abbreviations: CI, confidence interval; OR, odds ratio.

\* Models adjusted for age, sex, race, education, family poverty income ratio, total energy intake and physical activity status.

**Table S8. Characteristics of participants according to tertiles of daily total energy intake\***

| Characteristic                 | Total<br>(n=34,625) | Daily total energy intake (Kcal/d) † |                       |                        | P-value |
|--------------------------------|---------------------|--------------------------------------|-----------------------|------------------------|---------|
|                                |                     | Tertile1<br>(n=9,991)                | Tertile2<br>(n=8,990) | Tertile3<br>(n=1,5644) |         |
| Age, years                     | 48.81 ± 0.48        | 49.57 ± 0.28                         | 48.23± 0.28           | 46.38 ± 0.25           | < 0.001 |
| Sex, n (%)                     |                     |                                      |                       |                        | < 0.001 |
| Male, n (%)                    | 16,457 (47.20)      | 3,159 (27.81)                        | 4,442 (48.79)         | 8,856 (56.63)          |         |
| Female, n (%)                  | 18,168 (52.80)      | 6,832 (72.19)                        | 4,548 (51.21)         | 6,788 (43.37)          |         |
| Race, n (%)                    |                     |                                      |                       |                        | < 0.001 |
| Mexican American               | 5,430 (7.85)        | 1,670 (8.43)                         | 1,383 (7.43)          | 2,377 (7.78)           |         |
| Other Hispanic                 | 2,973 (5.02)        | 1,049 (6.46)                         | 698 (4.33)            | 1,226 (4.65)           |         |
| Non-Hispanic White             | 15,635 (69.51)      | 3,905 (64.17)                        | 4,353 (72.29)         | 7,377 (70.77)          |         |
| Non-Hispanic Black             | 7,384 (10.97)       | 2,465 (13.87)                        | 1,759 (9.64)          | 3,160 (10.19)          |         |
| Other Race                     | 3,203 (6.64)        | 902.00 (7.06)                        | 797.00 (6.31)         | 1,504 (6.60)           |         |
| Education, n (%)               |                     |                                      |                       |                        | < 0.001 |
| Less than high school          | 8,224 (14.99)       | 3,085 (19.78)                        | 1,912(13.29)          | 3,227 (13.39)          |         |
| High school graduate           | 8,042 (23.55)       | 2,397 (25.76)                        | 2,051 (22.95)         | 3,594 (22.71)          |         |
| Some college or AA degree      | 10,281 (31.61)      | 2,727 (29.98)                        | 2,748 (32.51)         | 4,806 (31.98)          |         |
| College graduate or above      | 8,049 (29.80)       | 1,773 (24.41)                        | 2,272 (31.20)         | 4,004 (31.88)          |         |
| Poverty income ratio, n (%)    |                     |                                      |                       |                        | < 0.001 |
| < 130%                         | 9,588 (19.89)       | 3,157(24.23)                         | 2,335 (18.50)         | 4,096 (18.41)          |         |
| ≥ 130%                         | 22,370 (80.11)      | 5,931(75.77)                         | 5,972 (81.50)         | 10,467 (81.59)         |         |
| BMI, kg/m <sup>2</sup>         | 29.05 ±0.08         | 29.30±0.11                           | 28.95 ±0.11           | 28.97±0.10             |         |
| BMI, kg/m <sup>2</sup> (group) |                     |                                      |                       |                        | < 0.001 |
| < 25                           | 9,896 (30.04)       | 2,614 (29.47)                        | 2,609 (29.83)         | 4,673 (30.47)          |         |
| 25 - 30                        | 11,505 (32.91)      | 3,245 (31.00)                        | 3,080 (34.39)         | 5,180 (33.09)          |         |
| ≥ 30                           | 13,224 (37.04)      | 4,132 (39.53)                        | 3,301 (35.78)         | 5,791 (36.44)          |         |
| Overweight                     |                     |                                      |                       |                        | 0.3     |
| No                             | 9,788 (29.68)       | 2,583 (29.14)                        | 2,576 (29.33)         | 4,629 (30.16)          |         |
| Yes                            | 24,837 (70.32)      | 7,408 (70.86)                        | 6,414 (70.67)         | 11,015 (69.84)         |         |
| Obesity                        |                     |                                      |                       |                        | < 0.001 |
| No                             | 21,294 (62.65)      | 5,829 (60.14)                        | 5,660 (63.95)         | 9,805 (63.25)          |         |
| Yes                            | 13,331 (37.35)      | 4,162 (39.86)                        | 3,330 (36.05)         | 5,839 (36.75)          |         |
| Physical activity, n (%)       |                     |                                      |                       |                        | < 0.001 |
| Inactive                       | 6,677 (17.45)       | 2,329 (21.39)                        | 1,681 (16.85)         | 2,667 (15.71)          |         |
| Insufficiently active          | 5,548 (17.92)       | 1,540 (16.56)                        | 1,499 (18.54)         | 2,509 (18.29)          |         |
| Sufficiently active            | 19,207 (64.63)      | 5,127 (62.05)                        | 5,007 (64.61)         | 9,073 (66.00)          |         |

\* Data are presented incorporating sample weights and adjusted for clusters and strata of the complex sample design of the National Health and Nutrition Examination

1  
2  
3  
4 Survey (2003-2018).  
5

6 † Values are presented as mean  $\pm$  SE for continuous variables and unweighted  
7  
8  
9 numbers (weighted %) for categorical variables.  
10

11 Abbreviations: AA, Associate of Arts; BMI, body mass index  
12  
13  
14  
15  
16  
17  
18  
19  
20  
21  
22  
23  
24  
25  
26  
27  
28  
29  
30  
31  
32  
33  
34  
35  
36  
37  
38  
39  
40  
41  
42  
43  
44  
45  
46  
47  
48  
49  
50  
51  
52  
53  
54  
55  
56  
57  
58  
59  
60

For peer review only

**STROBE 2007 (v4) checklist of items to be included in reports of observational studies in epidemiology\***  
**Checklist for cohort, case-control, and cross-sectional studies (combined)**

| Section/Topic             | Item # | Recommendation                                                                                                                                                                                                                                                                                                                                                                                                                                                         | Reported on page # |
|---------------------------|--------|------------------------------------------------------------------------------------------------------------------------------------------------------------------------------------------------------------------------------------------------------------------------------------------------------------------------------------------------------------------------------------------------------------------------------------------------------------------------|--------------------|
| Title and abstract        | 1      | (a) Indicate the study's design with a commonly used term in the title or the abstract                                                                                                                                                                                                                                                                                                                                                                                 | 2                  |
|                           |        | (b) Provide in the abstract an informative and balanced summary of what was done and what was found                                                                                                                                                                                                                                                                                                                                                                    | 2,3                |
| <b>Introduction</b>       |        |                                                                                                                                                                                                                                                                                                                                                                                                                                                                        |                    |
| Background/rationale      | 2      | Explain the scientific background and rationale for the investigation being reported                                                                                                                                                                                                                                                                                                                                                                                   | 5                  |
| Objectives                | 3      | State specific objectives, including any pre-specified hypotheses                                                                                                                                                                                                                                                                                                                                                                                                      | 5                  |
| <b>Methods</b>            |        |                                                                                                                                                                                                                                                                                                                                                                                                                                                                        |                    |
| Study design              | 4      | Present key elements of study design early in the paper                                                                                                                                                                                                                                                                                                                                                                                                                | 6                  |
| Setting                   | 5      | Describe the setting, locations, and relevant dates, including periods of recruitment, exposure, follow-up, and data collection                                                                                                                                                                                                                                                                                                                                        | 6                  |
| Participants              | 6      | (a) <i>Cohort study</i> —Give the eligibility criteria, and the sources and methods of selection of participants. Describe methods of follow-up<br><i>Case-control study</i> —Give the eligibility criteria, and the sources and methods of case ascertainment and control selection. Give the rationale for the choice of cases and controls<br><i>Cross-sectional study</i> —Give the eligibility criteria, and the sources and methods of selection of participants | 7                  |
|                           |        | (b) <i>Cohort study</i> —For matched studies, give matching criteria and number of exposed and unexposed<br><i>Case-control study</i> —For matched studies, give matching criteria and the number of controls per case                                                                                                                                                                                                                                                 |                    |
| Variables                 | 7      | Clearly define all outcomes, exposures, predictors, potential confounders, and effect modifiers. Give diagnostic criteria, if applicable                                                                                                                                                                                                                                                                                                                               | 6,7                |
| Data sources/ measurement | 8*     | For each variable of interest, give sources of data and details of methods of assessment (measurement). Describe comparability of assessment methods if there is more than one group                                                                                                                                                                                                                                                                                   | 6,7                |
| Bias                      | 9      | Describe any efforts to address potential sources of bias                                                                                                                                                                                                                                                                                                                                                                                                              | 6,7                |
| Study size                | 10     | Explain how the study size was arrived at                                                                                                                                                                                                                                                                                                                                                                                                                              |                    |
| Quantitative variables    | 11     | Explain how quantitative variables were handled in the analyses. If applicable, describe which groupings were chosen and why                                                                                                                                                                                                                                                                                                                                           | 6,7                |
| Statistical methods       | 12     | (a) Describe all statistical methods, including those used to control for confounding                                                                                                                                                                                                                                                                                                                                                                                  | 7,8                |
|                           |        | (b) Describe any methods used to examine subgroups and interactions                                                                                                                                                                                                                                                                                                                                                                                                    | 7,8                |
|                           |        | (c) Explain how missing data were addressed                                                                                                                                                                                                                                                                                                                                                                                                                            | 7                  |
|                           |        | (d) <i>Cohort study</i> —If applicable, explain how loss to follow-up was addressed<br><i>Case-control study</i> —If applicable, explain how matching of cases and controls was addressed                                                                                                                                                                                                                                                                              | 7,8                |

|                          |     |                                                                                                                                                                                                              |         |
|--------------------------|-----|--------------------------------------------------------------------------------------------------------------------------------------------------------------------------------------------------------------|---------|
|                          |     | <i>Cross-sectional study</i> —If applicable, describe analytical methods taking account of sampling strategy                                                                                                 |         |
|                          |     | (e) Describe any sensitivity analyses                                                                                                                                                                        |         |
| <b>Results</b>           |     |                                                                                                                                                                                                              |         |
| Participants             | 13* | (a) Report numbers of individuals at each stage of study—eg numbers potentially eligible, examined for eligibility, confirmed eligible, included in the study, completing follow-up, and analysed            | 8       |
|                          |     | (b) Give reasons for non-participation at each stage                                                                                                                                                         |         |
|                          |     | (c) Consider use of a flow diagram                                                                                                                                                                           |         |
| Descriptive data         | 14* | (a) Give characteristics of study participants (eg demographic, clinical, social) and information on exposures and potential confounders                                                                     | 8,9     |
|                          |     | (b) Indicate number of participants with missing data for each variable of interest                                                                                                                          | 8,9     |
|                          |     | (c) <i>Cohort study</i> —Summarise follow-up time (eg, average and total amount)                                                                                                                             |         |
| Outcome data             | 15* | <i>Cohort study</i> —Report numbers of outcome events or summary measures over time                                                                                                                          |         |
|                          |     | <i>Case-control study</i> —Report numbers in each exposure category, or summary measures of exposure                                                                                                         |         |
|                          |     | <i>Cross-sectional study</i> —Report numbers of outcome events or summary measures                                                                                                                           | 8,9     |
| Main results             | 16  | (a) Give unadjusted estimates and, if applicable, confounder-adjusted estimates and their precision (eg, 95% confidence interval). Make clear which confounders were adjusted for and why they were included | 9,10,11 |
|                          |     | (b) Report category boundaries when continuous variables were categorized                                                                                                                                    | 9,10,11 |
|                          |     | (c) If relevant, consider translating estimates of relative risk into absolute risk for a meaningful time period                                                                                             |         |
| Other analyses           | 17  | Report other analyses done—eg analyses of subgroups and interactions, and sensitivity analyses                                                                                                               | 10,11   |
| <b>Discussion</b>        |     |                                                                                                                                                                                                              |         |
| Key results              | 18  | Summarise key results with reference to study objectives                                                                                                                                                     | 11      |
| Limitations              | 19  | Discuss limitations of the study, taking into account sources of potential bias or imprecision. Discuss both direction and magnitude of any potential bias                                                   | 13,14   |
| Interpretation           | 20  | Give a cautious overall interpretation of results considering objectives, limitations, multiplicity of analyses, results from similar studies, and other relevant evidence                                   | 14      |
| Generalisability         | 21  | Discuss the generalisability (external validity) of the study results                                                                                                                                        | 14      |
| <b>Other information</b> |     |                                                                                                                                                                                                              |         |
| Funding                  | 22  | Give the source of funding and the role of the funders for the present study and, if applicable, for the original study on which the present article is based                                                | 14,15   |

\*Give information separately for cases and controls in case-control studies and, if applicable, for exposed and unexposed groups in cohort and cross-sectional studies.

**Note:** An Explanation and Elaboration article discusses each checklist item and gives methodological background and published examples of transparent reporting. The STROBE checklist is best used in conjunction with this article (freely available on the Web sites of PLoS Medicine at <http://www.plosmedicine.org/>, Annals of Internal Medicine at <http://www.annals.org/>, and Epidemiology at <http://www.epidem.com/>). Information on the STROBE Initiative is available at [www.strobe-statement.org](http://www.strobe-statement.org).

# BMJ Open

## Trends in body mass index, overweight and obesity among adults in the United States, the NHANES from 2003 through 2018: a repeat cross-sectional survey

|                                 |                                                                                                                                                                                                                                                                                                                                |
|---------------------------------|--------------------------------------------------------------------------------------------------------------------------------------------------------------------------------------------------------------------------------------------------------------------------------------------------------------------------------|
| Journal:                        | <i>BMJ Open</i>                                                                                                                                                                                                                                                                                                                |
| Manuscript ID                   | bmjopen-2022-065425.R2                                                                                                                                                                                                                                                                                                         |
| Article Type:                   | Original research                                                                                                                                                                                                                                                                                                              |
| Date Submitted by the Author:   | 03-Dec-2022                                                                                                                                                                                                                                                                                                                    |
| Complete List of Authors:       | Li, Mingxi; Beijing Rehabilitation Hospital, Capital medical University<br>Gong, Weijun; Beijing Rehabilitation Hospital, Capital Medical University<br>Wang, Shidong; Beijing University of Chinese Medicine Affiliated Dongzhimen Hospital<br>Li, Zhe; Beijing University of Chinese Medicine Affiliated Dongzhimen Hospital |
| <b>Primary Subject Heading</b>: | Public health                                                                                                                                                                                                                                                                                                                  |
| Secondary Subject Heading:      | Public health                                                                                                                                                                                                                                                                                                                  |
| Keywords:                       | PUBLIC HEALTH, General endocrinology < DIABETES & ENDOCRINOLOGY, EPIDEMIOLOGY                                                                                                                                                                                                                                                  |
|                                 |                                                                                                                                                                                                                                                                                                                                |

SCHOLARONE™  
Manuscripts



I, the Submitting Author has the right to grant and does grant on behalf of all authors of the Work (as defined in the below author licence), an exclusive licence and/or a non-exclusive licence for contributions from authors who are: i) UK Crown employees; ii) where BMJ has agreed a CC-BY licence shall apply, and/or iii) in accordance with the terms applicable for US Federal Government officers or employees acting as part of their official duties; on a worldwide, perpetual, irrevocable, royalty-free basis to BMJ Publishing Group Ltd ("BMJ") its licensees and where the relevant Journal is co-owned by BMJ to the co-owners of the Journal, to publish the Work in this journal and any other BMJ products and to exploit all rights, as set out in our [licence](#).

The Submitting Author accepts and understands that any supply made under these terms is made by BMJ to the Submitting Author unless you are acting as an employee on behalf of your employer or a postgraduate student of an affiliated institution which is paying any applicable article publishing charge ("APC") for Open Access articles. Where the Submitting Author wishes to make the Work available on an Open Access basis (and intends to pay the relevant APC), the terms of reuse of such Open Access shall be governed by a Creative Commons licence – details of these licences and which [Creative Commons](#) licence will apply to this Work are set out in our licence referred to above.

Other than as permitted in any relevant BMJ Author's Self Archiving Policies, I confirm this Work has not been accepted for publication elsewhere, is not being considered for publication elsewhere and does not duplicate material already published. I confirm all authors consent to publication of this Work and authorise the granting of this licence.



1  
2  
3  
4 **Trends in body mass index, overweight and obesity among adults in the United States, the**

5  
6  
7 **NHANES from 2003 through 2018: a repeat cross-sectional survey**

8  
9  
10 **Authors:**

11  
12 1. Mingxi Li<sup>1&</sup>, MM 2. Weijun Gong<sup>1&</sup>, PhD 3. Shidong Wang<sup>2</sup>, PhD 4. Zhe Li<sup>2</sup>, PhD

13  
14  
15 **Author's affiliations:**

16  
17  
18 1. Beijing Rehabilitation Hospital, Capital Medical University, Xixiazhuang Badachu Road,

19  
20 Shijingshan District, 100144, Beijing, China

21  
22  
23 2. Dongzhimen Hospital, Beijing University of Chinese Medicine, No.5 Haiyuncang, Dongcheng

24  
25  
26 District, 100700, Beijing, China

27  
28  
29 &These authors contributed equally to this work and should be considered co-first authors

30  
31  
32 **Corresponding Author:**

33  
34  
35 **Name:** Zhe Li

36  
37  
38 **Address:** Dongzhimen Hospital, Beijing University of Chinese Medicine, No.5 Haiyuncang,

39  
40 Dongcheng District, 100700, Beijing, China

41  
42  
43 **Phone numbers:** +86-01084013293

44  
45  
46 **E-mail address:** lizhetcm@126.com

47  
48  
49 **manuscript word count: 3580**

## Abstract

**Objectives:** To analyse detailed trends in adult obesity from 2003 through 2018 in the United States (US), and provide the latest national estimates of adult obesity in 2017-2018.

**Design, Setting, and Participants:** Analysis of data, including measured height and weight, obtained from 42,266 adults aged  $\geq 20$  years from the National Health and Nutrition Examination Survey (NHANES), a cross-sectional, nationally representative sample of the US population.

**Exposure:** Survey period.

**Primary Outcome Measures:** The mean body mass index (BMI) and prevalence of overweight and obesity.

**Results:** In 2017-2018, the prevalence of overweight (including obesity, BMI  $\geq 25$  kg/m<sup>2</sup>) and obesity (BMI  $\geq 30$  kg/m<sup>2</sup>) was 73.8% (95% CI: 71.1%-76.4%) and 42.8% (95% CI: 39.5%-46.1%), respectively. From 2003 through 2018, a significant increase in the prevalence of overweight (including obesity, overall adjusted OR for 2017-2018 vs. 2003-2004, 1.08 [95% CI: 1.04-1.13]) and obesity (overall adjusted OR for 2017-2018 vs. 2003-2004, 1.15 [95% CI: 1.10-1.21]) was found among American adults. However, annual changes in mean BMI and the prevalence of overweight and obesity did not differ significantly before and after 2009-2010. The prevalence of overweight and obesity varied significantly by age, sex, race, education, daily total energy intake, economic conditions, and physical activity status (all  $p < 0.05$ ).

**Conclusions:** Although the prevalence of adult obesity continues to rise, there have been no significant changes in the annual growth of adult obesity prevalence between 2003-2004 and 2017-2018. In 2017-2018, the prevalence of obesity was 42.8%, which equates to 76 million American adults at risk for serious and costly chronic conditions. The prevalence of obesity was higher among older adults (aged

1  
2  
3  
4 60-69 years), females, non-Hispanic Blacks, and those who did not graduate college, were physically  
5  
6 inactive, reported lower daily total energy intake, and had poor economic status.  
7  
8

9 **Keywords:** American adults; body mass index; overweight/obesity; trends; NHANES  
10

### 11 **Strengths and limitations of this study**

- 14 1. Our present study used a larger sample size as well as a longer time span than the previous studies.
- 15  
16 2. Although NHANES is designed to provide nationally representative estimates, it is a repeated cross-  
17  
18 sectional survey, which precludes within-individual change in BMI or obesity.  
19
- 20 3. Our study assessed annual changes in BMI and obesity, and the potential effects of the 2008–2009  
21  
22 global financial crisis among US adults.  
23  
24
- 25 4. Obesity was defined mainly based on measurements of BMI, which does not measure body fat  
26  
27  
28  
29 directly.  
30  
31  
32  
33  
34  
35  
36  
37  
38  
39  
40  
41  
42  
43  
44  
45  
46  
47  
48  
49  
50  
51  
52  
53  
54  
55  
56  
57

## 58 **1. Introduction**

59  
60

1  
2  
3  
4 Obesity is one of the most common risk factors for chronic diseases such as diabetes mellitus,  
5  
6 cardiovascular diseases, renal damage, and cancers, which affected 670 million adults globally in  
7  
8 2016[1-7]. In the United States (US), the obesity rate has been on the rise since the 1980s [8]. By 2030,  
9  
10 obesity is expected to reach a prevalence of 48.9% among American adults [9].  
11  
12  
13

14 Some studies have reported trends in obesity prevalence among American adults using data from  
15  
16 National Health and Nutrition Examination Survey (NHANES) [8, 10-19]. Between 1976-1980 and  
17  
18 1988-1994, the prevalence of obesity among American adults increased from 14.5% to 22.5% [10]. The  
19  
20 prevalence of obesity increased from 22.9% to 30.5% from 1988-1994 through 1999-2000, maintaining  
21  
22 similar growth rates of approximately 8% [11]. Over the period from 1999-2000 to 2017-2018, there  
23  
24 was a larger increase in the prevalence of obesity among males (from 27.5% to 43.0%) than seen  
25  
26 previously and a similar growth in the prevalence among females (from 33.4% to 41.9%) [14]. The  
27  
28 majority of previous studies have focused on differences in the prevalence of obesity by age, sex, and  
29  
30 race. Differences in the prevalence of obesity by other covariates such as educational level, economic  
31  
32 status, daily total energy intake, and physical activity status have been scarcely studied. The effects of  
33  
34 the 2008–2009 global financial crisis on economic status, physical activity status, and daily total energy  
35  
36 intake are still unknown. How changes in economic status, physical activity status, and daily total  
37  
38 energy intake may impact the prevalence of overweight and obesity is less well understood.  
39  
40  
41  
42  
43  
44  
45  
46  
47

48 In this study, our primary aim was to provide the latest national estimates of adult obesity and  
49  
50 evaluate trends in mean body mass index (BMI) and adult obesity from 2003 through 2018. The  
51  
52 secondary aims of our study were as follows: (1) To explore the changes in mean BMI and adult  
53  
54 obesity before and after 2009-2010. (i.e., before and after the 2008–2009 global financial crisis taken  
55  
56 place); and (2) To assess how these trends might vary by age, sex, race, educational level, economic  
57  
58  
59  
60

1  
2  
3  
4 status, daily total energy intake, and physical activity status.  
5

## 6 **2. Materials and methods**

### 7 *2.1 Database and participants*

8  
9  
10  
11 The NHANES is a nationally representative sample of the US population, which collects data  
12 from survey participants through household interviews, standardized physical examinations, and  
13 laboratory tests in mobile examination centres [20]. The survey is unique in that it combines data from  
14 interviews and physical examinations. The NHANES released data every 2 years to ensure an adequate  
15 sample size for analyses and to protect confidentiality. The survey examines a nationally representative  
16 sample of approximately 5,000 people each year. The NHANES interview includes demographic,  
17 socioeconomic, dietary, and health-related questions. The examination component consists of medical,  
18 dental, and physiological measurements, as well as laboratory tests administered by highly trained  
19 medical personnel. Detailed information on the NHANES procedures is available in the literature [21].  
20  
21  
22  
23  
24  
25  
26  
27  
28  
29  
30  
31  
32  
33  
34

35 The present study used NHANES data from adults aged  $\geq 20$  years ( $N = 44,790$ ) collected from 8  
36 survey cycles from 2003 through 2018. Among the 44,790 participants (21,668 males and 23,122  
37 females), 42,266 had complete data on BMI, and were included in the final analysis.  
38  
39  
40  
41  
42

### 43 *2.2 Data collection*

44  
45 Information about anthropometric measurements (including height and weight) and BMI was  
46 obtained from examination data. Information about age, sex, race, education, and poverty income ratio  
47 (PIR) was obtained from demographic data. Data on total energy intake were obtained from the total  
48 nutrient intake file from the second-day dietary interview, which contains a summary of the  
49 individual's nutrition from all foods and beverages provided on the dietary recall. Total energy intake  
50 was categorized into tertiles. PIR was a ratio of family income to the poverty threshold, which was  
51  
52  
53  
54  
55  
56  
57  
58  
59  
60

1  
2  
3  
4 calculated by dividing family income by the poverty guidelines for the year the survey was completed.  
5  
6 PIR was categorized into two groups: <130% and ≥130%. This classification of PIR has been used in a  
7  
8  
9 previous study [22]. Data on physical activity were obtained from the physical activity questionnaire.  
10  
11 Based on the 2018 Physical Activity Guidelines for Americans, respondents who engaged in moderate-  
12  
13 intensity aerobic activity for 150 min/week, vigorous-intensity aerobic activity for 75 min/week, or an  
14  
15 equivalent combination of both (1 min of vigorous-intensity physical activity is equivalent to 2 min of  
16  
17 moderate-intensity physical activity) were defined as meeting the guidelines [23]. In our analysis,  
18  
19 physical activity was categorized into three levels: sufficiently active, insufficiently active, and  
20  
21 inactive. Sufficiently active was defined as moderate-intensity aerobic activity for 150 min/week,  
22  
23 vigorous-intensity aerobic activity for 75 min/week, or an equivalent combination of both.  
24  
25 Insufficiently active was defined as some aerobic activity for 10-149 min/week, but not enough to meet  
26  
27 the guidelines. Inactive was defined as some physical activity (< 10 min/week) or no reported physical  
28  
29 activity [23]. This classification of physical activity has been used in previous studies [24].  
30  
31  
32  
33  
34  
35  
36

### 37 *2.3 Statistical analysis*

38  
39  
40 According to the World Health Organization (WHO) classification, we defined overweight,  
41  
42 including obesity, as BMI ≥ 25 kg/m<sup>2</sup> and obesity as ≥ 30 kg/m<sup>2</sup>. Overall, the mean BMI and  
43  
44 prevalence of overweight and obesity in each survey cycle were calculated by incorporating sample  
45  
46 weights and adjusting for clusters and strata of the complex sample design of the NHANES.  
47  
48 Individuals with missing demographic information on height or weight measurements were excluded  
49  
50  
51 from the analyses.  
52  
53

54  
55  
56 In Table 1, continuous variables are presented as weighted means and standard errors, while  
57  
58 categorical variables are presented as unweighted counts and weighted proportions. Comparisons  
59  
60

1  
2  
3  
4 between survey cycles were made using the Wald test (categorical variables) or Kruskal–Wallis rank-  
5  
6 sum test (skewed distribution).  
7

8  
9 We used survey-weighted generalized linear regression models to evaluate the trends in BMI and  
10  
11 the prevalence of overweight and obesity by survey period. Multivariate survey-weighted generalized  
12  
13 linear regression models were adjusted for age, sex, race, education, PIR, total energy intake, and  
14  
15 physical activity status. A p value for the trends was obtained by entering the median value of each  
16  
17 category of BMI, the prevalence of overweight and obesity as a continuous variable, and rerunning the  
18  
19 corresponding survey-weighted generalized linear regression models.  
20  
21  
22  
23

24  
25 We used a previously described method to compare trends in mean BMI and prevalence of  
26  
27 overweight and obesity before and after 2009–2010 to explore the potential impact of the 2008–2009  
28  
29 global financial crisis [25]. We calculated annual mean BMI changes as the absolute value of the  
30  
31 difference in mean BMI between the start and end years divided by the total number of years covered.  
32  
33 We also calculated the annual relative changes in overweight and obesity prevalence as the absolute  
34  
35 value of the difference in prevalence between the start and end years divided by the prevalence in the  
36  
37 start year annualized by accounting for compounding. Welch's t tests were used to compare trends in  
38  
39 mean BMI and prevalence of overweight and obesity before and after 2009–2010.  
40  
41  
42  
43  
44

45  
46 All simulations and analyses were performed using R software (R Foundation for Statistical  
47  
48 Computing, Vienna, Austria, Version 3.6.3) and the “survey” package (e.g., svymean and svyglm),  
49  
50 which considers sampling weights (16-year exam weight), clustering, and stratification of the complex  
51  
52 survey design.[26] A two-sided p value <0.05 was considered to be statistically significant.  
53  
54

#### 55 56 *2.4 Ethics statement*

57  
58 Approval was obtained from the National Center for Health Statistics (NCHS) Research Ethics  
59  
60

1  
2  
3  
4 Review Board, and all participants provided written informed consent. Therefore, there was no need for  
5  
6 any ethical consent in this study.  
7  
8

### 9 *2.5 Patient and public involvement*

10  
11 The public was not involved in the design, conduct, reporting, or dissemination plans of our study.  
12  
13

## 14 **3. Results**

15  
16 The demographic characteristics of all participants according to the 8 survey cycles are listed in  
17 Table 1. In total, 42,266 participants (20,408 males and 21,858 females) were included in our final  
18  
19 analysis. The weighted mean (SE) age of the population was 47.11 (0.20) years, 47.97% of the  
20  
21 population were male, and the weighted mean (SE) BMI was 28.93 (0.07) kg/m<sup>2</sup>. Approximately two-  
22  
23 thirds (67.36%) were non-Hispanic White, 11.41% were non-Hispanic Black, 8.38% were Mexican  
24  
25 American, 5.33% were Hispanic and 7.51% were categorized as “other race”. More than 80% had a  
26  
27 minimum of a high school education and approximately 80% reported good economic status (PIR ≥  
28  
29 130%). The average (SE) daily total energy intake was 2027.31 (7.96) kcal. Approximately 65%  
30  
31 reported meeting physical activity guidelines. The prevalence of overweight and obesity increased over  
32  
33 time, whereas the inverse was true for normal weight (p = 0.002). The prevalence of overweight and  
34  
35 obesity varied significantly by age, sex, race, education, daily total energy intake, economic conditions,  
36  
37 and physical activity status (Table S1).  
38  
39  
40  
41  
42  
43  
44  
45  
46  
47  
48  
49  
50  
51  
52  
53  
54  
55  
56  
57  
58  
59  
60



1  
2  
3  
4  
5  
6  
7  
8  
9  
10  
11  
12  
13  
14  
15  
16  
17  
18  
19  
20  
21  
22  
23  
24  
25  
26  
27  
28  
29  
30  
31  
32  
33  
34  
35  
36  
37  
38  
39  
40  
41  
42  
43  
44  
45  
46  
47  
48  
49  
50  
51  
52  
53  
54  
55  
56  
57  
58  
59  
60

For peer review only

Table 1. Baseline characteristics of participants. \*

National Health and Nutrition Examination Survey cycles †

| Characteristics       | Total<br>(n= 42,266) | 2003/2004<br>(n = 4,647) | 2005/2006<br>(n = 4,680) | 2007/2008<br>(n = 5,607) | 2009/2010<br>(n = 5,994) | 2011/2012<br>(n = 5,237) | 2013/2014<br>(n = 5,520) | 2015/2016<br>(n = 5,406) | 2017/2018<br>(n = 5,175) |
|-----------------------|----------------------|--------------------------|--------------------------|--------------------------|--------------------------|--------------------------|--------------------------|--------------------------|--------------------------|
| Age, years            | 47.11 ± 0.20         | 46.02 ± 0.52             | 46.42 ± 0.74             | 46.55 ± 0.44             | 46.92 ± 0.49             | 47.21 ± 0.82             | 47.45 ± 0.38             | 47.92 ± 0.58             | 48.14 ± 0.53             |
| Age, years (group)    |                      |                          |                          |                          |                          |                          |                          |                          |                          |
| 20 - 30               | 8,033 (20.5)         | 940 (21.0)               | 1,101 (20.5)             | 928 (20.5)               | 1,134 (21.1)             | 1,043 (20.6)             | 1,025 (20.6)             | 1,016 (20.2)             | 846 (19.7)               |
| 30 - 39               | 7,175 (18.4)         | 759 (20.3)               | 823 (19.8)               | 997 (19.1)               | 1,010 (18.1)             | 916 (17.5)               | 951 (17.4)               | 921 (17.4)               | 798 (19.0)               |
| 40 - 49               | 7,035 (19.4)         | 742 (21.6)               | 782 (21.2)               | 920 (21.2)               | 1,063 (19.8)             | 869 (19.4)               | 991 (18.9)               | 896 (17.7)               | 772 (16.3)               |
| 50 - 59               | 6,714 (18.1)         | 596 (16.6)               | 622 (16.9)               | 902 (17.8)               | 956 (18.2)               | 877 (18.9)               | 914 (18.1)               | 917 (18.8)               | 930 (19.3)               |
| 60 - 69               | 6,629 (12.8)         | 695 (10.2)               | 631 (11.0)               | 894 (11.0)               | 876 (12.0)               | 820 (13.5)               | 866 (14.1)               | 863 (14.5)               | 984 (15.1)               |
| ≥ 70                  | 6,680 (10.8)         | 915 (10.5)               | 721 (10.3)               | 966 (10.5)               | 955 (10.8)               | 712 (10.1)               | 773 (11.0)               | 793 (11.4)               | 845 (11.6)               |
| Sex, n (%)            |                      |                          |                          |                          |                          |                          |                          |                          |                          |
| Male, n (%)           | 20,408 (48.0)        | 2,237 (48.1)             | 2,237 (48.2)             | 2,746 (48.0)             | 2,889 (48.1)             | 2,585 (48.1)             | 2,638 (48.0)             | 2,638 (47.6)             | 2,493 (47.7)             |
| Female, n (%)         | 21,858 (52.0)        | 2,410 (51.9)             | 2,443 (51.8)             | 2,861 (52.0)             | 3,105 (51.9)             | 4,652 (51.9)             | 2,882 (52.0)             | 2,882 (52.4)             | 2,682 (52.3)             |
| Race                  |                      |                          |                          |                          |                          |                          |                          |                          |                          |
| Mexican American      | 6,805 (8.4)          | 931 (8.0)                | 944 (8.0)                | 967(8.3)                 | 1,096 (8.6)              | 509 (7.7)                | 737 (9.1)                | 936 (8.8)                | 685 (8.7)                |
| Other Hispanic        | 3,755 (5.3)          | 139 (3.5)                | 148 (3.4)                | 629 (4.9)                | 610 (5.0)                | 538 (6.5)                | 488 (5.6)                | 720 (6.4)                | 483 (6.9)                |
| Non-Hispanic White    | 18,120 (67.4)        | 2,464 (72.0)             | 2,338 (71.9)             | 2,625 (69.6)             | 2,865 (67.9)             | 1,917 (66.5)             | 2,366 (65.9)             | 1,767 (64.0)             | 1,778 (62.4)             |
| Non-Hispanic Black    | 9,094 (11.4)         | 910 (11.2)               | 1,064 (11.4)             | 1,155 (11.2)             | 1,087 (11.4)             | 1,382 (11.5)             | 1,135 (11.5)             | 1,142 (11.4)             | 1,219 (11.5)             |
| Other Race            | 4,492 (7.5)          | 203 (5.4)                | 186 (5.2)                | 231 (6.1)                | 336 (7.2)                | 891 (7.7)                | 794 (7.9)                | 841 (9.4)                | 1,010 (10.5)             |
| Education, n (%)      |                      |                          |                          |                          |                          |                          |                          |                          |                          |
| Less than high school | 10,814 (16.4)        | 1,362 (18.1)             | 1,290 (17.4)             | 1,728 (20.3)             | 1,710 (18.9)             | 1,235 (16.4)             | 1,191 (15.2)             | 1,277 (14.3)             | 1,021 (11.0)             |
| High school graduate  | 9,787 (23.6)         | 1,167 (27.1)             | 1,119 (25.0)             | 1,392 (25.4)             | 1,376 (22.9)             | 1,098 (19.8)             | 1,232 (21.6)             | 1,172 (20.8)             | 1,231 (27.0)             |

|    |                                |               |                |                |               |               |               |               |               |               |
|----|--------------------------------|---------------|----------------|----------------|---------------|---------------|---------------|---------------|---------------|---------------|
| 5  | Some college or AA degree      | 12,266 (31.4) | 1,263 (31.5)   | 1,334 (31.3)   | 1,440 (29.0)  | 1,679 (30.3)  | 1,576 (32.4)  | 1,704 (32.9)  | 1,602 (32.5)  | 1,668 (30.8)  |
| 6  | College graduate or above      | 9,345 (28.6)  | 847 (23.2)     | 931 (26.1)     | 1,041 (25.3)  | 1,216 (27.7)  | 1,324 (31.3)  | 1,389 (30.3)  | 1,352 (32.4)  | 1,245 (31.1)  |
| 7  | Poverty income ratio, n (%)    |               |                |                |               |               |               |               |               |               |
| 8  | < 130%                         | 12,129 (21.3) | 1,264 (20.5)   | 1,167 (17.1)   | 1,552 (20.4)  | 1,817 (21.7)  | 1,724 (24.6)  | 1,762 (24.7)  | 1,568 (20.9)  | 1,275 (20.1)  |
| 9  | ≥ 130%                         | 26,450 (78.7) | 3,119 (79.5)   | 3,294 (82.9)   | 3,536 (79.6)  | 3,592 (78.3)  | 3,078 (75.4)  | 3,335 (75.3)  | 3,280 (79.1)  | 3,216 (79.9)  |
| 10 | BMI, kg/m <sup>2</sup>         | 28.93 ± 0.07  | 28.24 ± 0.15   | 28.57 ± 0.23   | 28.54 ± 0.16  | 28.75 ± 0.13  | 28.73 ± 0.21  | 29.17 ± 0.17  | 29.42 ± 0.25  | 29.86 ± 0.26  |
| 11 | BMI, kg/m <sup>2</sup> (group) |               |                |                |               |               |               |               |               |               |
| 12 | < 25                           | 12,522 (30.7) | 1,480 (33.7)   | 1,432 (32.9)   | 1,628 (32.0)  | 1,684 (30.9)  | 1,714 (31.7)  | 1,700 (30.0)  | 1,517 (28.7)  | 1,367 (26.9)  |
| 13 | 25 - 30                        | 14,046 (32.9) | 1,632 (34.1)   | 1,608 (32.9)   | 1,934 (34.3)  | 2,030 (33.4)  | 1,677 (33.8)  | 1,767 (32.6)  | 1,731 (31.9)  | 1,667 (30.8)  |
| 14 | ≥ 30                           | 15,698 (36.4) | 1,535 (32.2)   | 1,640 (34.2)   | 2,045 (33.7)  | 2,280 (35.8)  | 1,846 (34.6)  | 2,053 (37.4)  | 2,158 (39.4)  | 2,141 (42.3)  |
| 15 | Total energy intake, Kcal/d    | 2,027.31±7.96 | 2,113.90±13.81 | 2,051.01±25.07 | 2016.62±20.87 | 2061.43±27.10 | 2014.61±18.59 | 2017.22±23.24 | 1970.20±23.28 | 1980.34±23.18 |
| 16 | Physical activity, n (%)       |               |                |                |               |               |               |               |               |               |
| 17 | Inactive                       | 8,504 (18.1)  | 150 (5.6)      | 142 (4.4)      | 1,656 (23.1)  | 1,711 (23.7)  | 355 (6.8)     | 1,562 (26.3)  | 1,565 (23.0)  | 1,363 (21.2)  |
| 18 | Insufficiently active          | 6,649 (17.5)  | 1,380 (50.2)   | 1,403 (47.5)   | 734 (13.0)    | 817 (13.7)    | 536 (10.3)    | 568 (9.7)     | 567 (9.9)     | 644 (11.3)    |
| 19 | Sufficiently active            | 23,320 (64.4) | 1,156 (44.2)   | 1,303 (48.2)   | 3,217 (63.8)  | 3,466 (62.7)  | 4,346 (82.9)  | 3,390 (64.0)  | 3,274 (67.1)  | 3,168 (67.5)  |

\* Data are presented incorporating sample weights and adjusted for clusters and strata of the complex sample design of the National Health and Nutrition Examination Survey (2003-2018).

† Values are presented as mean ± SE for continuous variables and unweighted numbers (weighted %) for categorical variables.

Abbreviations: AA, Associate of Arts; BMI, body mass index; CI, confidence interval.

1  
2  
3  
4 The mean (SE) BMI levels increased from 28.24 (0.07) kg/m<sup>2</sup> in 2003-2004 to 29.86 (0.26) kg/m<sup>2</sup>  
5  
6 in 2017-2018 (Table S2). In 2017-2018, the obesity prevalence was 42.8% (95% CI: 39.5%-46.1%),  
7  
8 increasing more than 10% from 32.3% in 2003-2004 (95% CI: 29.9%-34.6%) (Table S3). Consistent  
9  
10 with the increase in mean BMI and obesity prevalence, we found that the prevalence of overweight  
11  
12 (including obesity) increased from 66.3% (95% CI: 64.4%-68.3%) in 2003-2004 to 73.8% (95% CI:  
13  
14 71.1%-76.4%) in 2017-2018 (Table S4). We used survey-weighted generalized linear regression  
15  
16 models to evaluate the trends in BMI and prevalence of overweight and obesity by survey period  
17  
18 (Table 2). Compared with 2003-2004, the mean (SE) BMI increased by 1.96 kg/m<sup>2</sup> (95% CI: 1.34-2.57,  
19  
20 p < .001) in 2017-2018 after adjusting for age, sex, race, education, PIR, and physical activity status  
21  
22 (Table 2, Table S5). The findings were similar for the prevalence of overweight and obesity. Compared  
23  
24 with 2003-2004, the adjusted odds ratios for the prevalence of overweight (including obesity) and  
25  
26 obesity were 1.08 (95% CI: 1.04-1.13, p < .001) and 1.15 (95% CI 1.10-1.21, p < .001), respectively  
27  
28 (Table 2, Table S6, Table S7). However, we found no significant effect of the survey cycle on the  
29  
30 prevalence of overweight among males after adjusting for potential confounding variables (adjusted  
31  
32 odds ratio 1.05, 95% CI: 1.00-1.11, p = 0.050) (Table S7).  
33  
34  
35  
36  
37  
38  
39  
40  
41  
42  
43  
44  
45  
46  
47  
48  
49  
50  
51  
52  
53  
54  
55  
56  
57  
58  
59  
60

**Table 2. Change in BMI, overweight and obesity over time among adults in the United States,****2003-2018**

| Years              | Mean BMI                      |         | Prevalence of overweight |         | Prevalence of obesity    |         |
|--------------------|-------------------------------|---------|--------------------------|---------|--------------------------|---------|
|                    | Adjusted $\beta$ *<br>(95%CI) | p-value | Adjusted OR *<br>(95%CI) | p-value | Adjusted OR *<br>(95%CI) | p-value |
| <b>2003 - 2004</b> | Reference                     |         | Reference                |         | Reference                |         |
| <b>2005 - 2006</b> | 0.38 (-0.23,0.99)             | 0.215   | 1.01 (0.97, 1.05)        | 0.598   | 1.03 (0.99, 1.07)        | 0.184   |
| <b>2007 - 2008</b> | 0.48 (0.04,0.93)              | 0.035   | 1.02 (0.98, 1.05)        | 0.281   | 1.03 (1.00, 1.06)        | 0.084   |
| <b>2009 - 2010</b> | 0.70 (0.26,1.15)              | 0.002   | 1.03 (0.99, 1.07)        | 0.178   | 1.06 (1.03, 1.09)        | <0.001  |
| <b>2011 - 2012</b> | 1.08 (0.55, 1.61)             | <0.001  | 1.05 (1.00, 1.09)        | 0.034   | 1.07 (1.03, 1.11)        | <0.001  |
| <b>2013 - 2014</b> | 1.18 (0.66, 1.70)             | <0.001  | 1.05 (1.01, 1.08)        | 0.012   | 1.08 (1.04, 1.11)        | <0.001  |
| <b>2015 - 2016</b> | 1.59 (1.03, 2.20)             | <0.001  | 1.06 (1.02,1.10)         | 0.005   | 1.11 (1.07, 1.16)        | <0.001  |
| <b>2017 - 2018</b> | 1.96 (1.34, 2.57)             | <0.001  | 1.08 (1.04, 1.13)        | <0.001  | 1.15 (1.10, 1.21)        | <0.001  |
| <b>P for trend</b> |                               | <0.001  |                          | <0.001  |                          | <0.001  |

Abbreviations: BMI, body mass index; CI, confidence interval; OR, odds ratio.

\* Models adjusted for age, sex, race, education, family poverty income ratio, daily total energy intake and physical activity status.

1  
2  
3  
4 Table 3 shows the annual change in mean BMI as well as overweight and obesity prevalence from  
5  
6 2003-2004 to 2009-2010 and from 2011-2012 to 2017-2018. The increase in mean BMI was somewhat  
7  
8 larger after 2009-2010 (0.12 kg/m<sup>2</sup> annual relative increase, 95% CI: 0.06-0.19) than before 2009-2010  
9  
10 (0.07 kg/m<sup>2</sup> annual relative increase, 95% CI: 0.02-0.13). However, this difference was not statistically  
11  
12 significant (p = 0.848). Annual changes in the prevalence of overweight and obesity were similar. The  
13  
14 acceleration in the rise of obesity prevalence was mainly due to an increase in the prevalence of obesity  
15  
16 among those who were in a better economic status (0.40% annual relative increase, 95% CI: -1.11%-  
17  
18 1.93% vs. 2.97% annual relative increase, 95% CI: 1.75%-4.20%). Again, this difference was not  
19  
20 significantly different (p = 0.985). Likewise, for the prevalence of overweight (including obesity), the  
21  
22 annual increase was numerically faster after 2009-2010 than before 2009-2010 (0.6%, 95% CI: -0.08%-  
23  
24 1.27% vs. 0.72%, 0.15%-1.29%; p = 0.584). Remarkably, the prevalence of overweight (including  
25  
26 obesity) was nearly unchanged among those with poor economic conditions after 2009-2010 (0.00%  
27  
28 annual relative increase, 95% CI: -0.96%-0.97%) compared with before 2009-2010 (1.82% annual  
29  
30 relative increase, 95% CI: 0.55%-3.10%, p = 0.037). Meanwhile, both males and females with poor  
31  
32 economic conditions had a slower increase in BMI and the prevalence of overweight and obesity after  
33  
34 2009-2010 compared with before 2009-2010. In contrast, a larger increase was found among those with  
35  
36 good economic conditions after 2009-2010, although without statistical significance (p > 0.05).  
37  
38  
39  
40  
41  
42  
43  
44  
45  
46  
47  
48  
49  
50  
51  
52  
53  
54  
55  
56  
57  
58  
59  
60

**Table 3. Annual change in BMI, overweight, obesity and economic status during 2003-2010 and 2011-2018**

| Characteristic                                             | Male               |                     |          | Female              |                     |          | Both                |                     |              |
|------------------------------------------------------------|--------------------|---------------------|----------|---------------------|---------------------|----------|---------------------|---------------------|--------------|
|                                                            | 2003/04-2009/2010  | 2011/12-2017/2018   | p-value* | 2003/2004-2009/2010 | 2011/2012-2017/2018 | p-value* | 2003/2004-2009/2010 | 2011/2012-2017/2018 | p-value*     |
| <b>Change (95% CI) in mean BMI (kg/m<sup>2</sup>)</b>      |                    |                     |          |                     |                     |          |                     |                     |              |
| Overall                                                    | 0.07 (0.02, 0.13)  | 0.12 (0.06, 0.19)   | 0.848    | 0.65 (-0.01, 0.14)  | 0.13 (-0.39, 2.76)  | 0.846    | 0.07 (0.02, 0.13)   | 0.12 (0.06, 0.19)   | 0.848        |
| PIR<130%                                                   | 0.17 (0.02, 0.32)  | 0.08 (-0.06, 0.22)  | 0.245    | 0.17 (0.04, 0.30)   | 0.06 (-0.09, 0.21)  | 0.186    | 0.17 (0.05, 0.28)   | 0.07 (-0.04, 0.18)  | 0.170        |
| PIR≥130%                                                   | 0.07 (-0.01, 0.14) | 0.11 (0.04, 0.17)   | 0.716    | 0.15 (-0.04, 0.13)  | 0.16 (0.07, 0.25)   | 0.943    | 0.06 (0.00, 0.11)   | 0.13 (0.07, 0.20)   | 0.922        |
| <b>Percentage change (95% CI) in overweight prevalence</b> |                    |                     |          |                     |                     |          |                     |                     |              |
| Overall                                                    | 0.69 (-0.18, 1.56) | 0.50 (-0.24, 1.24)  | 0.393    | 0.50 (-0.45, 1.47)  | 0.95 (0.30, 1.60)   | 0.746    | 0.60 (-0.08, 1.27)  | 0.72 (0.15, 1.29)   | 0.584        |
| PIR<130%                                                   | 2.64 (-0.52, 4.82) | -0.06 (-1.60, 1.50) | 0.050    | 1.33 (0.10, 2.56)   | 0.03 (-0.97, 1.04)  | 0.096    | 1.82 (0.55, 3.10)   | 0.00 (-0.96, 0.97)  | <b>0.037</b> |
| PIR≥130%                                                   | 0.36 (-0.59, 1.31) | 0.64 (-0.03, 1.33)  | 0.646    | 0.28 (-0.81, 1.40)  | 1.31 (0.55, 2.08)   | 0.900    | 0.30 (-0.50, 1.10)  | 0.95 (0.34, 1.56)   | 0.844        |
| <b>Percentage change (95% CI) in obesity prevalence</b>    |                    |                     |          |                     |                     |          |                     |                     |              |
| Overall                                                    | 1.93 (0.10, 3.76)  | 2.29 (0.54, 4.02)   | 0.589    | 1.15 (-0.39, 2.76)  | 1.71 (0.56, 2.84)   | 0.699    | 1.51 (0.24, 2.81)   | 1.99 (0.93, 3.04)   | 0.689        |
| PIR<130%                                                   | 3.16 (0.12, 6.19)  | 2.38 (-0.48, 5.25)  | 0.378    | 2.38 (0.34, 4.46)   | 0.95 (-0.77, 2.67)  | 0.192    | 2.56 (0.81, 4.31)   | 1.47 (0.00, 2.95)   | 0.223        |
| PIR≥130%                                                   | 1.93 (-0.03, 3.85) | 2.08 (-0.38, 3.77)  | 0.536    | 0.97 (-1.00, 3.00)  | 2.21 (0.62, 3.78)   | 0.796    | 0.40 (-1.11, 1.93)  | 2.97 (1.75, 4.20)   | 0.985        |

Abbreviations: BMI, body mass index; CI, confidence interval; PIR poverty income ratio.

\* p-value for difference in annual changes for 2004-2010 versus 2011-2018.

Graphical representations of the changes in the distribution of mean BMI and overweight and obesity prevalence are shown in Figure 1 and Figure 2. Figure 1 shows the changes in mean BMI across years stratified by age, PIR, education, and race. Similar trends in mean BMI were found across subgroups of age, PIR, education, race, sex, and physical activity status. Overall, the mean BMI generally increased over time among all participants. In the age subgroup, the lowest mean BMI was found in those aged 20–30 years, followed by those aged > 70 years (Table S2, Figure 1). Compared to good economic conditions, BMI was higher for those with poor economic conditions since 2005-2006. In 2017-2018, participants with poor economic conditions had a mean BMI 1.68 kg/m<sup>2</sup> lower than those with good economic conditions. Between 2003-2004 and 2017-2018, a lower mean BMI was found among participants with a higher educational level than among those with a lower educational level. A similar trend was found in the subgroup stratified by race. In 2017-2018, the mean (SE) BMI for all participants was 29.86 ± 0.26 kg/m<sup>2</sup>, with the highest mean BMI in non-Hispanic Blacks (31.29 ± 0.29 kg/m<sup>2</sup>) and the lowest BMI in other racial populations (28.21 ± 0.39 kg/m<sup>2</sup>) (Table 1, Figure 1). Figure 2 shows the changes in mean BMI across years stratified by sex and activity status. Changes in overweight and obesity prevalence across years stratified by sex are also shown in Figure 2. From 2003-2004 to 2017-2018, the mean BMI increased similarly in both sexes, by approximately 1.61 kg/m<sup>2</sup> for males and 1.64 kg/m<sup>2</sup> for females (Table S2, Figure 2). Meanwhile, males had a lower BMI than females. In the physical activity status subgroup, there was a more complex pattern, with a decrease in mean BMI in 2011-2012 among those who were inactive and insufficiently active. Although there was an acceleration in the increase of mean BMI among those who were sufficiently active, their mean BMI was the lowest.

The trends in increasing obesity prevalence over time were largely consistent for males and



1  
2  
3  
4 females. In 2003-2004, males had a lower mean BMI and a lower prevalence of obesity than females,  
5  
6 but the opposite pattern was seen in 2017-2018. In 2017-2018, males had a higher prevalence of  
7  
8 obesity than females (43.3%, 95% CI: 38.2%-48.4% vs. 42.3%, 38.6%-46.0%) (Table S3, Figure 2).  
9  
10

11 The trends in increasing overweight prevalence over time were similar for both sexes. Overall, the  
12  
13 overweight prevalence in males was higher than that in females. Between 2003-2004 and 2017-2018,  
14  
15 the overweight (including obesity) increased similarly in both sexes, by approximately 1.61 kg/m<sup>2</sup> for  
16  
17 males and 1.64 kg/m<sup>2</sup> for females. For overweight (including obesity) prevalence trends, there was an  
18  
19 increasing prevalence among males from 70.6% (95% CI: 68.0%-73.0%) in 2003-2004 to 77.4%  
20  
21 (95%CI: 73.9%-80.9%) in 2017-2018, and among females from 62.5% (95% CI: 59.9%-65.9%) to  
22  
23 70.5% (95% CI: 67.3%-73.6%) (Table S4, Figure 2).  
24  
25  
26  
27  
28  
29

#### 30 **4.Discussion**

31  
32 Our present study showed that the prevalence of obesity among American adults increased from  
33  
34 32.3% in 2003-2004 to 42.8% in 2017-2018. These results are broadly consistent with the results  
35  
36 reported by the NCHS. In 2017-2018, the prevalence of obesity was 42.3% among males and 43.3%  
37  
38 among females. Compared with 2003-2004, the mean BMI increased by 1.94 kg/m<sup>2</sup>, obesity prevalence  
39  
40 increased by 15%, and overweight prevalence increased by 8% in 2017-2018 after adjusting for age,  
41  
42 sex, race, education, PIR, and physical activity status. The increases in mean BMI and the prevalence  
43  
44 of both overweight and obesity were somewhat larger after 2009-2010 than before 2009-2010.  
45  
46  
47  
48  
49 However, the difference was not statistically significant.  
50  
51

52  
53 The levels and changes in trends of mean BMI and obesity prevalence among American adults  
54  
55 have been covered by numerous studies [9, 15, 27-29]. The NCHS reported that the age-adjusted  
56  
57 obesity prevalence among adults was 42.4% in 2017-2018, and obesity prevalence increased among  
58  
59  
60

1  
2  
3  
4 adults from 1999-2000 through 2017-2018 [15]. Another study using data from the 2005–2014  
5  
6 NHANES also showed that a statistically significant positive linear trend in obesity prevalence was  
7  
8 present in females but not in males [28]. One recent study suggested that the prevalence of obesity  
9  
10 among US adults increased from 35.4% in 2011-2012 to 43.4% in 2017-2018. From 2011-2012  
11  
12 through 2017-2018, the mean BMI increased from 28.7 kg/m<sup>2</sup> to 29.8 kg/m<sup>2</sup> [29]. Our results were  
13  
14 broadly consistent with the results of the above studies at each timepoint. However, our present study  
15  
16 used a larger sample size as well as a longer time span than the above studies.  
17  
18  
19  
20  
21

22 To the best of our knowledge, few studies have assessed annual changes in BMI and obesity  
23  
24 prevalence and the potential effects of the 2008–2009 global financial crisis among US adults. A  
25  
26 previous study conducted using NHANES data from 1999–2008 showed that the increases in the  
27  
28 prevalence of obesity do not appear to be continuing at the same rate from 1999-2000 through 2007-  
29  
30 2008. When they adjusted for age and race with survey period as a categorical variable, there were no  
31  
32 significant differences in the prevalence of obesity between 2003-2004 and 2007-2008 for males [27].  
33  
34 This is broadly consistent with our findings. In our study, statistically significant differences in mean  
35  
36 BMI and obesity prevalence for both sexes were found since 2009-2010 (Table 2). Furthermore, a  
37  
38 previous study evaluated the effects of the economic crisis on dietary quality and obesity rates [30].  
39  
40 They found that economic changes can modify diet quality and increase the risk of having a poor diet  
41  
42 or being obese, which was mainly due to the changes in economic and work conditions. In our study,  
43  
44 the impact of economic conditions on BMI was complex. A significant increase in mean BMI was  
45  
46 found among both the poor and the rich. The overall BMI was higher for those with poor economic  
47  
48 conditions since 2005-2006 than for those with good economic conditions (Figure 1). However, the  
49  
50 acceleration in the increase of obesity prevalence was mainly due to an increase in the prevalence of  
51  
52  
53  
54  
55  
56  
57  
58  
59  
60

1  
2  
3  
4 obesity among those who are in a better economic status (Table 3). Interestingly, there was no  
5  
6 significant difference in the annual change in obesity prevalence before and after the financial crisis.  
7  
8  
9 This may be mainly due to the increase in the proportion of the poor after the financial crisis. The  
10  
11 proportion of the poor increased from 21.68% in 2009-2010 to 24.6% in 2011-2012. This trend  
12  
13 continued until 2015. In our present study, although the differences were not statistically significant,  
14  
15 numerical larger increases in mean BMI and the prevalence of both overweight and obesity were found  
16  
17 after 2009-2010 than before 2009-2010.  
18  
19  
20  
21

22 Interestingly, participants in the highest daily total energy intake tertile had the lowest BMIs  
23  
24 compared with those in the lowest daily total energy intake tertile (28.97 kg/m<sup>2</sup> vs. 29.30 kg/m<sup>2</sup>). The  
25  
26 findings were similar for the prevalence of obesity (36.7% vs. 39.9%) and overweight ( 69.8% vs.  
27  
28 70.9%). Thus, we analysed the characteristics of the participants according to tertiles of daily total  
29  
30 energy intake (Table S8). Compared with those in the lowest daily total energy intake tertile,  
31  
32 participants in the highest daily total energy intake tertile had higher proportions of non-Hispanic  
33  
34 Whites and individuals who were college educated (college degree or higher), sufficiently physically  
35  
36 active, and had good economic status. This might in part be related to the lower BMI and prevalence of  
37  
38 obesity.  
39  
40  
41  
42  
43  
44

45 In addition, although the mean BMI and the prevalence of overweight and obesity increased over  
46  
47 time, the mean daily total energy intake decreased from 2003-2004 to 2017-2018 ( $2,113.90 \pm 7.96$   
48  
49 Kcal/d vs.  $1,980.34 \pm 7.96$  Kcal/d,  $p < 0.001$ ). Several mechanisms may explain this phenomenon: (1)  
50  
51 The reduction in energy intake may lead to hunger increases and energy expenditure declines, leading  
52  
53 to physiological adaptations that tend to push body weight back up [31] ; and (2) In the US,  
54  
55 carbohydrate intake has increased markedly, resulting in major increases in the proportion of calories  
56  
57  
58  
59  
60

1  
2  
3  
4 from carbohydrates [32]. A high-carbohydrate diet could produce postprandial hyperinsulinaemia,  
5  
6 which promotes energy storage and causes an increase in body weight [33].  
7

8  
9 In our study, a lower mean BMI was found among participants with a higher educational level  
10  
11 than among those with a lower educational level. A previous study showed that a higher educational  
12  
13 level is related to a lower BMI level among middle-aged females, mainly on account of selection [34].  
14  
15 Theories of selection note that low-BMI children tend to have higher grades and test scores, and better  
16  
17 chances of completing secondary and tertiary education. It has also been reported that young  
18  
19 overweight or obese females are more likely to have a lower educational level [34]. This might be  
20  
21 explained by the following reasons: (1) Children with a lower BMI tend to come from  
22  
23 socioeconomically advantaged families, and have better chances of completing their studies [34]; (2)  
24  
25 Children with a lower BMI may benefit from physical activity, which may have a positive influence on  
26  
27 academic performance [35]; and (3) Negative views on high-BMI children may impair their academic  
28  
29 performance [36]. Our results also show that females had a higher prevalence of obesity than males.  
30  
31 This may be due to oestrogen-reducing postprandial fatty acid oxidation, leading to an increase in body  
32  
33 fat among females.[37] Meanwhile, it was less likely for females to be physically active than for males.  
34  
35  
36  
37  
38  
39  
40  
41  
42

43 In our study, approximately 67.4% of participants reported meeting physical activity guidelines in  
44  
45 2017-2018. As reported by the NCHS, 53.3% of adults aged  $\geq 18$  years met the 2018 Physical Activity  
46  
47 Guidelines for Americans for aerobic physical activity. However, the NCHS estimates were limited to  
48  
49 leisure-time physical activity only. Our estimates were based on the Global Physical Activity  
50  
51 Questionnaire, including both daily activities (work activities) and leisure time activities. For this  
52  
53  
54  
55  
56 reason, our estimates were larger than those reported by NCHS reports.  
57

58 Although NHANES is designed to provide nationally representative estimates, it is a repeated  
59  
60

1  
2  
3  
4 cross-sectional survey, which precludes within-individual change in BMI or obesity. Meanwhile,  
5  
6 obesity was defined mainly based on measurements of BMI, which does not measure body fat directly.  
7  
8  
9 Although BMI is highly correlated with overall body fat [38], the relationship between BMI and body  
10  
11 fat varies by sex, age, and race-ethnicity [39]. In addition, the study used a large nationally  
12  
13 representative sample of adults from the US. Thus, our results are only generalizable to the US  
14  
15 population. Therefore, there are certain limitations in the extrapolation of the study results.  
16  
17  
18

19 The COVID-19 global pandemic has changed the lifestyle of most Americans. It has been  
20  
21 reported that approaches designed to contain the spread of COVID-19, such as lockdowns, might  
22  
23 exacerbate the prevalence of obesity [40]. The effects of the COVID-19 global pandemic on BMI and  
24  
25 the prevalence of obesity have yet to be examined. Regrettably, information about anthropometric  
26  
27 measurements in NHANES after 2018 has not been released. Additional follow-up studies are required  
28  
29 to answer these questions.  
30  
31  
32  
33

## 34 35 **5. Conclusions**

36  
37 Although the prevalence of adult obesity continues to rise, there have been no significant changes  
38  
39 in the annual growth of adult obesity prevalence between 2003-2004 and 2017-2018. In 2017-2018, the  
40  
41 prevalence of obesity was 42.8%, which equates to 76 million Americans at risk for serious and costly  
42  
43 chronic conditions. The prevalence of obesity was higher among older adults (aged 60-69 years),  
44  
45 females, non-Hispanic Blacks, and participants who did not graduate college, were physically inactive,  
46  
47 reported lower daily total energy intake, and had poor economic status.  
48  
49  
50  
51

## 52 53 **Author contributions:**

54  
55 WG, ZL: designed the research; ZL and ML: analyzed the data; ZL: wrote the paper; ZL: had full  
56  
57 access to all the data in the study and takes responsibility for the integrity of the data and the accuracy  
58  
59  
60

1  
2  
3  
4 of the data analysis; WG, ZL, ML, and SW: assisted with interpretation of the results and critically  
5  
6 reviewed the manuscript; and all authors: read and approved the final manuscript. The authors report no  
7  
8 conflicts of interest.  
9

#### 10 11 **Acknowledgements**

12  
13  
14 None.  
15

#### 16 17 **Funding sources**

18  
19 This research received no specific grant from any funding agency in the public, commercial or  
20  
21 not-for-profit sectors.  
22  
23

#### 24 25 **Competing interests statement**

26  
27 None.  
28

#### 29 30 **Data sharing statement**

31  
32 Data described in the article are publicly and freely available without restriction at  
33  
34 <https://www.cdc.gov/nchs/nhanes/index.htm>.  
35  
36

#### 37 38 **Ethics approval**

39  
40 Approval was obtained from the National Center for Health Statistics Research Ethics Review  
41  
42 Board, and all participants provided written informed consent (Approval number: Protocol#98-12,  
43  
44 #2005-06, #11-17, #18-01, <https://www.cdc.gov/nchs/nhanes/irba98.htm>).  
45  
46  
47  
48  
49  
50  
51  
52  
53  
54  
55  
56  
57  
58  
59  
60

## Reference

1. Poirier P, Giles TD, Bray GA, Hong Y, Stern JS, Pi-Sunyer FX, Eckel RH: **Obesity and cardiovascular disease: pathophysiology, evaluation, and effect of weight loss: an update of the 1997 American Heart Association Scientific Statement on Obesity and Heart Disease from the Obesity Committee of the Council on Nutrition, Physical Activity, and Metabolism.** *Circulation* 2006, **113**:898-918.
2. Petrelli F, Cortellini A, Indini A, Tomasello G, Ghidini M, Nigro O, Salati M, Dottorini L, Iaculli A, Varricchio A, et al: **Association of Obesity With Survival Outcomes in Patients With Cancer: A Systematic Review and Meta-analysis.** *JAMA Netw Open* 2021, **4**:e213520.
3. Islami F, Goding Sauer A, Gapstur SM, Jemal A: **Proportion of Cancer Cases Attributable to Excess Body Weight by US State, 2011-2015.** *JAMA Oncol* 2019, **5**:384-392.
4. Piché ME, Tchernof A, Després JP: **Obesity Phenotypes, Diabetes, and Cardiovascular Diseases.** *Circ Res* 2020, **126**:1477-1500.
5. Emerging Risk Factors C, Wormser D, Kaptoge S, Di Angelantonio E, Wood AM, Pennells L, Thompson A, Sarwar N, Kizer JR, Lawlor DA, et al: **Separate and combined associations of body-mass index and abdominal adiposity with cardiovascular disease: collaborative analysis of 58 prospective studies.** *Lancet* 2011, **377**:1085-1095.
6. Bardou M, Barkun AN, Martel M: **Obesity and colorectal cancer.** *Gut* 2013, **62**:933-947.
7. Collaboration NCDRF: **Worldwide trends in body-mass index, underweight, overweight, and obesity from 1975 to 2016: a pooled analysis of 2416 population-based measurement studies in 128.9 million children, adolescents, and adults.** *Lancet* 2017, **390**:2627-2642.
8. Hales CM, Fryar CD, Carroll MD, Freedman DS, Ogden CL: **Trends in Obesity and Severe Obesity Prevalence in US Youth and Adults by Sex and Age, 2007-2008 to 2015-2016.** *Jama* 2018, **319**:1723-1725.
9. Ward ZJ, Bleich SN, Cradock AL, Barrett JL, Giles CM, Flax C, Long MW, Gortmaker SL: **Projected U.S. State-Level Prevalence of Adult Obesity and Severe Obesity.** *N Engl J Med* 2019, **381**:2440-2450.
10. Flegal KM, Carroll MD, Kuczmarski RJ, Johnson CL: **Overweight and obesity in the United States: prevalence and trends, 1960-1994.** *Int J Obes Relat Metab Disord* 1998, **22**:39-47.
11. Flegal KM, Carroll MD, Ogden CL, Johnson CL: **Prevalence and trends in obesity among US adults, 1999-2000.** *Jama* 2002, **288**:1723-1727.
12. Flegal KM, Carroll MD, Kit BK, Ogden CL: **Prevalence of obesity and trends in the distribution of body mass index among US adults, 1999-2010.** *Jama* 2012, **307**:491-497.
13. Ogden CL, Carroll MD, Kit BK, Flegal KM: **Prevalence of childhood and adult obesity in the United States, 2011-2012.** *Jama* 2014, **311**:806-814.
14. Ogden CL, Fryar CD, Martin CB, Freedman DS, Carroll MD, Gu Q, Hales CM: **Trends in Obesity Prevalence by Race and Hispanic Origin-1999-2000 to 2017-2018.** *Jama* 2020, **324**:1208-1210.
15. Hales CM, Carroll MD, Fryar CD, Ogden CL: **Prevalence of Obesity and Severe Obesity Among Adults: United States, 2017-2018.** *NCHS Data Brief* 2020:1-8.
16. Ellison-Barnes A, Johnson S, Gudzone K: **Trends in Obesity Prevalence Among Adults Aged 18 Through 25 Years, 1976-2018.** *Jama* 2021, **326**:2073-2074.

- 1
  - 2
  - 3
  - 4
  - 5
  - 6
  - 7
  - 8
  - 9
  - 10
  - 11
  - 12
  - 13
  - 14
  - 15
  - 16
  - 17
  - 18
  - 19
  - 20
  - 21
  - 22
  - 23
  - 24
  - 25
  - 26
  - 27
  - 28
  - 29
  - 30
  - 31
  - 32
  - 33
  - 34
  - 35
  - 36
  - 37
  - 38
  - 39
  - 40
  - 41
  - 42
  - 43
  - 44
  - 45
  - 46
  - 47
  - 48
  - 49
  - 50
  - 51
  - 52
  - 53
  - 54
  - 55
  - 56
  - 57
  - 58
  - 59
  - 60
17. Baskin ML, Ard J, Franklin F, Allison DB: **Prevalence of obesity in the United States.** *Obes Rev* 2005, **6**:5-7.
18. Ogden CL, Carroll MD, Kit BK, Flegal KM: **Prevalence of obesity in the United States, 2009-2010.** *NCHS Data Brief* 2012:1-8.
19. Kwak YE, McMillan R, McDonald EKT: **Trends in Overweight and Obesity Self-awareness Among Adults With Overweight or Obesity in the United States, 1999 to 2016.** *Ann Intern Med* 2021, **174**:721-723.
20. Zipf G, Chiappa M, Porter KS, Ostchega Y, Lewis BG, Dostal J: **National health and nutrition examination survey: plan and operations, 1999-2010.** *Vital Health Stat 1* 2013:1-37.
21. Johnson CL, Paulose-Ram R, Ogden CL, Carroll MD, Kruszon-Moran D, Dohrmann SM, Curtin LR: **National health and nutrition examination survey: analytic guidelines, 1999-2010.** *Vital Health Stat 2* 2013:1-24.
22. Fadeyev K, Nagao-Sato S, Reicks M: **Nutrient and Food Group Intakes among U.S. Children (2-5 Years) Differ by Family Income to Poverty Ratio, NHANES 2011-2018.** *Int J Environ Res Public Health* 2021, **18**.
23. Piercy KL, Troiano RP, Ballard RM, Carlson SA, Fulton JE, Galuska DA, George SM, Olson RD: **The Physical Activity Guidelines for Americans.** *JAMA* 2018, **320**:2020-2028.
24. Kim D, Konyn P, Cholankeril G, Ahmed A: **Physical Activity Is Associated With Nonalcoholic Fatty Liver Disease and Significant Fibrosis Measured by FibroScan.** *Clin Gastroenterol Hepatol* 2021.
25. Wang L, Zhou B, Zhao Z, Yang L, Zhang M, Jiang Y, Li Y, Zhou M, Wang L, Huang Z, et al: **Body-mass index and obesity in urban and rural China: findings from consecutive nationally representative surveys during 2004-18.** *Lancet* 2021, **398**:53-63.
26. Curtin LR, Mohadjer LK, Dohrmann SM, Montaquila JM, Kruszon-Moran D, Mirel LB, Carroll MD, Hirsch R, Schober S, Johnson CL: **The National Health and Nutrition Examination Survey: Sample Design, 1999-2006.** *Vital Health Stat 2* 2012:1-39.
27. Flegal KM, Carroll MD, Ogden CL, Curtin LR: **Prevalence and trends in obesity among US adults, 1999-2008.** *JAMA* 2010, **303**:235-241.
28. Flegal KM, Kruszon-Moran D, Carroll MD, Fryar CD, Ogden CL: **Trends in Obesity Among Adults in the United States, 2005 to 2014.** *JAMA* 2016, **315**:2284-2291.
29. Liu B, Du Y, Wu Y, Snetelaar LG, Wallace RB, Bao W: **Trends in obesity and adiposity measures by race or ethnicity among adults in the United States 2011-18: population based study.** *BMJ* 2021, **372**:n365.
30. Norte A, Sospedra I, Ortiz-Moncada R: **Influence of economic crisis on dietary quality and obesity rates.** *Int J Food Sci Nutr* 2019, **70**:232-239.
31. Leibel RL, Rosenbaum M, Hirsch J: **Changes in energy expenditure resulting from altered body weight.** *N Engl J Med* 1995, **332**:621-628.
32. Ford ES, Dietz WH: **Trends in energy intake among adults in the United States: findings from NHANES.** *Am J Clin Nutr* 2013, **97**:848-853.
33. Ludwig DS, Ebbeling CB: **The Carbohydrate-Insulin Model of Obesity: Beyond "Calories In, Calories Out".** *JAMA Intern Med* 2018, **178**:1098-1103.
34. Benson R, von Hippel PT, Lynch JL: **Does more education cause lower BMI, or do lower-BMI individuals become more educated? Evidence from the National Longitudinal Survey of Youth 1979.** *Soc Sci Med* 2018, **211**:370-377.



- 1  
2  
3  
4  
5  
6  
7  
8  
9  
10  
11  
12  
13  
14  
15  
16  
17  
18  
19  
20  
21  
22  
23  
24  
25
35. Castelli DM, Hillman CH, Buck SM, Erwin HE: **Physical fitness and academic achievement in third- and fifth-grade students.** *J Sport Exerc Psychol* 2007, **29**:239-252.
  36. Crosnoe R: **Gender, Obesity, and Education.** *Sociology of Education* 2007, **80**:241-260.
  37. O'Sullivan AJ: **Does oestrogen allow women to store fat more efficiently? A biological advantage for fertility and gestation.** *Obes Rev* 2009, **10**:168-177.
  38. Flegal KM, Shepherd JA, Looker AC, Graubard BI, Borrud LG, Ogden CL, Harris TB, Everhart JE, Schenker N: **Comparisons of percentage body fat, body mass index, waist circumference, and waist-stature ratio in adults.** *Am J Clin Nutr* 2009, **89**:500-508.
  39. Gallagher D, Visser M, Sepúlveda D, Pierson RN, Harris T, Heymsfield SB: **How useful is body mass index for comparison of body fatness across age, sex, and ethnic groups?** *Am J Epidemiol* 1996, **143**:228-239.
  40. Clemmensen C, Petersen MB, Sorensen TIA: **Will the COVID-19 pandemic worsen the obesity epidemic?** *Nat Rev Endocrinol* 2020, **16**:469-470.

26  
27  
28  
29  
30  
31  
32  
33  
34  
35  
36  
37  
38  
39  
40  
41  
42  
43  
44  
45  
46  
47  
48  
49  
50  
51  
52  
53  
54  
55  
56  
57  
58  
59  
60

#### Figure legends

Figure1 Mean BMI by age (A), poverty income ratio (B), education (C) and race (D) group from 2003 through 2018.

Figure2 Mean BMI by sex (A), physical activity status (B) group and prevalence of overweight (C) and obesity (D) from 2003 through 2018.

### BMJ Open

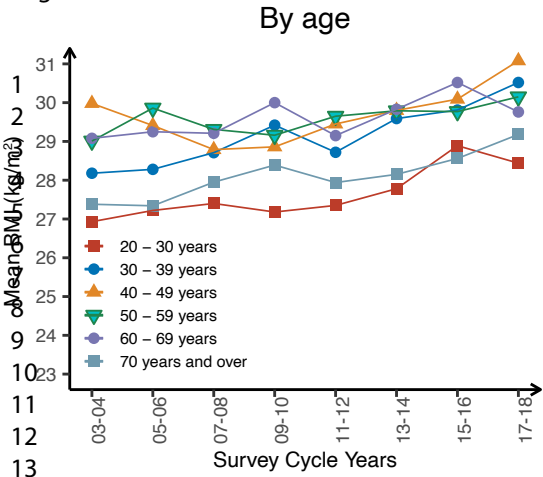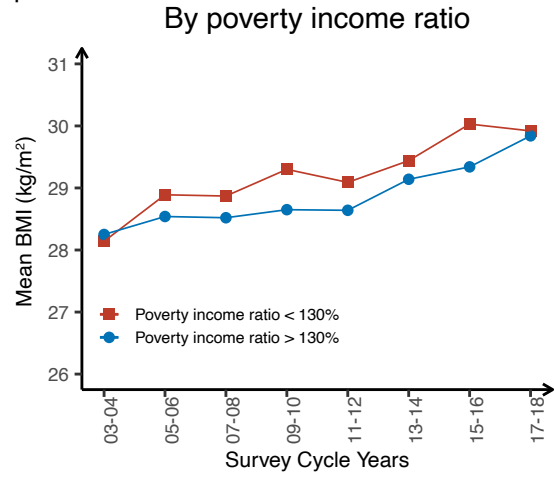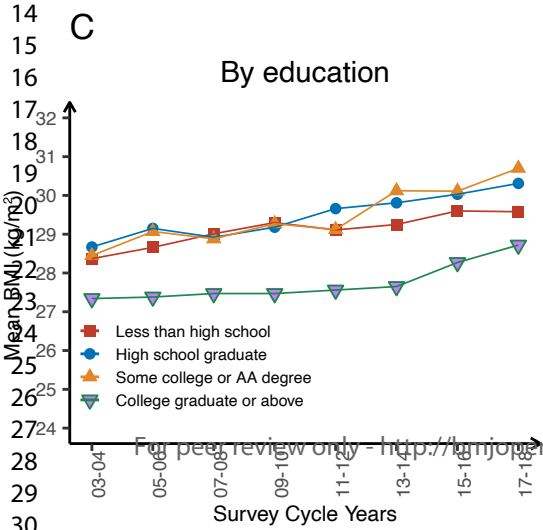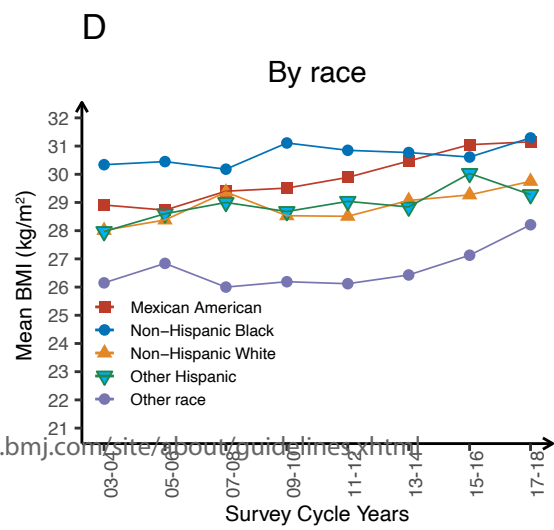

## A Mean BMI

By sex

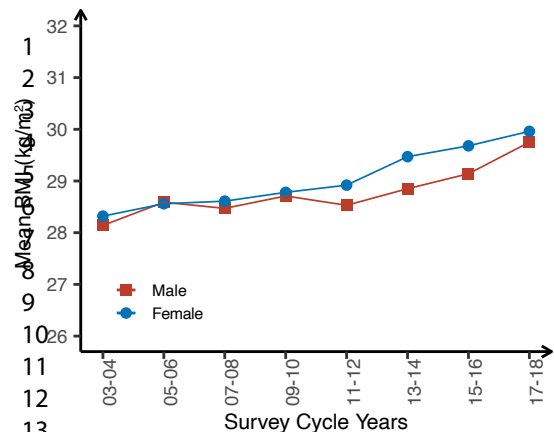

BMJ Open

## B Mean BMI

By physical activity status

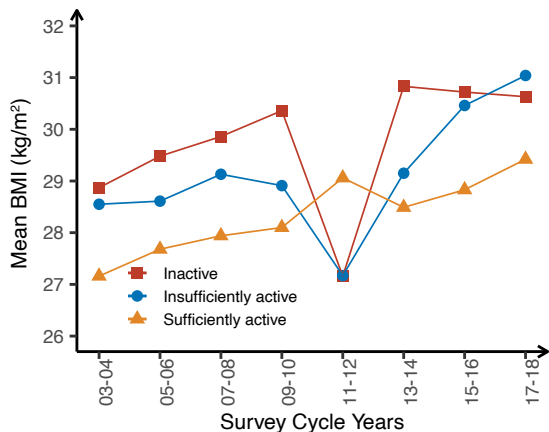

## C Overweight

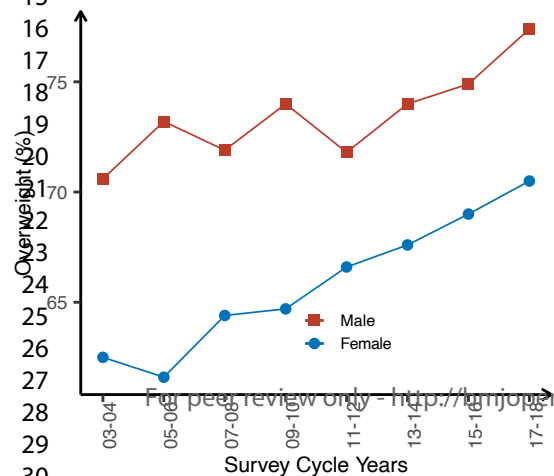

## D Obesity

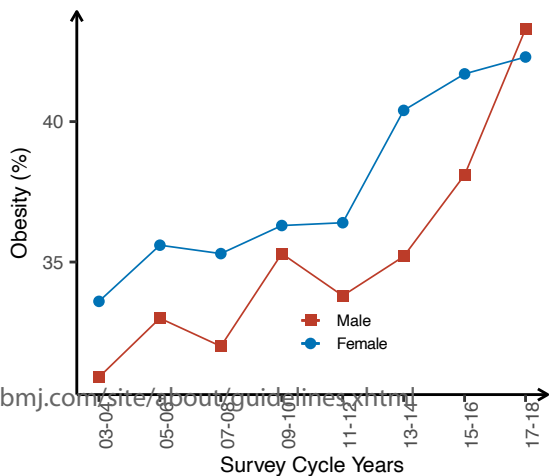

## Supplementary material

**TITLE: Trends in body mass index, overweight and obesity among adults in the United States, the NHANES from 2003 through 2018: a repeat cross-sectional survey**

### AUTHORS:

1. Mingxi Li<sup>1&</sup> 2. Weijun Gong<sup>1&</sup> 3. Shidong Wang<sup>2</sup> 4. Zhe Li<sup>2</sup>

### AFFILIATIONS:

1. Beijing Rehabilitation Hospital, Capital Medical University, Xixiazhuang Badachu Road, Shijingshan District, 100144, Beijing, China

2. Dongzhimen Hospital, Beijing University of Chinese Medicine, No.5 Haiyuncang, Dongcheng District, 100700, Beijing, China

&These authors contributed equally to this work and should be considered co-first authors

**CONTACT INFO:** Corresponding Author: Zhe Li; Mailing address: No.5 Haiyuncang, Dongcheng District, 100700, Beijing, China; e-mail address: lizhetcm@126.com

For the annual change in mean BMI and annual relative change in the prevalence of obesity and overweight, the calculation formulas were as follows:

- Annual change in mean BMI (kg/m<sup>2</sup>):

$$\text{annual change} = \frac{(\text{level}_{t2} - \text{level}_{t1})}{(t2 - t1)} \frac{(\text{level}_{t2} - \text{level}_{t1})}{(t2 - t1)}$$

- Annual relative change in the prevalence of overweight and obesity:

$$\text{annual change} = \left( \frac{\text{level}_{t2}}{\text{level}_{t1}} \right)^{\frac{1}{t2 - t1}} - 1$$

**Table S1. Characteristics of participants according to BMI groups\***

| Characteristic              | Total<br>(n=42,266) | BMI, kg/m <sup>2</sup> † |                         |                    | p-value |
|-----------------------------|---------------------|--------------------------|-------------------------|--------------------|---------|
|                             |                     | < 25<br>(n=12,522)       | 25.0-29.9<br>(n=14,046) | ≥ 30<br>(n=1,5698) |         |
| Age, years                  | 47.11 ± 0.20        | 44.29 ± 0.30             | 48.78 ± 0.24            | 47.99 ± 0.22       | < 0.001 |
| Age, years, n (%)           |                     |                          |                         |                    | <0.001  |
| 20 - 30                     | 8,033 (20.54)       | 3,396 (29.24)            | 2,180 (16.73)           | 2,457 (16.63)      |         |
| 30 - 39                     | 7,175 (18.37)       | 2,104 (18.37)            | 2,334 (18.12)           | 2,737 (18.61)      |         |
| 40 - 49                     | 7,035 (19.43)       | 1,772 (16.64)            | 2,408 (20.50)           | 2,855 (20.84)      |         |
| 50 - 59                     | 6,714 (18.11)       | 1,675 (15.60)            | 2,224 (18.28)           | 2,815 (20.08)      |         |
| 60 - 69                     | 6,629 (12.76)       | 1,521 (9.62)             | 2,340 (13.84)           | 2,768 (14.43)      |         |
| ≥ 70                        | 6,680 (10.78)       | 2,054 (10.54)            | 2,560 (12.53)           | 2,066 (9.41)       |         |
| Sex, n (%)                  |                     |                          |                         |                    | < 0.001 |
| Male, n (%)                 | 20,408 (47.97)      | 5,784 (41.87)            | 7,773 (55.66)           | 6,851 (46.17)      |         |
| Female, n (%)               | 21,858 (52.03)      | 6,738 (58.13)            | 6,273 (44.34)           | 8,847 (53.83)      |         |
| Race, n (%)                 |                     |                          |                         |                    | < 0.001 |
| Mexican American            | 6,805 (8.38)        | 1,355 (5.61)             | 2,581 (9.35)            | 2,869 (9.86)       |         |
| Other Hispanic              | 3,755 (5.33)        | 917 (4.51)               | 1,412 (6.04)            | 1,426 (5.38)       |         |
| Non-Hispanic White          | 18,120 (67.36)      | 5,735 (69.30)            | 6,070 (67.90)           | 6,315 (65.24)      |         |
| Non-Hispanic Black          | 9,094 (11.41)       | 2,268 (9.24)             | 2,624 (9.82)            | 4,202 (14.70)      |         |
| Other Race                  | 4,492 (7.51)        | 2,247 (11.35)            | 1,359 (6.89)            | 886 (4.82)         |         |
| Education, n (%)            |                     |                          |                         |                    | < 0.001 |
| Less than high school       | 10,814 (16.4)       | 2,899 (15.19)            | 3,779 (16.79)           | 4,136 (16.95)      |         |
| High school graduate        | 9,787 (23.6)        | 2,747 (21.39)            | 3,200 (23.25)           | 3,840 (25.84)      |         |
| Some college or AA degree   | 12,266 (31.4)       | 3,409 (29.03)            | 3,860 (29.85)           | 4,997 (34.71)      |         |
| College graduate or above   | 9,345 (28.6)        | 3,441 (34.26)            | 3,194 (30.06)           | 2,710 (22.43)      |         |
| Poverty income ratio, n (%) |                     |                          |                         |                    | < 0.001 |
| < 130%                      | 12,129 (21.29)      | 3,588 (21.83)            | 3,802 (19.69)           | 4,739 (22.28)      |         |
| ≥ 130%                      | 26,450 (78.71)      | 7,863 (78.17)            | 8,944 (80.31)           | 9,643 (77.72)      |         |
| BMI, kg/m <sup>2</sup>      | 28.93 ± 0.07        | 22.20 ± 0.02             | 27.44 ± 0.02            | 35.98 ± 0.07       |         |
| Total energy intake, Kcal/d | 2,027.31 ± 7.96     | 2051.4 ± 12.7            | 2049.5 ± 12.8           | 1988.0 ± 11.1      | < 0.001 |
| Total energy intake, n (%)  |                     |                          |                         |                    | < 0.001 |
| Tertile1                    | 9,991 (25.36)       | 2,614 (24.87)            | 3,245 (23.89)           | 4,132 (27.06)      |         |
| Tertile2                    | 8,990 (27.08)       | 2,609 (26.89)            | 3,080 (28.30)           | 3,301 (26.16)      |         |
| Tertile3                    | 15,644 (47.56)      | 4,673 (48.24)            | 5,180 (47.81)           | 5,791 (46.79)      |         |
| Physical activity, n (%)    |                     |                          |                         |                    | < 0.001 |
| Inactive                    | 8,504 (18.09)       | 2,138 (14.52)            | 2,744 (16.99)           | 3,622 (22.15)      |         |
| Insufficiently active       | 6,649 (17.52)       | 1,995 (17.40)            | 2,232 (17.63)           | 2,422 (17.51)      |         |
| Sufficiently active         | 23,320 (64.39)      | 7,295 (68.09)            | 7,761 (65.38)           | 8,264 (60.34)      |         |

\* Data are presented incorporating sample weights and adjusted for clusters and strata of the complex sample design of the National Health and Nutrition Examination

1  
2  
3  
4 Survey (2003-2018).  
5

6 † Values are presented as mean  $\pm$  SE for continuous variables and unweighted  
7  
8  
9 numbers (weighted %) for categorical variables.  
10

11 Abbreviations: AA, Associate of Arts; BMI, body mass index  
12  
13  
14  
15  
16  
17  
18  
19  
20  
21  
22  
23  
24  
25  
26  
27  
28  
29  
30  
31  
32  
33  
34  
35  
36  
37  
38  
39  
40  
41  
42  
43  
44  
45  
46  
47  
48  
49  
50  
51  
52  
53  
54  
55  
56  
57  
58  
59  
60

For peer review only

**Table S2. Mean BMI over time among adults in the United States, 2003-2018 \***

| Characteristics       | BMI (weighted mean ± SE), kg/m <sup>2</sup> |                          |                           |                           |                           |                           |                           |                           |                           |
|-----------------------|---------------------------------------------|--------------------------|---------------------------|---------------------------|---------------------------|---------------------------|---------------------------|---------------------------|---------------------------|
|                       | Total<br>(n= 42,266)                        | 2003/2004<br>(n = 4,647) | 2005/2006<br>(n = 4,680)  | 2007/2008<br>(n = 5,607)  | 2009/2010<br>(n = 5,994)  | 2011/2012<br>(n = 5,237)  | 2013/2014<br>(n = 5,520)  | 2015/2016<br>(n = 5,406)  | 2017/2018<br>(n = 5,175)  |
| Overall               | 28.93 ± 0.07                                | 28.24 ± 0.15             | 28.57 ± 0.23              | 28.54 ± 0.16              | 28.75 ± 0.13              | 28.73 ± 0.21              | 29.17 ± 0.17              | 29.42 ± 0.25              | 29.86 ± 0.26              |
| Age, years            |                                             |                          |                           |                           |                           |                           |                           |                           |                           |
| 20 - 30               | 27.54 ± 0.14                                | 26.93 ± 0.21             | 27.22 ± 0.34              | 27.40 ± 0.45              | 27.18 ± 0.30              | 27.35 ± 0.38 <sup>†</sup> | 27.78 ± 0.42 <sup>†</sup> | 28.89 ± 0.39 <sup>‡</sup> | 28.44 ± 0.55 <sup>‡</sup> |
| 30 - 39               | 29.16 ± 0.13                                | 28.18 ± 0.37             | 28.28 ± 0.36              | 28.71 ± 0.28              | 29.42 ± 0.32              | 28.72 ± 0.33              | 29.59 ± 0.35 <sup>†</sup> | 29.81 ± 0.31 <sup>‡</sup> | 30.52 ± 0.48 <sup>‡</sup> |
| 40 - 49               | 29.53 ± 0.13                                | 28.98 ± 0.28             | 29.41 ± 0.32              | 28.79 ± 0.27              | 28.86 ± 0.22              | 29.45 ± 0.35              | 29.80 ± 0.42              | 30.09 ± 0.52 <sup>†</sup> | 31.08 ± 0.36 <sup>‡</sup> |
| 50 - 59               | 29.61 ± 0.14                                | 29.01 ± 0.41             | 29.86 ± 0.43 <sup>†</sup> | 29.31 ± 0.42              | 29.16 ± 0.24              | 29.65 ± 0.51              | 29.79 ± 0.31 <sup>†</sup> | 29.77 ± 0.40              | 30.15 ± 0.32 <sup>‡</sup> |
| 60 - 69               | 29.66 ± 0.13                                | 29.08 ± 0.23             | 29.25 ± 0.29              | 29.21 ± 0.33              | 30.00 ± 0.29              | 29.15 ± 0.40              | 29.83 ± 0.32              | 30.52 ± 0.40 <sup>†</sup> | 29.76 ± 0.46              |
| ≥ 70                  | 28.16 ± 0.10                                | 27.38 ± 0.23             | 27.34 ± 0.25              | 27.95 ± 0.25 <sup>†</sup> | 28.39 ± 0.22 <sup>‡</sup> | 27.94 ± 0.31 <sup>‡</sup> | 28.15 ± 0.24 <sup>‡</sup> | 28.56 ± 0.35 <sup>‡</sup> | 29.18 ± 0.26 <sup>‡</sup> |
| Sex                   |                                             |                          |                           |                           |                           |                           |                           |                           |                           |
| Male                  | 28.79 ± 0.08                                | 28.14 ± 0.13             | 28.59 ± 0.25              | 28.47 ± 0.16              | 28.71 ± 0.21              | 28.53 ± 0.23              | 28.85 ± 0.15              | 29.14 ± 0.26 <sup>‡</sup> | 29.75 ± 0.27 <sup>‡</sup> |
| Female                | 29.07 ± 0.09                                | 28.32 ± 0.24             | 28.56 ± 0.28              | 28.61 ± 0.20              | 28.78 ± 0.14 <sup>†</sup> | 28.92 ± 0.23 <sup>‡</sup> | 29.47 ± 0.26 <sup>‡</sup> | 29.68 ± 0.29 <sup>‡</sup> | 29.96 ± 0.37 <sup>‡</sup> |
| Race                  |                                             |                          |                           |                           |                           |                           |                           |                           |                           |
| Mexican American      | 29.96 ± 0.13                                | 28.91 ± 0.39             | 28.73 ± 0.22              | 29.40 ± 0.31              | 29.51 ± 0.27              | 29.89 ± 0.38              | 30.47 ± 0.24 <sup>‡</sup> | 31.05 ± 0.33 <sup>‡</sup> | 31.15 ± 0.35 <sup>‡</sup> |
| Other Hispanic        | 29.05 ± 0.15                                | 27.97 ± 0.64             | 28.60 ± 0.51              | 29.00 ± 0.41              | 28.68 ± 0.41              | 29.04 ± 0.31 <sup>‡</sup> | 28.84 ± 0.50              | 30.03 ± 0.40 <sup>‡</sup> | 29.28 ± 0.33 <sup>‡</sup> |
| Non-Hispanic White    | 28.73 ± 0.09                                | 28.01 ± 0.18             | 28.38 ± 0.25              | 28.37 ± 0.26              | 28.53 ± 0.16 <sup>‡</sup> | 28.51 ± 0.28 <sup>‡</sup> | 29.07 ± 0.19 <sup>‡</sup> | 29.27 ± 0.26 <sup>‡</sup> | 29.75 ± 0.35 <sup>‡</sup> |
| Non-Hispanic Black    | 30.72 ± 0.11                                | 30.34 ± 0.31             | 30.45 ± 0.28              | 30.18 ± 0.30              | 31.11 ± 0.35              | 30.85 ± 0.28              | 30.77 ± 0.31              | 30.61 ± 0.34              | 31.29 ± 0.29 <sup>†</sup> |
| Other race            | 26.77 ± 0.16                                | 26.15 ± 0.52             | 26.84 ± 0.65              | 26.00 ± 0.55              | 26.19 ± 0.39              | 26.12 ± 0.41              | 26.43 ± 0.36              | 27.13 ± 0.42              | 28.21 ± 0.39 <sup>‡</sup> |
| Education             |                                             |                          |                           |                           |                           |                           |                           |                           |                           |
| Less than high school | 29.09 ± 0.09                                | 28.37 ± 0.32             | 28.66 ± 0.16              | 29.01 ± 0.25              | 29.30 ± 0.22 <sup>‡</sup> | 29.11 ± 0.28 <sup>‡</sup> | 29.25 ± 0.21 <sup>‡</sup> | 29.60 ± 0.29 <sup>‡</sup> | 29.58 ± 0.37 <sup>‡</sup> |
| High school graduate  | 29.47 ± 0.10                                | 28.67 ± 0.20             | 29.15 ± 0.27              | 28.92 ± 0.29              | 29.18 ± 0.20 <sup>†</sup> | 29.66 ± 0.37 <sup>†</sup> | 29.81 ± 0.33 <sup>‡</sup> | 30.03 ± 0.38 <sup>‡</sup> | 30.31 ± 0.18 <sup>‡</sup> |

1  
2  
3  
4  
5  
6  
7  
8  
9  
10  
11  
12  
13  
14  
15  
16  
17  
18  
19  
20  
21  
22  
23  
24  
25  
26  
27  
28  
29  
30  
31  
32  
33  
34  
35  
36  
37  
38  
39  
40  
41  
42  
43  
44  
45  
46

|                           |              |              |                           |                           |                           |                           |                           |                           |                           |  |
|---------------------------|--------------|--------------|---------------------------|---------------------------|---------------------------|---------------------------|---------------------------|---------------------------|---------------------------|--|
| Some college or AA degree | 29.51 ± 0.10 | 28.45 ± 0.22 | 29.07 ± 0.29              | 28.88 ± 0.25              | 29.27 ± 0.17 <sup>†</sup> | 29.12 ± 0.28 <sup>†</sup> | 30.12 ± 0.27 <sup>‡</sup> | 30.11 ± 0.33 <sup>‡</sup> | 30.70 ± 0.32 <sup>‡</sup> |  |
| College graduate or above | 27.78 ± 0.11 | 27.34 ± 0.33 | 27.38 ± 0.37              | 27.40 ± 0.28              | 27.47 ± 0.30              | 27.56 ± 0.34 <sup>†</sup> | 27.65 ± 0.20 <sup>†</sup> | 28.27 ± 0.26 <sup>‡</sup> | 28.72 ± 0.43 <sup>‡</sup> |  |
| Poverty income ratio      |              |              |                           |                           |                           |                           |                           |                           |                           |  |
| < 130%                    | 28.14 ± 0.22 | 28.14 ± 0.22 | 28.89 ± 0.31 <sup>†</sup> | 28.87 ± 0.28 <sup>†</sup> | 29.30 ± 0.34 <sup>‡</sup> | 29.09 ± 0.21 <sup>‡</sup> | 29.44 ± 0.21 <sup>‡</sup> | 30.03 ± 0.32 <sup>‡</sup> | 29.92 ± 0.39 <sup>‡</sup> |  |
| ≥ 130%                    | 28.25 ± 0.15 | 28.25 ± 0.15 | 28.54 ± 0.24              | 28.52 ± 0.16              | 28.65 ± 0.15 <sup>†</sup> | 28.64 ± 0.26 <sup>‡</sup> | 29.14 ± 0.23 <sup>‡</sup> | 29.34 ± 0.27 <sup>‡</sup> | 28.24 ± 0.15 <sup>‡</sup> |  |
| Physical activity         |              |              |                           |                           |                           |                           |                           |                           |                           |  |
| Inactive                  | 28.53 ± 0.09 | 28.87 ± 0.72 | 29.48 ± 0.82              | 29.86 ± 0.21              | 30.36 ± 0.21              | 27.16 ± 0.35 <sup>†</sup> | 30.83 ± 0.30 <sup>†</sup> | 30.72 ± 0.33 <sup>†</sup> | 30.63 ± 0.39 <sup>†</sup> |  |
| Insufficiently active     | 28.98 ± 0.12 | 28.55 ± 0.20 | 28.61 ± 0.28              | 29.13 ± 0.34              | 28.91 ± 0.21              | 27.17 ± 0.38 <sup>‡</sup> | 29.15 ± 0.32              | 30.46 ± 0.58 <sup>‡</sup> | 31.04 ± 0.42 <sup>‡</sup> |  |
| Sufficiently active       | 28.53 ± 0.09 | 27.16 ± 0.23 | 27.68 ± 0.27              | 27.94 ± 0.20 <sup>†</sup> | 28.10 ± 0.18 <sup>‡</sup> | 29.06 ± 0.22 <sup>‡</sup> | 28.49 ± 0.17 <sup>‡</sup> | 28.83 ± 0.25 <sup>‡</sup> | 29.42 ± 0.29 <sup>‡</sup> |  |
| Total energy intake       |              |              |                           |                           |                           |                           |                           |                           |                           |  |
| Tetile 1                  | 29.30 ± 0.11 | 28.51 ± 0.19 | 29.21 ± 0.30              | 28.66 ± 0.24              | 29.37 ± 0.25 <sup>‡</sup> | 29.04 ± 0.31 <sup>†</sup> | 29.58 ± 0.34 <sup>‡</sup> | 29.83 ± 0.33 <sup>‡</sup> | 29.91 ± 0.35 <sup>‡</sup> |  |
| Tetile 2                  | 28.95 ± 0.11 | 27.94 ± 0.22 | 28.78 ± 0.26 <sup>‡</sup> | 28.49 ± 0.27 <sup>‡</sup> | 28.81 ± 0.23 <sup>‡</sup> | 28.92 ± 0.23 <sup>‡</sup> | 29.25 ± 0.34 <sup>‡</sup> | 29.31 ± 0.34 <sup>‡</sup> | 29.98 ± 0.45 <sup>‡</sup> |  |
| Tetile 3                  | 28.97 ± 0.10 | 28.53 ± 0.29 | 28.37 ± 0.36              | 28.72 ± 0.19              | 28.52 ± 0.24              | 28.84 ± 0.34 <sup>†</sup> | 29.14 ± 0.22 <sup>†</sup> | 29.65 ± 0.23 <sup>‡</sup> | 29.96 ± 0.27 <sup>‡</sup> |  |

\* Data are presented incorporating sample weights and adjusted for clusters and strata of the complex sample design of the National Health and Nutrition Examination Survey (2003–2018). (<sup>†</sup> p < 0.05; <sup>‡</sup> p < 0.01)

Abbreviations: AA, Associate of Arts; BMI, body mass index; CI, confidence interval.



Table S3. Prevalence of obesity over time among adults in the United States, 2003-2018 \*

| Characteristics       | Prevalence (95CI),%  |                          |                          |                          |                          |                          |                          |                          |                          |
|-----------------------|----------------------|--------------------------|--------------------------|--------------------------|--------------------------|--------------------------|--------------------------|--------------------------|--------------------------|
|                       | Total<br>(n= 42,266) | 2003/2004<br>(n = 4,647) | 2005/2006<br>(n = 4,680) | 2007/2008<br>(n = 5,607) | 2009/2010<br>(n = 5,994) | 2011/2012<br>(n = 5,237) | 2013/2014<br>(n = 5,520) | 2015/2016<br>(n = 5,406) | 2017/2018<br>(n = 5,175) |
| Overall               | 36.7 (35.7, 37.6)    | 32.3 (29.9, 34.6)        | 34.4 (31.6, 37.2)        | 33.7 (31.5, 35.9)        | 35.8 (34.0, 37.7)        | 35.2 (32.4, 37.9)        | 37.9 (36.2, 39.6)        | 40.0 (37.0, 43.0)        | 42.8 (39.5, 46.1)        |
| Age, years            |                      |                          |                          |                          |                          |                          |                          |                          |                          |
| < 30                  | 29.6 (27.9, 31.4)    | 26.1 (23.1, 29.0)        | 27.7 (22.7, 32.6)        | 27.4 (21.6, 33.2)        | 27.7 (24.0, 31.4)        | 29.0 (23.9, 34.1)        | 29.5 (25.8, 33.1)        | 31.7 (26.7, 36.7) ‡      | 37.5 (30.2, 44.8) ‡      |
| 30 - 39               | 37.1 (35.5, 38.7)    | 32.5 (27.6, 37.5)        | 31.1 (26.6, 35.6)        | 35.5 (30.5, 39.7)        | 39.7 (35.4, 44.1) †      | 33.5 (30.2, 36.9)        | 39.9 (35.9, 43.9) †      | 40.5 (37.0, 44.1) †      | 44.3 (38.8, 49.9) ‡      |
| 40 - 49               | 39.3 (37.7, 40.9)    | 36.7 (34.2, 39.2)        | 39.0 (34.4, 43.6)        | 33.7 (29.4, 38.1)        | 36.2 (33.0, 39.5)        | 38.8 (33.4, 44.2)        | 41.1 (35.7, 46.5)        | 44.0 (38.1, 49.8) †      | 46.3 (41.7, 51.0) ‡      |
| 50 - 59               | 40.5 (38.6, 42.4)    | 35.9 (29.6, 42.1)        | 43.2 (38.6, 47.7)        | 38.1 (32.5, 43.6)        | 37.2 (33.8, 40.5)        | 39.5 (33.2, 45.9)        | 41.7 (37.1, 46.3)        | 42.7 (35.8, 49.6)        | 44.9 (40.7, 49.1) ‡      |
| 60 - 69               | 41.6 (39.6, 43.6)    | 35.7 (32.1, 39.3)        | 38.7 (34.1, 43.3)        | 38.6 (34.4, 42.8)        | 43.8 (39.7, 48.0) ‡      | 39.5 (34.5, 44.6) ‡      | 42.9 (38.9, 46.9) †      | 46.0 (40.3, 51.6) ‡      | 43.3 (35.3, 51.4) †      |
| ≥ 70                  | 32.2 (30.7, 33.6)    | 26.2 (22.4, 30.0)        | 25.8 (21.4, 30.2)        | 30.9 (27.0, 34.8) †      | 33.4 (30.0, 36.8) ‡      | 29.5 (26.4, 32.7) ‡      | 32.7 (28.4, 37.0) ‡      | 35.5 (30.9, 40.1) ‡      | 40.3 (36.0, 44.6) ‡      |
| Sex                   |                      |                          |                          |                          |                          |                          |                          |                          |                          |
| Men                   | 35.3 (34.1, 36.6)    | 30.9 (28.4, 33.4)        | 33.0 (28.9, 37.1)        | 32.0 (29.1, 34.8)        | 35.3 (31.9, 38.7) †      | 33.8 (31.2, 36.4)        | 35.2 (33.2, 37.2) ‡      | 38.1 (33.9, 42.3) ‡      | 43.3 (38.2, 48.4) ‡      |
| Women                 | 37.9 (36.8, 38.9)    | 33.6 (30.3, 36.8)        | 35.6 (33.0, 38.3)        | 35.3 (33.0, 37.6)        | 36.3 (34.5, 38.1) †      | 36.4 (33.0, 39.8) ‡      | 40.4, 37.9, 43.0) ‡      | 41.7 (38.7, 44.7) ‡      | 42.3 (38.6, 46.0) ‡      |
| Race                  |                      |                          |                          |                          |                          |                          |                          |                          |                          |
| Mexican American      | 43.1 (41.5, 44.8)    | 36.3 (31.2, 41.4)        | 33.3 (31.6, 35.1)        | 39.2 (32.2, 46.2)        | 38.9 (36.4, 43.4)        | 45.2 (40.7, 49.7) ‡      | 46.7 (42.5, 51.0) ‡      | 49.0 (45.6, 52.4) ‡      | 51.6 (47.5, 55.8) ‡      |
| Other Hispanic        | 37.0 (35.0, 39.1)    | 29.5 (19.2, 39.8)        | 34.2 (26.6, 41.9)        | 34.9 (30.3, 39.6)        | 34.7 (28.8, 40.6)        | 38.1 (32.7, 43.6) ‡      | 36.9 (31.2, 42.6) †      | 44.2 (38.4, 49.9) ‡      | 37.0 (42.7, 41.2) ‡      |
| Non-Hispanic White    | 35.5 (34.4, 36.6)    | 31.0 (28.5, 33.4)        | 33.3 (30.2, 36.5)        | 32.6 (29.2, 36.0)        | 34.7 (32.4, 37.1) ‡      | 33.4 (29.9, 37.0) ‡      | 37.0 (35.0, 39.1) ‡      | 38.9 (35.7, 42.1) ‡      | 43.0 (38.2, 47.7) ‡      |
| Non-Hispanic Black    | 47.1 (45.7, 48.5)    | 45.2 (40.9, 49.4)        | 45.4 (42.0, 48.8)        | 43.6 (39.6, 47.5)        | 49.9 (45.1, 54.7)        | 47.8 (44.3, 51.2)        | 47.9 (43.8, 52.1)        | 46.8 (42.5, 51.1)        | 49.8 (46.9, 52.7)        |
| Other race            | 23.7 (21.4, 25.9)    | 19.0 (9.9, 28.0)         | 26.4 (17.6, 35.2)        | 19.4 (9.9, 29.0)         | 19.7 (15.4, 24.0)        | 18.8 (13.9, 23.8)        | 21.4 (16.7, 26.0)        | 28.0 (21.3, 36.7)        | 30.6 (25.5, 35.7) †      |
| Education             |                      |                          |                          |                          |                          |                          |                          |                          |                          |
| Less than high school | 37.9 (36.7, 39.2)    | 34.3 (30.0, 38.5)        | 35.7 (33.3, 38.1)        | 37.6 (33.1, 42.0)        | 37.6 (34.9, 40.3) †      | 37.7 (35.1, 40.4) †      | 40.6 (37.5, 43.6)        | 40.3 (36.3, 43.7) ‡      | 41.4 (37.3, 45.6) †      |
| High school graduate  | 40.0 (38.5, 41.4)    | 34.3 (30.5, 38.1)        | 38.9 (35.1, 42.6)        | 35.0 (31.6, 38.4)        | 38.3 (34.6, 42.0)        | 40.3 (35.3, 45.5) †      | 41.3 (37.0, 45.7) ‡      | 43.7 (38.6, 48.9) ‡      | 47.2 (43.2, 51.2) ‡      |

1  
2  
3  
4  
5  
6  
7  
8  
9  
10  
11  
12  
13  
14  
15  
16  
17  
18  
19  
20  
21  
22  
23  
24  
25  
26  
27  
28  
29  
30  
31  
32  
33  
34  
35  
36  
37  
38  
39  
40  
41  
42  
43  
44  
45  
46

|    |                           |                   |                   |                    |                    |                    |                    |                    |                    |                    |
|----|---------------------------|-------------------|-------------------|--------------------|--------------------|--------------------|--------------------|--------------------|--------------------|--------------------|
| 5  | Some college or AA degree | 40.7 (39.4, 41.9) | 33.9 (30.4, 37.4) | 36.8 (32.9, 40.7)  | 37.5 (34.4, 40.6)  | 40.6 (38.3, 42.9)‡ | 38.0 (34.0, 41.9)† | 42.9 (40.1, 45.7)‡ | 46.0 (42.2, 49.8)‡ | 47.7 (43.8, 51.5)‡ |
| 6  | College graduate or above | 28.8 (27.2, 30.4) | 26.3 (22.0, 30.7) | 26.2 (21.9, 30.5)  | 24.9 (20.9, 28.9)  | 27.5 (23.7, 31.4)  | 27.6 (22.5, 32.8)  | 28.7 (26.2, 31.3)† | 31.5 (27.5, 35.4)‡ | 34.7 (29.1, 40.2)‡ |
| 8  | Poverty income ratio      |                   |                   |                    |                    |                    |                    |                    |                    |                    |
| 9  | < 130%                    | 38.4 (37.2, 39.6) | 32.3 (29.7, 34.6) | 36.3 (33.1, 39.6)‡ | 35.9 (32.1, 39.7)† | 38.4 (34.8, 41.9)‡ | 38.0 (35.5, 40.6)‡ | 39.4 (36.9, 41.8)‡ | 42.0 (38.1, 45.9)‡ | 43.8 (39.7, 47.9)‡ |
| 10 | ≥ 130%                    | 36.4 (35.3, 37.4) | 32.3 (29.6, 34.9) | 34.3 (31.0, 37.6)  | 33.1 (30.9, 35.4)  | 35.7 (33.4, 37.9)† | 34.3 (31.0, 37.6)† | 37.6 (35.3, 40.0)‡ | 39.8 (36.3, 43.2)‡ | 43.1 (39.6, 46.7)‡ |
| 11 | Physical activity         |                   |                   |                    |                    |                    |                    |                    |                    |                    |
| 12 | Inactive                  | 44.8 (43.4, 46.2) | 38.0 (30.4, 45.6) | 41.7 (29.5, 53.9)  | 42.6 (39.7, 45.4)  | 44.4 (42.4, 46.4)  | 26.2 (20.0, 32.3)† | 48.5 (44.9, 52.1)† | 48.0 (44.5, 51.5)† | 46.7 (43.1, 50.4)† |
| 14 | Insufficiently active     | 36.4 (34.8, 38.0) | 33.7 (30.6, 36.7) | 34.0 (30.8, 37.3)  | 36.3 (31.1, 41.4)  | 37.3 (33.0, 41.6)  | 27.4 (22.0, 32.8)† | 36.9 (33.6, 40.1)  | 44.5 (37.2, 51.8)‡ | 48.3 (41.7, 54.9)‡ |
| 15 | Sufficiently active       | 34.3 (33.2,35.4)  | 24.8 (21.5, 28.2) | 29.1 (24.9, 33.4)  | 30.0 (27.5, 32.5)† | 32.3 (29.7, 34.9)‡ | 36.9 (34.2, 39.5)‡ | 33.7 (31.9, 35.5)‡ | 36.6 (33.4, 39.7)‡ | 40.6 (36.7, 44.6)‡ |
| 16 | Total energy intake       |                   |                   |                    |                    |                    |                    |                    |                    |                    |
| 17 | Tetile 1                  | 39.9 (38.4,41.3)  | 34.5 (32.2, 36.8) | 38.2 (34.8, 41.7)  | 36.1 (33.1, 39.0)  | 39.3 (36.1, 42.5)‡ | 38.5 (33.6, 43.4)  | 40.8 (36.2, 45.3)‡ | 43.4 (39.2, 47.6)‡ | 46.1 (41.4, 50.8)‡ |
| 19 | Tetile 2                  | 36.0 (34.5, 37.6) | 30.1 (26.7, 33.4) | 35.8 (31.7, 39.8)† | 32.1 (28.5, 35.7)  | 36.1 (32.8, 39.4)† | 34.7 (31.4, 38.1)‡ | 38.0 (33.4, 42.7)‡ | 37.9 (33.2, 42.7)‡ | 43.3 (37.1, 49.4)‡ |
| 20 | Tetile 3                  | 36.7 (35.5, 38.0) | 33.9 (29.9, 37.8) | 32.6 (28.4, 36.9)  | 34.8 (32.0, 37.6)  | 35.0 (31.6, 38.4)  | 35.4 (31.6, 39.3)† | 37.5 (34.8, 40.2)† | 41.3 (37.6, 45.1)‡ | 43.3 (39.4, 47.2)‡ |

\* Data are presented incorporating sample weights and adjusted for clusters and strata of the complex sample design of the National Health and Nutrition Examination Survey (2003–2018). († p < 0.05; ‡ p < 0.01)

Abbreviations: AA, Associate of Arts; BMI, body mass index; CI, confidence interval.

Table S4. Prevalence of overweight over time among adults in the United States, 2003-2018 \*

| Characteristics       | Prevalence (95CI),%  |                          |                          |                          |                                |                                |                                |                                |                                |
|-----------------------|----------------------|--------------------------|--------------------------|--------------------------|--------------------------------|--------------------------------|--------------------------------|--------------------------------|--------------------------------|
|                       | Total<br>(n= 42,266) | 2003/2004<br>(n = 4,647) | 2005/2006<br>(n = 4,680) | 2007/2008<br>(n = 5,607) | 2009/2010<br>(n = 5,994)       | 2011/2012<br>(n = 5,237)       | 2013/2014<br>(n = 5,520)       | 2015/2016<br>(n = 5,406)       | 2017/2018<br>(n = 5,175)       |
| Overall               | 69.6 (68.7, 70.5)    | 66.3 (64.4, 68.3)        | 67.2 (64.6, 69.8)        | 68.0 (66.2, 69.8)        | 69.2 (66.6, 71.7)              | 69.1 (65.9, 72.3)              | 70.7 (69.0, 72.3)              | 71.8 (68.9, 74.8)              | 73.8 (71.1, 76.4)              |
| Age, years            |                      |                          |                          |                          |                                |                                |                                |                                |                                |
| 20 - 30               | 56.6 (54.7, 58.5)    | 53.4 (49.1, 57.6)        | 56.4 (51.9, 60.8)        | 55.2 (51.1, 59.3)        | 56.7 (50.7, 62.7)              | 54.9 (47.4, 62.3)              | 56.6 (52.4, 60.9)              | 59.7 (55.3, 64.1) <sup>†</sup> | 59.4 (53.2, 65.5) <sup>†</sup> |
| 30 - 39               | 69.8 (68.1, 71.4)    | 63.0 (57.7, 68.4)        | 64.6 (59.1, 70.0)        | 69.3 (65.9, 72.8)        | 70.7 (67.0, 74.5) <sup>†</sup> | 68.6 (64.4, 72.7)              | 72.3 (68.2, 76.3) <sup>‡</sup> | 73.2 (69.5, 76.8) <sup>‡</sup> | 76.2 (70.6, 81.8) <sup>‡</sup> |
| 40 - 49               | 74.0 (72.4, 75.5)    | 73.9 (69.2, 78.6)        | 70.2 (66.2, 74.2)        | 71.4 (67.6, 75.3)        | 69.6 (66.4, 72.9)              | 75.9 (71.7, 80.1)              | 76.6 (73.0, 80.2)              | 73.9 (68.7, 79.0)              | 80.9 (75.5, 86.3)              |
| 50 - 59               | 74.0 (72.4, 75.6)    | 71.1 (66.7, 75.5)        | 75.5 (91.0, 79.9)        | 71.9 (66.7, 77.1)        | 74.3 (70.0, 78.5)              | 75.2 (70.6, 79.8)              | 74.6 (72.2, 77.0)              | 74.1 (69.6, 78.7)              | 74.8 (69.3, 80.4)              |
| 60 - 69               | 77.1 (75.4, 78.8)    | 76.7 (73.4, 80.1)        | 76.7 (71.7, 81.6)        | 75.5 (71.4, 79.6)        | 78.6 (74.7, 82.5)              | 74.4 (68.3, 80.6)              | 76.0 (72.5, 79.5)              | 80.1 (74.5, 85.7)              | 78.1 (73.6, 82.5)              |
| ≥ 70                  | 70.2 (68.9, 71.4)    | 65.6 (61.0, 70.2)        | 63.9 (60.4, 67.4)        | 69.1 (65.8, 72.4)        | 71.0 (68.2, 73.8) <sup>†</sup> | 67.4 (63.8, 70.9) <sup>†</sup> | 70.8 (68.2, 73.4) <sup>†</sup> | 73.8 (70.2, 77.4) <sup>‡</sup> | 77.1 (73.5, 80.7) <sup>‡</sup> |
| Sex                   |                      |                          |                          |                          |                                |                                |                                |                                |                                |
| Male                  | 73.5 (72.5, 75.6)    | 70.6 (68.0, 73.0)        | 73.2 (70.3, 76.2)        | 71.9 (70.1, 73.7)        | 74.0 (70.4, 77.6)              | 71.8 (68.6, 75.0)              | 74.0 (71.9, 76.1) <sup>†</sup> | 74.9 (72.0, 77.8) <sup>†</sup> | 77.4 (73.9, 80.9) <sup>‡</sup> |
| Female                | 66.0 (64.9, 67.1)    | 62.5 (59.9, 65.9)        | 61.6 (58.3, 64.8)        | 64.4 (61.7, 67.1)        | 64.7 (62.3, 67.1)              | 66.6 (63.0, 70.2) <sup>‡</sup> | 67.6 (65.2, 70.0) <sup>‡</sup> | 69.0 (65.4, 72.6) <sup>‡</sup> | 70.5 (67.3, 73.6) <sup>‡</sup> |
| Race                  |                      |                          |                          |                          |                                |                                |                                |                                |                                |
| Mexican American      | 79.7 (78.1, 81.2)    | 73.8 (67.8, 79.8)        | 73.4 (69.8, 77.0)        | 77.3 (73.3, 81.2)        | 79.9 (76.5, 83.3)              | 78.6 (72.7, 84.5)              | 83.2 (80.1, 86.3) <sup>†</sup> | 82.8 (78.9, 86.8) <sup>‡</sup> | 85.3 (80.8, 89.9) <sup>‡</sup> |
| Other Hispanic        | 74.6 (72.9, 76.3)    | 68.4 (58.1, 78.7)        | 70.5 (62.3, 78.8)        | 74.8 (69.5, 80.1)        | 72.2 (69.4, 75.1)              | 75.2 (71.8, 78.7)              | 70.0 (64.7, 75.2)              | 78.5 (74.8, 82.2)              | 80.0 (76.0, 84.1) <sup>†</sup> |
| Non-Hispanic White    | 68.7 (67.7, 69.8)    | 65.2 (62.3, 68.0)        | 66.1 (62.8, 69.4)        | 67.2 (64.6, 69.9)        | 68.1 (65.0, 71.2)              | 68.7 (64.9, 72.5) <sup>†</sup> | 70.6 (69.0, 72.2) <sup>†</sup> | 71.5 (68.6, 74.3) <sup>†</sup> | 72.2 (68.6, 75.8) <sup>‡</sup> |
| Non-Hispanic Black    | 75.5 (74.4, 76.6)    | 75.8 (72.8, 78.7)        | 75.5 (72.0, 79.1)        | 73.0 (70.6, 75.4)        | 76.4 (73.3, 79.5)              | 76.2 (73.0, 79.4)              | 75.5 (72.2, 78.7)              | 75.0 (71.8, 78.1)              | 76.4 (73.6, 79.1)              |
| Other race            | 54.1 (51.9, 56.3)    | 50.4 (42.2, 58.6)        | 51.0 (40.9, 61.0)        | 49.2 (41.9, 56.5)        | 53.0 (45.8, 60.1)              | 47.3 (43.5, 51.1)              | 50.1 (44.3, 56.0)              | 55.8 (50.6, 61.0)              | 66.5 (63.1, 70.0) <sup>‡</sup> |
| Education             |                      |                          |                          |                          |                                |                                |                                |                                |                                |
| Less than high school | 71.8 (70.4, 73.2)    | 66.9 (61.8, 72.0)        | 67.8 (64.6, 71.0)        | 71.3 (68.5, 74.1)        | 75.0 (70.9, 79.1) <sup>‡</sup> | 71.7 (67.7, 75.7)              | 73.7 (70.9, 76.4) <sup>†</sup> | 73.8 (69.1, 78.6) <sup>†</sup> | 74.7 (71.4, 78.0) <sup>‡</sup> |

1  
2  
3  
4  
5  
6  
7  
8  
9  
10  
11  
12  
13  
14  
15  
16  
17  
18  
19  
20  
21  
22  
23  
24  
25  
26  
27  
28  
29  
30  
31  
32  
33  
34  
35  
36  
37  
38  
39  
40  
41  
42  
43  
44  
45  
46

|                           |                   |                   |                    |                    |                    |                    |                    |                    |                    |  |
|---------------------------|-------------------|-------------------|--------------------|--------------------|--------------------|--------------------|--------------------|--------------------|--------------------|--|
| High school graduate      | 72.4 (71.2, 73.6) | 69.5 (67.4, 71.6) | 70.0 (66.3, 73.7)  | 69.9 (66.8, 72.9)  | 71.3 (68.3, 74.4)  | 73.1 (68.1, 78.1)  | 73.6 (70.5, 76.8)† | 77.3 (73.4, 81.2)‡ | 74.7 (71.6, 77.8)‡ |  |
| Some college or AA degree | 71.9 (70.7, 73.1) | 68.1 (64.8, 71.3) | 70.1 (66.8, 73.4)  | 69.0 (66.2, 71.8)  | 70.2 (66.6, 73.8)  | 70.5 (65.8, 75.2)  | 74.4 (72.4, 76.5)‡ | 74.7 (71.8, 77.6)‡ | 76.9 (73.6, 80.1)‡ |  |
| College graduate or above | 63.6 (62.0, 65.2) | 60.0 (55.0, 65.0) | 60.4 (55.2, 65.7)  | 62.3 (58.1, 66.5)‡ | 62.6 (57.3, 68.0)  | 63.8 (58.6, 69.0)‡ | 63.0 (59.7, 66.2)‡ | 64.5 (60.2, 68.9)‡ | 69.5 (65.0, 74.0)‡ |  |
| Poverty income ratio      |                   |                   |                    |                    |                    |                    |                    |                    |                    |  |
| ≤ 130%                    | 68.8 (67.4, 70.3) | 62.6 (59.1, 66.1) | 67.3 (63.1, 71.6)‡ | 67.1 (63.9, 70.4)† | 71.1 (66.3, 75.8)‡ | 68.4 (64.2, 72.7)‡ | 69.1 (65.9, 72.4)‡ | 72.6 (68.1, 77.2)‡ | 71.0 (67.1, 74.9)‡ |  |
| > 130%                    | 69.9 (68.9, 70.9) | 67.3 (64.8, 69.8) | 67.2 (64.1, 70.4)  | 68.3 (66.5, 70.2)  | 68.8 (65.9, 71.6)  | 69.3 (65.6, 73.0)  | 71.3 (69.1, 73.6)† | 71.6 (68.2, 75.0)† | 74.9 (72.3, 77.4)‡ |  |
| Physical activity         |                   |                   |                    |                    |                    |                    |                    |                    |                    |  |
| Inactive                  | 75.6 (74.3, 76.9) | 67.8 (59.4, 76.0) | 74.2 (66.0, 82.6)  | 71.7 (69.5, 74.0)  | 76.3 (73.4, 79.2)  | 63.2 (56.5, 69.9)  | 78.4 (75.4, 81.5)† | 77.6 (73.8, 81.4)† | 78.3 (75.4, 81.2)† |  |
| Insufficiently active     | 69.7 (68.1, 71.3) | 68.3 (66.1, 70.5) | 68.2 (63.6, 72.7)  | 69.4 (65.9, 73.0)  | 68.1 (64.1, 72.1)  | 59.6 (53.1, 66.1)† | 71.0 (66.0, 76.0)  | 76.0 (70.1, 81.8)† | 81.1 (77.8, 84.4)‡ |  |
| Sufficiently active       | 67.9 (66.7, 69.1) | 60.9 (56.1, 65.7) | 62.0 (58.2, 65.7)  | 66.4 (63.9, 68.8)  | 66.7 (62.9, 70.4)  | 70.8 (67.6, 74.0)‡ | 67.4 (65.4, 69.4)† | 69.3 (66.3, 72.2)‡ | 71.1 (67.8, 74.5)‡ |  |
| Total energy intake       |                   |                   |                    |                    |                    |                    |                    |                    |                    |  |
| Tetile 1                  | 70.9 (69.4, 72.3) | 66.9 (63.7, 70.1) | 68.1 (64.1, 72.0)  | 71.0 (67.4, 74.5)  | 69.7 (66.0, 73.3)  | 71.8 (66.7, 76.9)  | 72.9 (69.1, 76.7)‡ | 73.9 (69.9, 77.9)‡ | 71.7 (67.5, 75.8)‡ |  |
| Tetile 2                  | 70.7 (69.3, 72.0) | 65.0 (61.8, 68.2) | 70.0 (66.3, 73.6)† | 68.2 (64.2, 72.1)  | 70.6 (66.7, 74.6)† | 71.5 (67.6, 75.3)† | 73.2 (69.6, 76.8)‡ | 71.1 (66.6, 75.7)† | 75.4 (72.0, 78.9)‡ |  |
| Tetile 3                  | 69.8 (68.7, 71.0) | 68.4 (64.9, 71.9) | 66.7 (63.0, 70.4)  | 68.7 (66.2, 71.3)  | 69.1 (65.0, 73.1)  | 68.2 (64.9, 71.4)  | 69.6 (66.9, 72.3)  | 73.1 (70.3, 75.8)† | 75.0 (71.4, 78.5)† |  |

\* Data are presented incorporating sample weights and adjusted for clusters and strata of the complex sample design of the National Health and Nutrition Examination Survey (2003–2018). († p < 0.05; ‡ p < 0.01)

Abbreviations: AA, Associate of Arts; BMI, body mass index; CI, confidence interval.

**Table S5. Change in mean BMI by sex among adults in the United States, 2003-2018**

| Years       | Weighted mean BMI             |         |                               |         |                               |         |
|-------------|-------------------------------|---------|-------------------------------|---------|-------------------------------|---------|
|             | Men                           |         | Women                         |         | Both                          |         |
|             | Adjusted $\beta$ *<br>(95%CI) | p-value | Adjusted $\beta$ *<br>(95%CI) | p-value | Adjusted $\beta$ *<br>(95%CI) | p-value |
| 2003 - 2004 | Reference                     |         | Reference                     |         | Reference                     |         |
| 2005 - 2006 | 0.38 (-0.29,1.06)             | 0.259   | 0.44 (-0.47, 1.35)            | 0.338   | 0.38 (-0.23,0.99)             | 0.215   |
| 2007 - 2008 | 0.42 (-0.14,0.97)             | 0.139   | 0.52 (-0.10, 1.15)            | 0.102   | 0.48 (0.04,0.93)              | 0.035   |
| 2009 - 2010 | 0.72 (0.09,1.35)              | 0.025   | 0.64 (0.04, 1.23)             | 0.037   | 0.70 (0.26,1.15)              | 0.002   |
| 2011 - 2012 | 0.64 (0.04, 1.23)             | 0.035   | 1.50 (0.84, 2.16)             | <0.001  | 1.08 (0.55, 1.61)             | <0.001  |
| 2013 - 2014 | 0.73 (0.18, 1.28)             | 0.010   | 1.55 (0.78, 2.32)             | <0.001  | 1.18 (0.66, 1.70)             | <0.001  |
| 2015 - 2016 | 1.28 (0.62, 1.95)             | <0.001  | 1.88 (1.15, 2.61)             | <0.001  | 1.59 (1.03, 2.20)             | <0.001  |
| 2017 - 2018 | 1.62 (1.00, 2.24)             | <0.001  | 2.26 (1.30, 3.21)             | <0.001  | 1.96 (1.34, 2.57)             | <0.001  |
| P for trend |                               | <0.001  |                               | <0.001  |                               | <0.001  |

Abbreviations: CI, confidence interval.

\* Models adjusted for age, sex, race, education, family poverty income ratio, daily total energy intake and physical activity status.

**Table S6. Change in prevalence of obesity by sex among adults in the United States, 2003-2018**

| Years       | Prevalence of obesity    |         |                          |         |                          |         |
|-------------|--------------------------|---------|--------------------------|---------|--------------------------|---------|
|             | Men                      |         | Women                    |         | Both                     |         |
|             | Adjusted OR *<br>(95%CI) | p-value | Adjusted OR *<br>(95%CI) | p-value | Adjusted OR *<br>(95%CI) | p-value |
| 2003 - 2004 | Reference                |         | Reference                |         | Reference                |         |
| 2005 - 2006 | 1.03 (0.96, 1.09)        | 0.402   | 1.04 (0.98, 1.09)        | 0.197   | 1.03 (0.99, 1.07)        | 0.184   |
| 2007 - 2008 | 1.03 (0.98, 1.08)        | 0.229   | 1.03 (0.99, 1.07)        | 0.193   | 1.03 (1.00, 1.06)        | 0.084   |
| 2009 - 2010 | 1.07 (1.02, 1.13)        | 0.008   | 1.04 (1.01, 1.08)        | 0.026   | 1.06 (1.03, 1.09)        | <0.001  |
| 2011 - 2012 | 1.06 (1.03, 1.11)        | 0.028   | 1.08 (1.04, 1.13)        | <0.001  | 1.07 (1.03, 1.11)        | <0.001  |
| 2013 - 2014 | 1.06 (1.01, 1.11)        | 0.011   | 1.08 (1.05, 1.14)        | <0.001  | 1.08 (1.04, 1.11)        | <0.001  |
| 2015 - 2016 | 1.11 (1.04, 1.18)        | <0.001  | 1.12 (1.07, 1.17)        | <0.001  | 1.11 (1.07, 1.16)        | <0.001  |
| 2017 - 2018 | 1.17 (1.09, 1.24)        | <0.001  | 1.14 (1.08, 1.21)        | <0.001  | 1.15 (1.10, 1.21)        | <0.001  |
| P for trend |                          | <0.001  |                          | <0.001  |                          | <0.001  |

Abbreviations: CI, confidence interval; OR, odds ratio.

Crude model: we did not adjust other covariants.

\* Models adjusted for age, sex, race, education, family poverty income ratio, daily total energy intake and physical activity status.

**Table S7. Change in prevalence of overweight by sex among adults in the United States, 2003-2018**

| Years       | Prevalence of overweight |         |                          |         |                          |         |
|-------------|--------------------------|---------|--------------------------|---------|--------------------------|---------|
|             | Men                      |         | Women                    |         | Both                     |         |
|             | Adjusted OR *<br>(95%CI) | p-value | Adjusted OR *<br>(95%CI) | p-value | Adjusted OR *<br>(95%CI) | p-value |
| 2003 - 2004 | Reference                |         | Reference                |         | Reference                |         |
| 2005 - 2006 | 1.01 (0.96, 1.06)        | 0.580   | 1.01 (0.95, 1.08)        | 0.690   | 1.01 (0.97, 1.05)        | 0.598   |
| 2007 - 2008 | 1.00 (0.96, 1.05)        | 0.868   | 1.03 (0.98, 1.08)        | 0.206   | 1.02 (0.98, 1.05)        | 0.281   |
| 2009 - 2010 | 1.02 (0.97, 1.08)        | 0.406   | 1.03 (0.98, 1.08)        | 0.248   | 1.03 (0.99, 1.07)        | 0.178   |
| 2011 - 2012 | 1.01 (0.96, 1.06)        | 0.819   | 1.08 (1.03, 1.14)        | 0.002   | 1.05 (1.00, 1.09)        | 0.034   |
| 2013 - 2014 | 1.02 (0.98, 1.07)        | 0.370   | 1.07 (1.02, 1.12)        | 0.010   | 1.05 (1.01, 1.08)        | 0.012   |
| 2015 - 2016 | 1.03 (0.98, 1.08)        | 0.305   | 1.09 (1.04, 1.15)        | 0.001   | 1.06 (1.02, 1.10)        | 0.005   |
| 2017 - 2018 | 1.05 (1.00, 1.11)        | 0.050   | 1.11 (1.05, 1.17)        | <0.001  | 1.08 (1.04, 1.13)        | <0.001  |
| P for trend |                          | <0.001  |                          | <0.001  |                          | <0.001  |

Abbreviations: CI, confidence interval; OR, odds ratio.

\* Models adjusted for age, sex, race, education, family poverty income ratio, daily total energy intake and physical activity status.

**Table S8. Characteristics of participants according to tertiles of daily total energy intake\***

| Characteristic                 | Total<br>(n=34,625) | Daily total energy intake (Kcal/d) † |                       |                        | P-value |
|--------------------------------|---------------------|--------------------------------------|-----------------------|------------------------|---------|
|                                |                     | Tertile1<br>(n=9,991)                | Tertile2<br>(n=8,990) | Tertile3<br>(n=1,5644) |         |
| Age, years                     | 48.81 ± 0.48        | 49.57 ± 0.28                         | 48.23± 0.28           | 46.38 ± 0.25           | < 0.001 |
| Sex, n (%)                     |                     |                                      |                       |                        | < 0.001 |
| Male, n (%)                    | 16,457 (47.20)      | 3,159 (27.81)                        | 4,442 (48.79)         | 8,856 (56.63)          |         |
| Female, n (%)                  | 18,168 (52.80)      | 6,832 (72.19)                        | 4,548 (51.21)         | 6,788 (43.37)          |         |
| Race, n (%)                    |                     |                                      |                       |                        | < 0.001 |
| Mexican American               | 5,430 (7.85)        | 1,670 (8.43)                         | 1,383 (7.43)          | 2,377 (7.78)           |         |
| Other Hispanic                 | 2,973 (5.02)        | 1,049 (6.46)                         | 698 (4.33)            | 1,226 (4.65)           |         |
| Non-Hispanic White             | 15,635 (69.51)      | 3,905 (64.17)                        | 4,353 (72.29)         | 7,377 (70.77)          |         |
| Non-Hispanic Black             | 7,384 (10.97)       | 2,465 (13.87)                        | 1,759 (9.64)          | 3,160 (10.19)          |         |
| Other Race                     | 3,203 (6.64)        | 902.00 (7.06)                        | 797.00 (6.31)         | 1,504 (6.60)           |         |
| Education, n (%)               |                     |                                      |                       |                        | < 0.001 |
| Less than high school          | 8,224 (14.99)       | 3,085 (19.78)                        | 1,912(13.29)          | 3,227 (13.39)          |         |
| High school graduate           | 8,042 (23.55)       | 2,397 (25.76)                        | 2,051 (22.95)         | 3,594 (22.71)          |         |
| Some college or AA degree      | 10,281 (31.61)      | 2,727 (29.98)                        | 2,748 (32.51)         | 4,806 (31.98)          |         |
| College graduate or above      | 8,049 (29.80)       | 1,773 (24.41)                        | 2,272 (31.20)         | 4,004 (31.88)          |         |
| Poverty income ratio, n (%)    |                     |                                      |                       |                        | < 0.001 |
| < 130%                         | 9,588 (19.89)       | 3,157(24.23)                         | 2,335 (18.50)         | 4,096 (18.41)          |         |
| ≥ 130%                         | 22,370 (80.11)      | 5,931(75.77)                         | 5,972 (81.50)         | 10,467 (81.59)         |         |
| BMI, kg/m <sup>2</sup>         | 29.05 ±0.08         | 29.30±0.11                           | 28.95 ±0.11           | 28.97±0.10             |         |
| BMI, kg/m <sup>2</sup> (group) |                     |                                      |                       |                        | < 0.001 |
| < 25                           | 9,896 (30.04)       | 2,614 (29.47)                        | 2,609 (29.83)         | 4,673 (30.47)          |         |
| 25 - 30                        | 11,505 (32.91)      | 3,245 (31.00)                        | 3,080 (34.39)         | 5,180 (33.09)          |         |
| ≥ 30                           | 13,224 (37.04)      | 4,132 (39.53)                        | 3,301 (35.78)         | 5,791 (36.44)          |         |
| Overweight                     |                     |                                      |                       |                        | 0.3     |
| No                             | 9,788 (29.68)       | 2,583 (29.14)                        | 2,576 (29.33)         | 4,629 (30.16)          |         |
| Yes                            | 24,837 (70.32)      | 7,408 (70.86)                        | 6,414 (70.67)         | 11,015 (69.84)         |         |
| Obesity                        |                     |                                      |                       |                        | < 0.001 |
| No                             | 21,294 (62.65)      | 5,829 (60.14)                        | 5,660 (63.95)         | 9,805 (63.25)          |         |
| Yes                            | 13,331 (37.35)      | 4,162 (39.86)                        | 3,330 (36.05)         | 5,839 (36.75)          |         |
| Physical activity, n (%)       |                     |                                      |                       |                        | < 0.001 |
| Inactive                       | 6,677 (17.45)       | 2,329 (21.39)                        | 1,681 (16.85)         | 2,667 (15.71)          |         |
| Insufficiently active          | 5,548 (17.92)       | 1,540 (16.56)                        | 1,499 (18.54)         | 2,509 (18.29)          |         |
| Sufficiently active            | 19,207 (64.63)      | 5,127 (62.05)                        | 5,007 (64.61)         | 9,073 (66.00)          |         |

\* Data are presented incorporating sample weights and adjusted for clusters and strata of the complex sample design of the National Health and Nutrition Examination



1  
2  
3  
4 Survey (2003-2018).  
5

6 † Values are presented as mean  $\pm$  SE for continuous variables and unweighted  
7  
8  
9 numbers (weighted %) for categorical variables.  
10

11 Abbreviations: AA, Associate of Arts; BMI, body mass index  
12  
13  
14  
15  
16  
17  
18  
19  
20  
21  
22  
23  
24  
25  
26  
27  
28  
29  
30  
31  
32  
33  
34  
35  
36  
37  
38  
39  
40  
41  
42  
43  
44  
45  
46  
47  
48  
49  
50  
51  
52  
53  
54  
55  
56  
57  
58  
59  
60

**STROBE 2007 (v4) checklist of items to be included in reports of observational studies in epidemiology\***  
**Checklist for cohort, case-control, and cross-sectional studies (combined)**

| Section/Topic             | Item # | Recommendation                                                                                                                                                                                                                                                                                                                                                                                                                                                         | Reported on page # |
|---------------------------|--------|------------------------------------------------------------------------------------------------------------------------------------------------------------------------------------------------------------------------------------------------------------------------------------------------------------------------------------------------------------------------------------------------------------------------------------------------------------------------|--------------------|
| Title and abstract        | 1      | (a) Indicate the study's design with a commonly used term in the title or the abstract                                                                                                                                                                                                                                                                                                                                                                                 | 2                  |
|                           |        | (b) Provide in the abstract an informative and balanced summary of what was done and what was found                                                                                                                                                                                                                                                                                                                                                                    | 2,3                |
| <b>Introduction</b>       |        |                                                                                                                                                                                                                                                                                                                                                                                                                                                                        |                    |
| Background/rationale      | 2      | Explain the scientific background and rationale for the investigation being reported                                                                                                                                                                                                                                                                                                                                                                                   | 5                  |
| Objectives                | 3      | State specific objectives, including any pre-specified hypotheses                                                                                                                                                                                                                                                                                                                                                                                                      | 5                  |
| <b>Methods</b>            |        |                                                                                                                                                                                                                                                                                                                                                                                                                                                                        |                    |
| Study design              | 4      | Present key elements of study design early in the paper                                                                                                                                                                                                                                                                                                                                                                                                                | 6                  |
| Setting                   | 5      | Describe the setting, locations, and relevant dates, including periods of recruitment, exposure, follow-up, and data collection                                                                                                                                                                                                                                                                                                                                        | 6                  |
| Participants              | 6      | (a) <i>Cohort study</i> —Give the eligibility criteria, and the sources and methods of selection of participants. Describe methods of follow-up<br><i>Case-control study</i> —Give the eligibility criteria, and the sources and methods of case ascertainment and control selection. Give the rationale for the choice of cases and controls<br><i>Cross-sectional study</i> —Give the eligibility criteria, and the sources and methods of selection of participants | 7                  |
|                           |        | (b) <i>Cohort study</i> —For matched studies, give matching criteria and number of exposed and unexposed<br><i>Case-control study</i> —For matched studies, give matching criteria and the number of controls per case                                                                                                                                                                                                                                                 |                    |
| Variables                 | 7      | Clearly define all outcomes, exposures, predictors, potential confounders, and effect modifiers. Give diagnostic criteria, if applicable                                                                                                                                                                                                                                                                                                                               | 6,7                |
| Data sources/ measurement | 8*     | For each variable of interest, give sources of data and details of methods of assessment (measurement). Describe comparability of assessment methods if there is more than one group                                                                                                                                                                                                                                                                                   | 6,7                |
| Bias                      | 9      | Describe any efforts to address potential sources of bias                                                                                                                                                                                                                                                                                                                                                                                                              | 6,7                |
| Study size                | 10     | Explain how the study size was arrived at                                                                                                                                                                                                                                                                                                                                                                                                                              |                    |
| Quantitative variables    | 11     | Explain how quantitative variables were handled in the analyses. If applicable, describe which groupings were chosen and why                                                                                                                                                                                                                                                                                                                                           | 6,7                |
| Statistical methods       | 12     | (a) Describe all statistical methods, including those used to control for confounding                                                                                                                                                                                                                                                                                                                                                                                  | 7,8                |
|                           |        | (b) Describe any methods used to examine subgroups and interactions                                                                                                                                                                                                                                                                                                                                                                                                    | 7,8                |
|                           |        | (c) Explain how missing data were addressed                                                                                                                                                                                                                                                                                                                                                                                                                            | 7                  |
|                           |        | (d) <i>Cohort study</i> —If applicable, explain how loss to follow-up was addressed<br><i>Case-control study</i> —If applicable, explain how matching of cases and controls was addressed                                                                                                                                                                                                                                                                              | 7,8                |

|                          |     |                                                                                                                                                                                                                                                                                                                                                                                                               |         |
|--------------------------|-----|---------------------------------------------------------------------------------------------------------------------------------------------------------------------------------------------------------------------------------------------------------------------------------------------------------------------------------------------------------------------------------------------------------------|---------|
|                          |     | <i>Cross-sectional study</i> —If applicable, describe analytical methods taking account of sampling strategy                                                                                                                                                                                                                                                                                                  |         |
|                          |     | (e) Describe any sensitivity analyses                                                                                                                                                                                                                                                                                                                                                                         |         |
| <b>Results</b>           |     |                                                                                                                                                                                                                                                                                                                                                                                                               |         |
| Participants             | 13* | (a) Report numbers of individuals at each stage of study—eg numbers potentially eligible, examined for eligibility, confirmed eligible, included in the study, completing follow-up, and analysed<br>(b) Give reasons for non-participation at each stage<br>(c) Consider use of a flow diagram                                                                                                               | 8       |
| Descriptive data         | 14* | (a) Give characteristics of study participants (eg demographic, clinical, social) and information on exposures and potential confounders<br>(b) Indicate number of participants with missing data for each variable of interest<br>(c) <i>Cohort study</i> —Summarise follow-up time (eg, average and total amount)                                                                                           | 8,9     |
| Outcome data             | 15* | <i>Cohort study</i> —Report numbers of outcome events or summary measures over time<br><i>Case-control study</i> —Report numbers in each exposure category, or summary measures of exposure<br><i>Cross-sectional study</i> —Report numbers of outcome events or summary measures                                                                                                                             | 8,9     |
| Main results             | 16  | (a) Give unadjusted estimates and, if applicable, confounder-adjusted estimates and their precision (eg, 95% confidence interval). Make clear which confounders were adjusted for and why they were included<br>(b) Report category boundaries when continuous variables were categorized<br>(c) If relevant, consider translating estimates of relative risk into absolute risk for a meaningful time period | 9,10,11 |
| Other analyses           | 17  | Report other analyses done—eg analyses of subgroups and interactions, and sensitivity analyses                                                                                                                                                                                                                                                                                                                | 10,11   |
| <b>Discussion</b>        |     |                                                                                                                                                                                                                                                                                                                                                                                                               |         |
| Key results              | 18  | Summarise key results with reference to study objectives                                                                                                                                                                                                                                                                                                                                                      | 11      |
| Limitations              | 19  | Discuss limitations of the study, taking into account sources of potential bias or imprecision. Discuss both direction and magnitude of any potential bias                                                                                                                                                                                                                                                    | 13,14   |
| Interpretation           | 20  | Give a cautious overall interpretation of results considering objectives, limitations, multiplicity of analyses, results from similar studies, and other relevant evidence                                                                                                                                                                                                                                    | 14      |
| Generalisability         | 21  | Discuss the generalisability (external validity) of the study results                                                                                                                                                                                                                                                                                                                                         | 14      |
| <b>Other information</b> |     |                                                                                                                                                                                                                                                                                                                                                                                                               |         |
| Funding                  | 22  | Give the source of funding and the role of the funders for the present study and, if applicable, for the original study on which the present article is based                                                                                                                                                                                                                                                 | 14,15   |

\*Give information separately for cases and controls in case-control studies and, if applicable, for exposed and unexposed groups in cohort and cross-sectional studies.

**Note:** An Explanation and Elaboration article discusses each checklist item and gives methodological background and published examples of transparent reporting. The STROBE checklist is best used in conjunction with this article (freely available on the Web sites of PLoS Medicine at <http://www.plosmedicine.org/>, Annals of Internal Medicine at <http://www.annals.org/>, and Epidemiology at <http://www.epidem.com/>). Information on the STROBE Initiative is available at [www.strobe-statement.org](http://www.strobe-statement.org).
