# Supplementary material for: Trends in body mass index, overweight and obesity among adults in the USA, the NHANES from 2003 to 2018: a repeat cross-sectional survey
Source: PubMed Central journal article supplement — BMJ Open. 2022 Dec 16;12(12):e065425. doi: 10.1136/bmjopen-2022-065425 (PMC9764609; doi:10.1136/bmjopen-2022-065425), 2022-12-16
Supplement: bmjopen-2022-065425supp001.pdf [file bmjopen-2022-065425supp001.pdf]

## Supplementary material

**TITLE: Trends in body mass index, overweight and obesity among adults in the United States, the NHANES from 2003 through 2018: a repeat cross-sectional survey**

### AUTHORS:

1. Mingxi Li<sup>1&</sup> 2. Weijun Gong<sup>1&</sup> 3. Shidong Wang<sup>2</sup> 4. Zhe Li<sup>2</sup>

### AFFILIATIONS:

1. Beijing Rehabilitation Hospital, Capital Medical University, Xixiazhuang Badachu Road, Shijingshan District, 100144, Beijing, China
2. Dongzhimen Hospital, Beijing University of Chinese Medicine, No.5 Haiyuncang, Dongcheng District, 100700, Beijing, China

&These authors contributed equally to this work and should be considered co-first authors

**CONTACT INFO:** Corresponding Author: Zhe Li; Mailing address: No.5 Haiyuncang, Dongcheng District, 100700, Beijing, China; e-mail address: lizhetcm@126.com

For the annual change in mean BMI and annual relative change in the prevalence of obesity and overweight, the calculation formulas were as follows:

- Annual change in mean BMI (kg/m<sup>2</sup>):

$$\text{annual change} = \frac{(\text{level}_{t2} - \text{level}_{t1})}{(t2 - t1)} \frac{(\text{level}_{t2} - \text{level}_{t1})}{(t2 - t1)}$$

- Annual relative change in the prevalence of overweight and obesity:

$$\text{annual change} = \left( \frac{\text{level}_{t2}}{\text{level}_{t1}} \right)^{\frac{1}{t2 - t1}} - 1$$

**Table S1. Characteristics of participants according to BMI groups\***

| Characteristic              | Total<br>(n=42,266) | BMI, kg/m <sup>2</sup> † |                         |                    | p-value |
|-----------------------------|---------------------|--------------------------|-------------------------|--------------------|---------|
|                             |                     | < 25<br>(n=12,522)       | 25.0-29.9<br>(n=14,046) | ≥ 30<br>(n=1,5698) |         |
| Age, years                  | 47.11 ± 0.20        | 44.29 ± 0.30             | 48.78 ± 0.24            | 47.99 ± 0.22       | < 0.001 |
| Age, years, n (%)           |                     |                          |                         |                    | <0.001  |
| 20 - 30                     | 8,033 (20.54)       | 3,396 (29.24)            | 2,180 (16.73)           | 2,457 (16.63)      |         |
| 30 - 39                     | 7,175 (18.37)       | 2,104 (18.37)            | 2,334 (18.12)           | 2,737 (18.61)      |         |
| 40 - 49                     | 7,035 (19.43)       | 1,772 (16.64)            | 2,408 (20.50)           | 2,855 (20.84)      |         |
| 50 - 59                     | 6,714 (18.11)       | 1,675 (15.60)            | 2,224 (18.28)           | 2,815 (20.08)      |         |
| 60 - 69                     | 6,629 (12.76)       | 1,521 (9.62)             | 2,340 (13.84)           | 2,768 (14.43)      |         |
| ≥ 70                        | 6,680 (10.78)       | 2,054 (10.54)            | 2,560 (12.53)           | 2,066 (9.41)       |         |
| Sex, n (%)                  |                     |                          |                         |                    | < 0.001 |
| Male, n (%)                 | 20,408 (47.97)      | 5,784 (41.87)            | 7,773 (55.66)           | 6,851 (46.17)      |         |
| Female, n (%)               | 21,858 (52.03)      | 6,738 (58.13)            | 6,273 (44.34)           | 8,847 (53.83)      |         |
| Race, n (%)                 |                     |                          |                         |                    | < 0.001 |
| Mexican American            | 6,805 (8.38)        | 1,355 (5.61)             | 2,581 (9.35)            | 2,869 (9.86)       |         |
| Other Hispanic              | 3,755 (5.33)        | 917 (4.51)               | 1,412 (6.04)            | 1,426 (5.38)       |         |
| Non-Hispanic White          | 18,120 (67.36)      | 5,735 (69.30)            | 6,070 (67.90)           | 6,315 (65.24)      |         |
| Non-Hispanic Black          | 9,094 (11.41)       | 2,268 (9.24)             | 2,624 (9.82)            | 4,202 (14.70)      |         |
| Other Race                  | 4,492 (7.51)        | 2,247 (11.35)            | 1,359 (6.89)            | 886 (4.82)         |         |
| Education, n (%)            |                     |                          |                         |                    | < 0.001 |
| Less than high school       | 10,814 (16.4)       | 2,899 (15.19)            | 3,779 (16.79)           | 4,136 (16.95)      |         |
| High school graduate        | 9,787 (23.6)        | 2,747 (21.39)            | 3,200 (23.25)           | 3,840 (25.84)      |         |
| Some college or AA degree   | 12,266 (31.4)       | 3,409 (29.03)            | 3,860 (29.85)           | 4,997 (34.71)      |         |
| College graduate or above   | 9,345 (28.6)        | 3,441 (34.26)            | 3,194 (30.06)           | 2,710 (22.43)      |         |
| Poverty income ratio, n (%) |                     |                          |                         |                    | < 0.001 |
| < 130%                      | 12,129 (21.29)      | 3,588 (21.83)            | 3,802 (19.69)           | 4,739 (22.28)      |         |
| ≥ 130%                      | 26,450 (78.71)      | 7,863 (78.17)            | 8,944 (80.31)           | 9,643 (77.72)      |         |
| BMI, kg/m <sup>2</sup>      | 28.93 ± 0.07        | 22.20 ± 0.02             | 27.44 ± 0.02            | 35.98 ± 0.07       |         |
| Total energy intake, Kcal/d | 2,027.31 ± 7.96     | 2051.4 ± 12.7            | 2049.5 ± 12.8           | 1988.0 ± 11.1      | < 0.001 |
| Total energy intake, n (%)  |                     |                          |                         |                    | < 0.001 |
| Tertile1                    | 9,991 (25.36)       | 2,614 (24.87)            | 3,245 (23.89)           | 4,132 (27.06)      |         |
| Tertile2                    | 8,990 (27.08)       | 2,609 (26.89)            | 3,080 (28.30)           | 3,301 (26.16)      |         |
| Tertile3                    | 15,644 (47.56)      | 4,673 (48.24)            | 5,180 (47.81)           | 5,791 (46.79)      |         |
| Physical activity, n (%)    |                     |                          |                         |                    | < 0.001 |
| Inactive                    | 8,504 (18.09)       | 2,138 (14.52)            | 2,744 (16.99)           | 3,622 (22.15)      |         |
| Insufficiently active       | 6,649 (17.52)       | 1,995 (17.40)            | 2,232 (17.63)           | 2,422 (17.51)      |         |
| Sufficiently active         | 23,320 (64.39)      | 7,295 (68.09)            | 7,761 (65.38)           | 8,264 (60.34)      |         |

\* Data are presented incorporating sample weights and adjusted for clusters and strata

of the complex sample design of the National Health and Nutrition Examination

Survey (2003-2018).

† Values are presented as mean  $\pm$  SE for continuous variables and unweighted numbers (weighted %) for categorical variables.

Abbreviations: AA, Associate of Arts; BMI, body mass index

Table S2. Mean BMI over time among adults in the United States, 2003-2018 \*

| Characteristics       | BMI (weighted mean $\pm$ SE), kg/m <sup>2</sup> |                          |                               |                               |                               |                               |                               |                               |                               |
|-----------------------|-------------------------------------------------|--------------------------|-------------------------------|-------------------------------|-------------------------------|-------------------------------|-------------------------------|-------------------------------|-------------------------------|
|                       | Total<br>(n = 42,266)                           | 2003/2004<br>(n = 4,647) | 2005/2006<br>(n = 4,680)      | 2007/2008<br>(n = 5,607)      | 2009/2010<br>(n = 5,994)      | 2011/2012<br>(n = 5,237)      | 2013/2014<br>(n = 5,520)      | 2015/2016<br>(n = 5,406)      | 2017/2018<br>(n = 5,175)      |
| Overall               | 28.93 $\pm$ 0.07                                | 28.24 $\pm$ 0.15         | 28.57 $\pm$ 0.23              | 28.54 $\pm$ 0.16              | 28.75 $\pm$ 0.13              | 28.73 $\pm$ 0.21              | 29.17 $\pm$ 0.17              | 29.42 $\pm$ 0.25              | 29.86 $\pm$ 0.26              |
| Age, years            |                                                 |                          |                               |                               |                               |                               |                               |                               |                               |
| 20 - 30               | 27.54 $\pm$ 0.14                                | 26.93 $\pm$ 0.21         | 27.22 $\pm$ 0.34              | 27.40 $\pm$ 0.45              | 27.18 $\pm$ 0.30              | 27.35 $\pm$ 0.38 <sup>†</sup> | 27.78 $\pm$ 0.42 <sup>†</sup> | 28.89 $\pm$ 0.39 <sup>‡</sup> | 28.44 $\pm$ 0.55 <sup>‡</sup> |
| 30 - 39               | 29.16 $\pm$ 0.13                                | 28.18 $\pm$ 0.37         | 28.28 $\pm$ 0.36              | 28.71 $\pm$ 0.28              | 29.42 $\pm$ 0.32              | 28.72 $\pm$ 0.33              | 29.59 $\pm$ 0.35 <sup>†</sup> | 29.81 $\pm$ 0.31 <sup>‡</sup> | 30.52 $\pm$ 0.48 <sup>‡</sup> |
| 40 - 49               | 29.53 $\pm$ 0.13                                | 28.98 $\pm$ 0.28         | 29.41 $\pm$ 0.32              | 28.79 $\pm$ 0.27              | 28.86 $\pm$ 0.22              | 29.45 $\pm$ 0.35              | 29.80 $\pm$ 0.42              | 30.09 $\pm$ 0.52 <sup>†</sup> | 31.08 $\pm$ 0.36 <sup>‡</sup> |
| 50 - 59               | 29.61 $\pm$ 0.14                                | 29.01 $\pm$ 0.41         | 29.86 $\pm$ 0.43 <sup>†</sup> | 29.31 $\pm$ 0.42              | 29.16 $\pm$ 0.24              | 29.65 $\pm$ 0.51              | 29.79 $\pm$ 0.31 <sup>†</sup> | 29.77 $\pm$ 0.40              | 30.15 $\pm$ 0.32 <sup>‡</sup> |
| 60 - 69               | 29.66 $\pm$ 0.13                                | 29.08 $\pm$ 0.23         | 29.25 $\pm$ 0.29              | 29.21 $\pm$ 0.33              | 30.00 $\pm$ 0.29              | 29.15 $\pm$ 0.40              | 29.83 $\pm$ 0.32              | 30.52 $\pm$ 0.40 <sup>†</sup> | 29.76 $\pm$ 0.46              |
| $\geq$ 70             | 28.16 $\pm$ 0.10                                | 27.38 $\pm$ 0.23         | 27.34 $\pm$ 0.25              | 27.95 $\pm$ 0.25 <sup>†</sup> | 28.39 $\pm$ 0.22 <sup>‡</sup> | 27.94 $\pm$ 0.31 <sup>‡</sup> | 28.15 $\pm$ 0.24 <sup>‡</sup> | 28.56 $\pm$ 0.35 <sup>‡</sup> | 29.18 $\pm$ 0.26 <sup>‡</sup> |
| Sex                   |                                                 |                          |                               |                               |                               |                               |                               |                               |                               |
| Male                  | 28.79 $\pm$ 0.08                                | 28.14 $\pm$ 0.13         | 28.59 $\pm$ 0.25              | 28.47 $\pm$ 0.16              | 28.71 $\pm$ 0.21              | 28.53 $\pm$ 0.23              | 28.85 $\pm$ 0.15              | 29.14 $\pm$ 0.26 <sup>‡</sup> | 29.75 $\pm$ 0.27 <sup>‡</sup> |
| Female                | 29.07 $\pm$ 0.09                                | 28.32 $\pm$ 0.24         | 28.56 $\pm$ 0.28              | 28.61 $\pm$ 0.20              | 28.78 $\pm$ 0.14 <sup>†</sup> | 28.92 $\pm$ 0.23 <sup>‡</sup> | 29.47 $\pm$ 0.26 <sup>‡</sup> | 29.68 $\pm$ 0.29 <sup>‡</sup> | 29.96 $\pm$ 0.37 <sup>‡</sup> |
| Race                  |                                                 |                          |                               |                               |                               |                               |                               |                               |                               |
| Mexican American      | 29.96 $\pm$ 0.13                                | 28.91 $\pm$ 0.39         | 28.73 $\pm$ 0.22              | 29.40 $\pm$ 0.31              | 29.51 $\pm$ 0.27              | 29.89 $\pm$ 0.38              | 30.47 $\pm$ 0.24 <sup>‡</sup> | 31.05 $\pm$ 0.33 <sup>‡</sup> | 31.15 $\pm$ 0.35 <sup>‡</sup> |
| Other Hispanic        | 29.05 $\pm$ 0.15                                | 27.97 $\pm$ 0.64         | 28.60 $\pm$ 0.51              | 29.00 $\pm$ 0.41              | 28.68 $\pm$ 0.41              | 29.04 $\pm$ 0.31 <sup>‡</sup> | 28.84 $\pm$ 0.50              | 30.03 $\pm$ 0.40 <sup>‡</sup> | 29.28 $\pm$ 0.33 <sup>‡</sup> |
| Non-Hispanic White    | 28.73 $\pm$ 0.09                                | 28.01 $\pm$ 0.18         | 28.38 $\pm$ 0.25              | 28.37 $\pm$ 0.26              | 28.53 $\pm$ 0.16 <sup>‡</sup> | 28.51 $\pm$ 0.28 <sup>‡</sup> | 29.07 $\pm$ 0.19 <sup>‡</sup> | 29.27 $\pm$ 0.26 <sup>‡</sup> | 29.75 $\pm$ 0.35 <sup>‡</sup> |
| Non-Hispanic Black    | 30.72 $\pm$ 0.11                                | 30.34 $\pm$ 0.31         | 30.45 $\pm$ 0.28              | 30.18 $\pm$ 0.30              | 31.11 $\pm$ 0.35              | 30.85 $\pm$ 0.28              | 30.77 $\pm$ 0.31              | 30.61 $\pm$ 0.34              | 31.29 $\pm$ 0.29 <sup>†</sup> |
| Other race            | 26.77 $\pm$ 0.16                                | 26.15 $\pm$ 0.52         | 26.84 $\pm$ 0.65              | 26.00 $\pm$ 0.55              | 26.19 $\pm$ 0.39              | 26.12 $\pm$ 0.41              | 26.43 $\pm$ 0.36              | 27.13 $\pm$ 0.42              | 28.21 $\pm$ 0.39 <sup>‡</sup> |
| Education             |                                                 |                          |                               |                               |                               |                               |                               |                               |                               |
| Less than high school | 29.09 $\pm$ 0.09                                | 28.37 $\pm$ 0.32         | 28.66 $\pm$ 0.16              | 29.01 $\pm$ 0.25              | 29.30 $\pm$ 0.22 <sup>‡</sup> | 29.11 $\pm$ 0.28 <sup>‡</sup> | 29.25 $\pm$ 0.21 <sup>‡</sup> | 29.60 $\pm$ 0.29 <sup>‡</sup> | 29.58 $\pm$ 0.37 <sup>‡</sup> |
| High school graduate  | 29.47 $\pm$ 0.10                                | 28.67 $\pm$ 0.20         | 29.15 $\pm$ 0.27              | 28.92 $\pm$ 0.29              | 29.18 $\pm$ 0.20 <sup>†</sup> | 29.66 $\pm$ 0.37 <sup>†</sup> | 29.81 $\pm$ 0.33 <sup>‡</sup> | 30.03 $\pm$ 0.38 <sup>‡</sup> | 30.31 $\pm$ 0.18 <sup>‡</sup> |

|                           |              |              |                           |                           |                           |                           |                           |                           |                           |
|---------------------------|--------------|--------------|---------------------------|---------------------------|---------------------------|---------------------------|---------------------------|---------------------------|---------------------------|
| Some college or AA degree | 29.51 ± 0.10 | 28.45 ± 0.22 | 29.07 ± 0.29              | 28.88 ± 0.25              | 29.27 ± 0.17 <sup>†</sup> | 29.12 ± 0.28 <sup>†</sup> | 30.12 ± 0.27 <sup>‡</sup> | 30.11 ± 0.33 <sup>‡</sup> | 30.70 ± 0.32 <sup>‡</sup> |
| College graduate or above | 27.78 ± 0.11 | 27.34 ± 0.33 | 27.38 ± 0.37              | 27.40 ± 0.28              | 27.47 ± 0.30              | 27.56 ± 0.34 <sup>†</sup> | 27.65 ± 0.20 <sup>†</sup> | 28.27 ± 0.26 <sup>‡</sup> | 28.72 ± 0.43 <sup>‡</sup> |
| Poverty income ratio      |              |              |                           |                           |                           |                           |                           |                           |                           |
| < 130%                    | 28.14 ± 0.22 | 28.14 ± 0.22 | 28.89 ± 0.31 <sup>†</sup> | 28.87 ± 0.28 <sup>†</sup> | 29.30 ± 0.34 <sup>‡</sup> | 29.09 ± 0.21 <sup>‡</sup> | 29.44 ± 0.21 <sup>‡</sup> | 30.03 ± 0.32 <sup>‡</sup> | 29.92 ± 0.39 <sup>‡</sup> |
| ≥ 130%                    | 28.25 ± 0.15 | 28.25 ± 0.15 | 28.54 ± 0.24              | 28.52 ± 0.16              | 28.65 ± 0.15 <sup>†</sup> | 28.64 ± 0.26 <sup>‡</sup> | 29.14 ± 0.23 <sup>‡</sup> | 29.34 ± 0.27 <sup>‡</sup> | 28.24 ± 0.15 <sup>‡</sup> |
| Physical activity         |              |              |                           |                           |                           |                           |                           |                           |                           |
| Inactive                  | 28.53 ± 0.09 | 28.87 ± 0.72 | 29.48 ± 0.82              | 29.86 ± 0.21              | 30.36 ± 0.21              | 27.16 ± 0.35 <sup>†</sup> | 30.83 ± 0.30 <sup>†</sup> | 30.72 ± 0.33 <sup>†</sup> | 30.63 ± 0.39 <sup>†</sup> |
| Insufficiently active     | 28.98 ± 0.12 | 28.55 ± 0.20 | 28.61 ± 0.28              | 29.13 ± 0.34              | 28.91 ± 0.21              | 27.17 ± 0.38 <sup>‡</sup> | 29.15 ± 0.32              | 30.46 ± 0.58 <sup>‡</sup> | 31.04 ± 0.42 <sup>‡</sup> |
| Sufficiently active       | 28.53 ± 0.09 | 27.16 ± 0.23 | 27.68 ± 0.27              | 27.94 ± 0.20 <sup>†</sup> | 28.10 ± 0.18 <sup>‡</sup> | 29.06 ± 0.22 <sup>‡</sup> | 28.49 ± 0.17 <sup>‡</sup> | 28.83 ± 0.25 <sup>‡</sup> | 29.42 ± 0.29 <sup>‡</sup> |
| Total energy intake       |              |              |                           |                           |                           |                           |                           |                           |                           |
| Tetile 1                  | 29.30 ± 0.11 | 28.51 ± 0.19 | 29.21 ± 0.30              | 28.66 ± 0.24              | 29.37 ± 0.25 <sup>‡</sup> | 29.04 ± 0.31 <sup>†</sup> | 29.58 ± 0.34 <sup>‡</sup> | 29.83 ± 0.33 <sup>‡</sup> | 29.91 ± 0.35 <sup>‡</sup> |
| Tetile 2                  | 28.95 ± 0.11 | 27.94 ± 0.22 | 28.78 ± 0.26 <sup>‡</sup> | 28.49 ± 0.27 <sup>‡</sup> | 28.81 ± 0.23 <sup>‡</sup> | 28.92 ± 0.23 <sup>‡</sup> | 29.25 ± 0.34 <sup>‡</sup> | 29.31 ± 0.34 <sup>‡</sup> | 29.98 ± 0.45 <sup>‡</sup> |
| Tetile 3                  | 28.97 ± 0.10 | 28.53 ± 0.29 | 28.37 ± 0.36              | 28.72 ± 0.19              | 28.52 ± 0.24              | 28.84 ± 0.34 <sup>†</sup> | 29.14 ± 0.22 <sup>†</sup> | 29.65 ± 0.23 <sup>‡</sup> | 29.96 ± 0.27 <sup>‡</sup> |

\* Data are presented incorporating sample weights and adjusted for clusters and strata of the complex sample design of the National Health and Nutrition Examination Survey

(2003–2018). (<sup>†</sup> p < 0.05; <sup>‡</sup> p < 0.01)

Abbreviations: AA, Associate of Arts; BMI, body mass index; CI, confidence interval.

Table S3. Prevalence of obesity over time among adults in the United States, 2003-2018 \*

| Characteristics       | Prevalence (95CI),%  |                          |                          |                          |                          |                          |                          |                          |                          |
|-----------------------|----------------------|--------------------------|--------------------------|--------------------------|--------------------------|--------------------------|--------------------------|--------------------------|--------------------------|
|                       | Total<br>(n= 42,266) | 2003/2004<br>(n = 4,647) | 2005/2006<br>(n = 4,680) | 2007/2008<br>(n = 5,607) | 2009/2010<br>(n = 5,994) | 2011/2012<br>(n = 5,237) | 2013/2014<br>(n = 5,520) | 2015/2016<br>(n = 5,406) | 2017/2018<br>(n = 5,175) |
| Overall               | 36.7 (35.7, 37.6)    | 32.3 (29.9, 34.6)        | 34.4 (31.6, 37.2)        | 33.7 (31.5, 35.9)        | 35.8 (34.0, 37.7)        | 35.2 (32.4, 37.9)        | 37.9 (36.2, 39.6)        | 40.0 (37.0, 43.0)        | 42.8 (39.5, 46.1)        |
| Age, years            |                      |                          |                          |                          |                          |                          |                          |                          |                          |
| < 30                  | 29.6 (27.9, 31.4)    | 26.1 (23.1, 29.0)        | 27.7 (22.7, 32.6)        | 27.4 (21.6, 33.2)        | 27.7 (24.0, 31.4)        | 29.0 (23.9, 34.1)        | 29.5 (25.8, 33.1)        | 31.7 (26.7, 36.7) ‡      | 37.5 (30.2, 44.8) ‡      |
| 30 - 39               | 37.1 (35.5, 38.7)    | 32.5 (27.6, 37.5)        | 31.1 (26.6, 35.6)        | 35.5 (30.5, 39.7)        | 39.7 (35.4, 44.1) †      | 33.5 (30.2, 36.9)        | 39.9 (35.9, 43.9) †      | 40.5 (37.0, 44.1) †      | 44.3 (38.8, 49.9) ‡      |
| 40 - 49               | 39.3 (37.7, 40.9)    | 36.7 (34.2, 39.2)        | 39.0 (34.4, 43.6)        | 33.7 (29.4, 38.1)        | 36.2 (33.0, 39.5)        | 38.8 (33.4, 44.2)        | 41.1 (35.7, 46.5)        | 44.0 (38.1, 49.8) †      | 46.3 (41.7, 51.0) ‡      |
| 50 - 59               | 40.5 (38.6, 42.4)    | 35.9 (29.6, 42.1)        | 43.2 (38.6, 47.7)        | 38.1 (32.5, 43.6)        | 37.2 (33.8, 40.5)        | 39.5 (33.2, 45.9)        | 41.7 (37.1, 46.3)        | 42.7 (35.8, 49.6)        | 44.9 (40.7, 49.1) ‡      |
| 60 - 69               | 41.6 (39.6, 43.6)    | 35.7 (32.1, 39.3)        | 38.7 (34.1, 43.3)        | 38.6 (34.4, 42.8)        | 43.8 (39.7, 48.0) ‡      | 39.5 (34.5, 44.6) ‡      | 42.9 (38.9, 46.9) †      | 46.0 (40.3, 51.6) ‡      | 43.3 (35.3, 51.4) †      |
| ≥ 70                  | 32.2 (30.7, 33.6)    | 26.2 (22.4, 30.0)        | 25.8 (21.4, 30.2)        | 30.9 (27.0, 34.8) †      | 33.4 (30.0, 36.8) ‡      | 29.5 (26.4, 32.7) ‡      | 32.7 (28.4, 37.0) ‡      | 35.5 (30.9, 40.1) ‡      | 40.3 (36.0, 44.6) ‡      |
| Sex                   |                      |                          |                          |                          |                          |                          |                          |                          |                          |
| Men                   | 35.3 (34.1, 36.6)    | 30.9 (28.4, 33.4)        | 33.0 (28.9, 37.1)        | 32.0 (29.1, 34.8)        | 35.3 (31.9, 38.7) †      | 33.8 (31.2, 36.4)        | 35.2 (33.2, 37.2) ‡      | 38.1 (33.9, 42.3) ‡      | 43.3 (38.2, 48.4) ‡      |
| Women                 | 37.9 (36.8, 38.9)    | 33.6 (30.3, 36.8)        | 35.6 (33.0, 38.3)        | 35.3 (33.0, 37.6)        | 36.3 (34.5, 38.1) †      | 36.4 (33.0, 39.8) ‡      | 40.4, 37.9, 43.0) ‡      | 41.7 (38.7, 44.7) ‡      | 42.3 (38.6, 46.0) ‡      |
| Race                  |                      |                          |                          |                          |                          |                          |                          |                          |                          |
| Mexican American      | 43.1 (41.5, 44.8)    | 36.3 (31.2, 41.4)        | 33.3 (31.6, 35.1)        | 39.2 (32.2, 46.2)        | 38.9 (36.4, 43.4)        | 45.2 (40.7, 49.7) ‡      | 46.7 (42.5, 51.0) ‡      | 49.0 (45.6, 52.4) ‡      | 51.6 (47.5, 55.8) ‡      |
| Other Hispanic        | 37.0 (35.0, 39.1)    | 29.5 (19.2, 39.8)        | 34.2 (26.6, 41.9)        | 34.9 (30.3, 39.6)        | 34.7 (28.8, 40.6)        | 38.1 (32.7, 43.6) ‡      | 36.9 (31.2, 42.6) †      | 44.2 (38.4, 49.9) ‡      | 37.0 (42.7, 41.2) ‡      |
| Non-Hispanic White    | 35.5 (34.4, 36.6)    | 31.0 (28.5, 33.4)        | 33.3 (30.2, 36.5)        | 32.6 (29.2, 36.0)        | 34.7 (32.4, 37.1) ‡      | 33.4 (29.9, 37.0) ‡      | 37.0 (35.0, 39.1) ‡      | 38.9 (35.7, 42.1) ‡      | 43.0 (38.2, 47.7) ‡      |
| Non-Hispanic Black    | 47.1 (45.7, 48.5)    | 45.2 (40.9, 49.4)        | 45.4 (42.0, 48.8)        | 43.6 (39.6, 47.5)        | 49.9 (45.1, 54.7)        | 47.8 (44.3, 51.2)        | 47.9 (43.8, 52.1)        | 46.8 (42.5, 51.1)        | 49.8 (46.9, 52.7)        |
| Other race            | 23.7 (21.4, 25.9)    | 19.0 (9.9, 28.0)         | 26.4 (17.6, 35.2)        | 19.4 (9.9, 29.0)         | 19.7 (15.4, 24.0)        | 18.8 (13.9, 23.8)        | 21.4 (16.7, 26.0)        | 28.0 (21.3, 36.7)        | 30.6 (25.5, 35.7) †      |
| Education             |                      |                          |                          |                          |                          |                          |                          |                          |                          |
| Less than high school | 37.9 (36.7, 39.2)    | 34.3 (30.0, 38.5)        | 35.7 (33.3, 38.1)        | 37.6 (33.1, 42.0)        | 37.6 (34.9, 40.3) †      | 37.7 (35.1, 40.4) †      | 40.6 (37.5, 43.6)        | 40.3 (36.3, 43.7) ‡      | 41.4 (37.3, 45.6) †      |
| High school graduate  | 40.0 (38.5, 41.4)    | 34.3 (30.5, 38.1)        | 38.9 (35.1, 42.6)        | 35.0 (31.6, 38.4)        | 38.3 (34.6, 42.0)        | 40.3 (35.3, 45.5) †      | 41.3 (37.0, 45.7) ‡      | 43.7 (38.6, 48.9) ‡      | 47.2 (43.2, 51.2) ‡      |

|                           |                   |                   |                    |                    |                    |                    |                    |                    |                    |
|---------------------------|-------------------|-------------------|--------------------|--------------------|--------------------|--------------------|--------------------|--------------------|--------------------|
| Some college or AA degree | 40.7 (39.4, 41.9) | 33.9 (30.4, 37.4) | 36.8 (32.9, 40.7)  | 37.5 (34.4, 40.6)  | 40.6 (38.3, 42.9)‡ | 38.0 (34.0, 41.9)† | 42.9 (40.1, 45.7)‡ | 46.0 (42.2, 49.8)‡ | 47.7 (43.8, 51.5)‡ |
| College graduate or above | 28.8 (27.2, 30.4) | 26.3 (22.0, 30.7) | 26.2 (21.9, 30.5)  | 24.9 (20.9, 28.9)  | 27.5 (23.7, 31.4)  | 27.6 (22.5, 32.8)  | 28.7 (26.2, 31.3)† | 31.5 (27.5, 35.4)‡ | 34.7 (29.1, 40.2)‡ |
| Poverty income ratio      |                   |                   |                    |                    |                    |                    |                    |                    |                    |
| < 130%                    | 38.4 (37.2, 39.6) | 32.3 (29.7, 34.6) | 36.3 (33.1, 39.6)‡ | 35.9 (32.1, 39.7)† | 38.4 (34.8, 41.9)‡ | 38.0 (35.5, 40.6)‡ | 39.4 (36.9, 41.8)‡ | 42.0 (38.1, 45.9)‡ | 43.8 (39.7, 47.9)‡ |
| ≥ 130%                    | 36.4 (35.3, 37.4) | 32.3 (29.6, 34.9) | 34.3 (31.0, 37.6)  | 33.1 (30.9, 35.4)  | 35.7 (33.4, 37.9)† | 34.3 (31.0, 37.6)† | 37.6 (35.3, 40.0)‡ | 39.8 (36.3, 43.2)‡ | 43.1 (39.6, 46.7)‡ |
| Physical activity         |                   |                   |                    |                    |                    |                    |                    |                    |                    |
| Inactive                  | 44.8 (43.4, 46.2) | 38.0 (30.4, 45.6) | 41.7 (29.5, 53.9)  | 42.6 (39.7, 45.4)  | 44.4 (42.4, 46.4)  | 26.2 (20.0, 32.3)† | 48.5 (44.9, 52.1)† | 48.0 (44.5, 51.5)† | 46.7 (43.1, 50.4)† |
| Insufficiently active     | 36.4 (34.8, 38.0) | 33.7 (30.6, 36.7) | 34.0 (30.8, 37.3)  | 36.3 (31.1, 41.4)  | 37.3 (33.0, 41.6)  | 27.4 (22.0, 32.8)† | 36.9 (33.6, 40.1)  | 44.5 (37.2, 51.8)‡ | 48.3 (41.7, 54.9)‡ |
| Sufficiently active       | 34.3 (33.2, 35.4) | 24.8 (21.5, 28.2) | 29.1 (24.9, 33.4)  | 30.0 (27.5, 32.5)† | 32.3 (29.7, 34.9)‡ | 36.9 (34.2, 39.5)‡ | 33.7 (31.9, 35.5)‡ | 36.6 (33.4, 39.7)‡ | 40.6 (36.7, 44.6)‡ |
| Total energy intake       |                   |                   |                    |                    |                    |                    |                    |                    |                    |
| Tetile 1                  | 39.9 (38.4, 41.3) | 34.5 (32.2, 36.8) | 38.2 (34.8, 41.7)  | 36.1 (33.1, 39.0)  | 39.3 (36.1, 42.5)‡ | 38.5 (33.6, 43.4)  | 40.8 (36.2, 45.3)‡ | 43.4 (39.2, 47.6)‡ | 46.1 (41.4, 50.8)‡ |
| Tetile 2                  | 36.0 (34.5, 37.6) | 30.1 (26.7, 33.4) | 35.8 (31.7, 39.8)† | 32.1 (28.5, 35.7)  | 36.1 (32.8, 39.4)† | 34.7 (31.4, 38.1)‡ | 38.0 (33.4, 42.7)‡ | 37.9 (33.2, 42.7)‡ | 43.3 (37.1, 49.4)‡ |
| Tetile 3                  | 36.7 (35.5, 38.0) | 33.9 (29.9, 37.8) | 32.6 (28.4, 36.9)  | 34.8 (32.0, 37.6)  | 35.0 (31.6, 38.4)  | 35.4 (31.6, 39.3)† | 37.5 (34.8, 40.2)† | 41.3 (37.6, 45.1)‡ | 43.3 (39.4, 47.2)‡ |

\* Data are presented incorporating sample weights and adjusted for clusters and strata of the complex sample design of the National Health and Nutrition Examination Survey

(2003–2018). (†  $p < 0.05$ ; ‡  $p < 0.01$ )

Abbreviations: AA, Associate of Arts; BMI, body mass index; CI, confidence interval.

Table S4. Prevalence of overweight over time among adults in the United States, 2003-2018 \*

| Characteristics       | Prevalence (95CI),%  |                          |                          |                          |                                 |                                |                                |                                |                                |
|-----------------------|----------------------|--------------------------|--------------------------|--------------------------|---------------------------------|--------------------------------|--------------------------------|--------------------------------|--------------------------------|
|                       | Total<br>(n= 42,266) | 2003/2004<br>(n = 4,647) | 2005/2006<br>(n = 4,680) | 2007/2008<br>(n = 5,607) | 2009/2010<br>(n = 5,994)        | 2011/2012<br>(n = 5,237)       | 2013/2014<br>(n = 5,520)       | 2015/2016<br>(n = 5,406)       | 2017/2018<br>(n = 5,175)       |
| Overall               | 69.6 (68.7, 70.5)    | 66.3 (64.4, 68.3)        | 67.2 (64.6, 69.8)        | 68.0 (66.2, 69.8)        | 69.2 (66.6, 71.7)               | 69.1 (65.9, 72.3)              | 70.7 (69.0, 72.3)              | 71.8 (68.9, 74.8)              | 73.8 (71.1, 76.4)              |
| Age, years            |                      |                          |                          |                          |                                 |                                |                                |                                |                                |
| 20 - 30               | 56.6 (54.7, 58.5)    | 53.4 (49.1, 57.6)        | 56.4 (51.9, 60.8)        | 55.2 (51.1, 59.3)        | 56.7 (50.7, 62.7)               | 54.9 (47.4, 62.3)              | 56.6 (52.4, 60.9)              | 59.7 (55.3, 64.1) <sup>†</sup> | 59.4 (53.2, 65.5) <sup>†</sup> |
| 30 - 39               | 69.8 (68.1, 71.4)    | 63.0 (57.7, 68.4)        | 64.6 (59.1, 70.0)        | 69.3 (65.9, 72.8)        | 70.7 ( 67.0, 74.5) <sup>†</sup> | 68.6 (64.4, 72.7)              | 72.3 (68.2, 76.3) <sup>‡</sup> | 73.2 (69.5, 76.8) <sup>‡</sup> | 76.2 (70.6, 81.8) <sup>‡</sup> |
| 40 - 49               | 74.0 (72.4, 75.5)    | 73.9 (69.2, 78.6)        | 70.2 (66.2, 74.2)        | 71.4 (67.6, 75.3)        | 69.6 (66.4, 72.9)               | 75.9 (71.7, 80.1)              | 76.6 (73.0, 80.2)              | 73.9 (68.7, 79.0)              | 80.9 (75.5, 86.3)              |
| 50 - 59               | 74.0 (72.4, 75.6)    | 71.1 (66.7, 75.5)        | 75.5 (91.0, 79.9)        | 71.9 (66.7, 77.1)        | 74.3 (70.0, 78.5)               | 75.2 (70.6, 79.8)              | 74.6 (72.2, 77.0)              | 74.1 (69.6, 78.7)              | 74.8 (69.3, 80.4)              |
| 60 - 69               | 77.1 (75.4, 78.8)    | 76.7 (73.4, 80.1)        | 76.7 (71.7, 81.6)        | 75.5 (71.4, 79.6)        | 78.6 (74.7, 82.5)               | 74.4 (68.3, 80.6)              | 76.0 (72.5, 79.5)              | 80.1 (74.5, 85.7)              | 78.1 (73.6, 82.5)              |
| ≥ 70                  | 70.2 (68.9, 71.4)    | 65.6 (61.0, 70.2)        | 63.9 (60.4, 67.4)        | 69.1 (65.8, 72.4)        | 71.0 (68.2, 73.8) <sup>†</sup>  | 67.4 (63.8, 70.9) <sup>†</sup> | 70.8 (68.2, 73.4) <sup>†</sup> | 73.8 (70.2, 77.4) <sup>‡</sup> | 77.1 (73.5, 80.7) <sup>‡</sup> |
| Sex                   |                      |                          |                          |                          |                                 |                                |                                |                                |                                |
| Male                  | 73.5 (72.5, 75.6)    | 70.6 (68.0, 73.0)        | 73.2 (70.3, 76.2)        | 71.9 (70.1, 73.7)        | 74.0 (70.4, 77.6)               | 71.8 (68.6, 75.0)              | 74.0 (71.9, 76.1) <sup>†</sup> | 74.9 (72.0, 77.8) <sup>†</sup> | 77.4 (73.9, 80.9) <sup>‡</sup> |
| Female                | 66.0 (64.9, 67.1)    | 62.5 (59.9, 65.9)        | 61.6 (58.3, 64.8)        | 64.4 (61.7, 67.1)        | 64.7 (62.3, 67.1)               | 66.6 (63.0, 70.2) <sup>‡</sup> | 67.6 (65.2, 70.0) <sup>‡</sup> | 69.0 (65.4, 72.6) <sup>‡</sup> | 70.5 (67.3, 73.6) <sup>‡</sup> |
| Race                  |                      |                          |                          |                          |                                 |                                |                                |                                |                                |
| Mexican American      | 79.7 (78.1, 81.2)    | 73.8 (67.8, 79.8)        | 73.4 (69.8, 77.0)        | 77.3 (73.3, 81.2)        | 79.9 (76.5, 83.3)               | 78.6 (72.7, 84.5)              | 83.2 (80.1, 86.3) <sup>†</sup> | 82.8 (78.9, 86.8) <sup>‡</sup> | 85.3 (80.8, 89.9) <sup>‡</sup> |
| Other Hispanic        | 74.6 (72.9, 76.3)    | 68.4 (58.1, 78.7)        | 70.5 (62.3, 78.8)        | 74.8 (69.5, 80.1)        | 72.2 (69.4, 75.1)               | 75.2 (71.8, 78.7)              | 70.0 (64.7, 75.2)              | 78.5 (74.8, 82.2)              | 80.0 (76.0, 84.1) <sup>†</sup> |
| Non-Hispanic White    | 68.7 (67.7, 69.8)    | 65.2 (62.3, 68.0)        | 66.1 (62.8, 69.4)        | 67.2 (64.6, 69.9)        | 68.1 (65.0, 71.2)               | 68.7 (64.9, 72.5) <sup>†</sup> | 70.6 (69.0, 72.2) <sup>†</sup> | 71.5 (68.6, 74.3) <sup>†</sup> | 72.2 (68.6, 75.8) <sup>‡</sup> |
| Non-Hispanic Black    | 75.5 (74.4, 76.6)    | 75.8 (72.8, 78.7)        | 75.5 (72.0, 79.1)        | 73.0 (70.6, 75.4)        | 76.4 (73.3, 79.5)               | 76.2 (73.0, 79.4)              | 75.5 (72.2, 78.7)              | 75.0 (71.8, 78.1)              | 76.4 (73.6, 79.1)              |
| Other race            | 54.1 (51.9, 56.3)    | 50.4 (42.2, 58.6)        | 51.0 (40.9, 61.0)        | 49.2 (41.9, 56.5)        | 53.0 (45.8, 60.1)               | 47.3 (43.5, 51.1)              | 50.1 (44.3, 56.0)              | 55.8 (50.6, 61.0)              | 66.5 (63.1, 70.0) <sup>‡</sup> |
| Education             |                      |                          |                          |                          |                                 |                                |                                |                                |                                |
| Less than high school | 71.8 (70.4, 73.2)    | 66.9 (61.8, 72.0)        | 67.8 (64.6, 71.0)        | 71.3 (68.5, 74.1)        | 75.0 (70.9, 79.1) <sup>‡</sup>  | 71.7 (67.7, 75.7)              | 73.7 (70.9, 76.4) <sup>†</sup> | 73.8 (69.1, 78.6) <sup>†</sup> | 74.7 (71.4, 78.0) <sup>‡</sup> |



|                           |                   |                   |                                |                                |                                |                                |                                |                                |                                |
|---------------------------|-------------------|-------------------|--------------------------------|--------------------------------|--------------------------------|--------------------------------|--------------------------------|--------------------------------|--------------------------------|
| High school graduate      | 72.4 (71.2, 73.6) | 69.5 (67.4, 71.6) | 70.0 (66.3, 73.7)              | 69.9 (66.8, 72.9)              | 71.3 (68.3, 74.4)              | 73.1 (68.1, 78.1)              | 73.6 (70.5, 76.8) <sup>†</sup> | 77.3 (73.4, 81.2) <sup>‡</sup> | 74.7 (71.6, 77.8) <sup>‡</sup> |
| Some college or AA degree | 71.9 (70.7, 73.1) | 68.1 (64.8, 71.3) | 70.1 (66.8, 73.4)              | 69.0 (66.2, 71.8)              | 70.2 (66.6, 73.8)              | 70.5 (65.8, 75.2)              | 74.4 (72.4, 76.5) <sup>‡</sup> | 74.7 (71.8, 77.6) <sup>‡</sup> | 76.9 (73.6, 80.1) <sup>‡</sup> |
| College graduate or above | 63.6 (62.0, 65.2) | 60.0 (55.0, 65.0) | 60.4 (55.2, 65.7)              | 62.3 (58.1, 66.5) <sup>‡</sup> | 62.6 (57.3, 68.0)              | 63.8 (58.6, 69.0) <sup>‡</sup> | 63.0 (59.7, 66.2) <sup>‡</sup> | 64.5 (60.2, 68.9) <sup>‡</sup> | 69.5 (65.0, 74.0) <sup>‡</sup> |
| Poverty income ratio      |                   |                   |                                |                                |                                |                                |                                |                                |                                |
| < 130%                    | 68.8 (67.4, 70.3) | 62.6 (59.1, 66.1) | 67.3 (63.1, 71.6) <sup>‡</sup> | 67.1 (63.9, 70.4) <sup>†</sup> | 71.1 (66.3, 75.8) <sup>‡</sup> | 68.4 (64.2, 72.7) <sup>‡</sup> | 69.1 (65.9, 72.4) <sup>‡</sup> | 72.6 (68.1, 77.2) <sup>‡</sup> | 71.0 (67.1, 74.9) <sup>‡</sup> |
| ≥ 130%                    | 69.9 (68.9, 70.9) | 67.3 (64.8, 69.8) | 67.2 (64.1, 70.4)              | 68.3 (66.5, 70.2)              | 68.8 (65.9, 71.6)              | 69.3 (65.6, 73.0)              | 71.3 (69.1, 73.6) <sup>†</sup> | 71.6 (68.2, 75.0) <sup>†</sup> | 74.9 (72.3, 77.4) <sup>‡</sup> |
| Physical activity         |                   |                   |                                |                                |                                |                                |                                |                                |                                |
| Inactive                  | 75.6 (74.3, 76.9) | 67.8 (59.4, 76.0) | 74.2 (66.0, 82.6)              | 71.7 (69.5, 74.0)              | 76.3 (73.4, 79.2)              | 63.2 (56.5, 69.9)              | 78.4 (75.4, 81.5) <sup>†</sup> | 77.6 (73.8, 81.4) <sup>†</sup> | 78.3 (75.4, 81.2) <sup>†</sup> |
| Insufficiently active     | 69.7 (68.1, 71.3) | 68.3 (66.1, 70.5) | 68.2 (63.6, 72.7)              | 69.4 (65.9, 73.0)              | 68.1 (64.1, 72.1)              | 59.6 (53.1, 66.1) <sup>†</sup> | 71.0 (66.0, 76.0)              | 76.0 (70.1, 81.8) <sup>†</sup> | 81.1 (77.8, 84.4) <sup>‡</sup> |
| Sufficiently active       | 67.9 (66.7, 69.1) | 60.9 (56.1, 65.7) | 62.0 (58.2, 65.7)              | 66.4 (63.9, 68.8)              | 66.7 (62.9, 70.4)              | 70.8 (67.6, 74.0) <sup>‡</sup> | 67.4 (65.4, 69.4) <sup>†</sup> | 69.3 (66.3, 72.2) <sup>‡</sup> | 71.1 (67.8, 74.5) <sup>‡</sup> |
| Total energy intake       |                   |                   |                                |                                |                                |                                |                                |                                |                                |
| Tetile 1                  | 70.9 (69.4, 72.3) | 66.9 (63.7, 70.1) | 68.1 (64.1, 72.0)              | 71.0 (67.4, 74.5)              | 69.7 (66.0, 73.3)              | 71.8 (66.7, 76.9)              | 72.9 (69.1, 76.7) <sup>‡</sup> | 73.9 (69.9, 77.9) <sup>‡</sup> | 71.7 (67.5, 75.8) <sup>‡</sup> |
| Tetile 2                  | 70.7 (69.3, 72.0) | 65.0 (61.8, 68.2) | 70.0 (66.3, 73.6) <sup>†</sup> | 68.2 (64.2, 72.1)              | 70.6 (66.7, 74.6) <sup>†</sup> | 71.5 (67.6, 75.3) <sup>†</sup> | 73.2 (69.6, 76.8) <sup>‡</sup> | 71.1 (66.6, 75.7) <sup>†</sup> | 75.4 (72.0, 78.9) <sup>‡</sup> |
| Tetile 3                  | 69.8 (68.7, 71.0) | 68.4 (64.9, 71.9) | 66.7 (63.0, 70.4)              | 68.7 (66.2, 71.3)              | 69.1 (65.0, 73.1)              | 68.2 (64.9, 71.4)              | 69.6 (66.9, 72.3)              | 73.1 (70.3, 75.8) <sup>†</sup> | 75.0 (71.4, 78.5) <sup>†</sup> |

\* Data are presented incorporating sample weights and adjusted for clusters and strata of the complex sample design of the National Health and Nutrition Examination Survey

(2003–2018). (<sup>†</sup> p < 0.05; <sup>‡</sup> p < 0.01)

Abbreviations: AA, Associate of Arts; BMI, body mass index; CI, confidence interval.

**Table S5. Change in mean BMI by sex among adults in the United States, 2003-****2018**

| Years       | Weighted mean BMI             |         |                               |         |                               |         |
|-------------|-------------------------------|---------|-------------------------------|---------|-------------------------------|---------|
|             | Men                           |         | Women                         |         | Both                          |         |
|             | Adjusted $\beta$ *<br>(95%CI) | p-value | Adjusted $\beta$ *<br>(95%CI) | p-value | Adjusted $\beta$ *<br>(95%CI) | p-value |
| 2003 - 2004 | Reference                     |         | Reference                     |         | Reference                     |         |
| 2005 - 2006 | 0.38 (-<br>0.29,1.06)         | 0.259   | 0.44 (-0.47, 1.35)            | 0.338   | 0.38 (-0.23,0.99)             | 0.215   |
| 2007 - 2008 | 0.42 (-<br>0.14,0.97)         | 0.139   | 0.52 (-0.10, 1.15)            | 0.102   | 0.48 (0.04,0.93)              | 0.035   |
| 2009 - 2010 | 0.72 (0.09,1.35)              | 0.025   | 0.64 (0.04, 1.23)             | 0.037   | 0.70 (0.26,1.15)              | 0.002   |
| 2011 - 2012 | 0.64 (0.04, 1.23)             | 0.035   | 1.50 (0.84, 2.16)             | <0.001  | 1.08 (0.55, 1.61)             | <0.001  |
| 2013 - 2014 | 0.73 (0.18, 1.28)             | 0.010   | 1.55 (0.78, 2.32)             | <0.001  | 1.18 (0.66, 1.70)             | <0.001  |
| 2015 - 2016 | 1.28 (0.62, 1.95)             | <0.001  | 1.88 (1.15, 2.61)             | <0.001  | 1.59 (1.03, 2.20)             | <0.001  |
| 2017 - 2018 | 1.62 (1.00, 2.24)             | <0.001  | 2.26 (1.30, 3.21)             | <0.001  | 1.96 (1.34, 2.57)             | <0.001  |
| P for trend |                               | <0.001  |                               | <0.001  |                               | <0.001  |

Abbreviations: CI, confidence interval.

\* Models adjusted for age, sex, race, education, family poverty income ratio, daily total energy intake and physical activity status.

**Table S6. Change in prevalence of obesity by sex among adults in the United****States, 2003-2018**

| Years       | Prevalence of obesity    |         |                          |         |                          |         |
|-------------|--------------------------|---------|--------------------------|---------|--------------------------|---------|
|             | Men                      |         | Women                    |         | Both                     |         |
|             | Adjusted OR *<br>(95%CI) | p-value | Adjusted OR *<br>(95%CI) | p-value | Adjusted OR *<br>(95%CI) | p-value |
| 2003 - 2004 | Reference                |         | Reference                |         | Reference                |         |
| 2005 - 2006 | 1.03 (0.96, 1.09)        | 0.402   | 1.04 (0.98, 1.09)        | 0.197   | 1.03 (0.99, 1.07)        | 0.184   |
| 2007 - 2008 | 1.03 (0.98, 1.08)        | 0.229   | 1.03 (0.99, 1.07)        | 0.193   | 1.03 (1.00, 1.06)        | 0.084   |
| 2009 - 2010 | 1.07 (1.02, 1.13)        | 0.008   | 1.04 (1.01, 1.08)        | 0.026   | 1.06 (1.03, 1.09)        | <0.001  |
| 2011 - 2012 | 1.06 (1.03, 1.11)        | 0.028   | 1.08 (1.04, 1.13)        | <0.001  | 1.07 (1.03, 1.11)        | <0.001  |
| 2013 - 2014 | 1.06 (1.01, 1.11)        | 0.011   | 1.08 (1.05, 1.14)        | <0.001  | 1.08 (1.04, 1.11)        | <0.001  |
| 2015 - 2016 | 1.11 (1.04, 1.18)        | <0.001  | 1.12 (1.07, 1.17)        | <0.001  | 1.11 (1.07, 1.16)        | <0.001  |
| 2017 - 2018 | 1.17 (1.09, 1.24)        | <0.001  | 1.14 (1.08, 1.21)        | <0.001  | 1.15 (1.10, 1.21)        | <0.001  |
| P for trend |                          | <0.001  |                          | <0.001  |                          | <0.001  |

Abbreviations: CI, confidence interval; OR, odds ratio.

Crude model: we did not adjust other covariants.

\* Models adjusted for age, sex, race, education, family poverty income ratio, daily total energy intake and physical activity status.

**Table S7. Change in prevalence of overweight by sex among adults in the United****States, 2003-2018**

| Years       | Prevalence of overweight |         |                          |         |                          |         |
|-------------|--------------------------|---------|--------------------------|---------|--------------------------|---------|
|             | Men                      |         | Women                    |         | Both                     |         |
|             | Adjusted OR *<br>(95%CI) | p-value | Adjusted OR *<br>(95%CI) | p-value | Adjusted OR *<br>(95%CI) | p-value |
| 2003 - 2004 | Reference                |         | Reference                |         | Reference                |         |
| 2005 - 2006 | 1.01 (0.96, 1.06)        | 0.580   | 1.01 (0.95, 1.08)        | 0.690   | 1.01 (0.97, 1.05)        | 0.598   |
| 2007 - 2008 | 1.00 (0.96, 1.05)        | 0.868   | 1.03 (0.98, 1.08)        | 0.206   | 1.02 (0.98, 1.05)        | 0.281   |
| 2009 - 2010 | 1.02 (0.97, 1.08)        | 0.406   | 1.03 (0.98, 1.08)        | 0.248   | 1.03 (0.99, 1.07)        | 0.178   |
| 2011 - 2012 | 1.01 (0.96, 1.06)        | 0.819   | 1.08 (1.03, 1.14)        | 0.002   | 1.05 (1.00, 1.09)        | 0.034   |
| 2013 - 2014 | 1.02 (0.98, 1.07)        | 0.370   | 1.07 (1.02, 1.12)        | 0.010   | 1.05 (1.01, 1.08)        | 0.012   |
| 2015 - 2016 | 1.03 (0.98, 1.08)        | 0.305   | 1.09 (1.04, 1.15)        | 0.001   | 1.06 (1.02, 1.10)        | 0.005   |
| 2017 - 2018 | 1.05 (1.00, 1.11)        | 0.050   | 1.11 (1.05, 1.17)        | <0.001  | 1.08 (1.04, 1.13)        | <0.001  |
| P for trend |                          | <0.001  |                          | <0.001  |                          | <0.001  |

Abbreviations: CI, confidence interval; OR, odds ratio.

\* Models adjusted for age, sex, race, education, family poverty income ratio, daily total energy intake and physical activity status.

**Table S8. Characteristics of participants according to tertiles of daily total energy intake\***

| Characteristic                 | Total<br>(n=34,625) | Daily total energy intake (Kcal/d) † |                       |                        | P-value |
|--------------------------------|---------------------|--------------------------------------|-----------------------|------------------------|---------|
|                                |                     | Tertile1<br>(n=9,991)                | Tertile2<br>(n=8,990) | Tertile3<br>(n=1,5644) |         |
| Age, years                     | 48.81 ± 0.48        | 49.57 ± 0.28                         | 48.23± 0.28           | 46.38 ± 0.25           | < 0.001 |
| Sex, n (%)                     |                     |                                      |                       |                        | < 0.001 |
| Male, n (%)                    | 16,457 (47.20)      | 3,159 (27.81)                        | 4,442 (48.79)         | 8,856 (56.63)          |         |
| Female, n (%)                  | 18,168 (52.80)      | 6,832 (72.19)                        | 4,548 (51.21)         | 6,788 (43.37)          |         |
| Race, n (%)                    |                     |                                      |                       |                        | < 0.001 |
| Mexican American               | 5,430 (7.85)        | 1,670 (8.43)                         | 1,383 (7.43)          | 2,377 (7.78)           |         |
| Other Hispanic                 | 2,973 (5.02)        | 1,049 (6.46)                         | 698 (4.33)            | 1,226 (4.65)           |         |
| Non-Hispanic White             | 15,635 (69.51)      | 3,905 (64.17)                        | 4,353 (72.29)         | 7,377 (70.77)          |         |
| Non-Hispanic Black             | 7,384 (10.97)       | 2,465 (13.87)                        | 1,759 (9.64)          | 3,160 (10.19)          |         |
| Other Race                     | 3,203 (6.64)        | 902.00 (7.06)                        | 797.00 (6.31)         | 1,504 (6.60)           |         |
| Education, n (%)               |                     |                                      |                       |                        | < 0.001 |
| Less than high school          | 8,224 (14.99)       | 3,085 (19.78)                        | 1,912(13.29)          | 3,227 (13.39)          |         |
| High school graduate           | 8,042 (23.55)       | 2,397 (25.76)                        | 2,051 (22.95)         | 3,594 (22.71)          |         |
| Some college or AA degree      | 10,281 (31.61)      | 2,727 (29.98)                        | 2,748 (32.51)         | 4,806 (31.98)          |         |
| College graduate or above      | 8,049 (29.80)       | 1,773 (24.41)                        | 2,272 (31.20)         | 4,004 (31.88)          |         |
| Poverty income ratio, n (%)    |                     |                                      |                       |                        | < 0.001 |
| < 130%                         | 9,588 (19.89)       | 3,157(24.23)                         | 2,335 (18.50)         | 4,096 (18.41)          |         |
| ≥ 130%                         | 22,370 (80.11)      | 5,931(75.77)                         | 5,972 (81.50)         | 10,467 (81.59)         |         |
| BMI, kg/m <sup>2</sup>         | 29.05 ±0.08         | 29.30±0.11                           | 28.95 ±0.11           | 28.97±0.10             |         |
| BMI, kg/m <sup>2</sup> (group) |                     |                                      |                       |                        | < 0.001 |
| < 25                           | 9,896 (30.04)       | 2,614 (29.47)                        | 2,609 (29.83)         | 4,673 (30.47)          |         |
| 25 - 30                        | 11,505 (32.91)      | 3,245 (31.00)                        | 3,080 (34.39)         | 5,180 (33.09)          |         |
| ≥ 30                           | 13,224 (37.04)      | 4,132 (39.53)                        | 3,301 (35.78)         | 5,791 (36.44)          |         |
| Overweight                     |                     |                                      |                       |                        | 0.3     |
| No                             | 9,788 (29.68)       | 2,583 (29.14)                        | 2,576 (29.33)         | 4,629 (30.16)          |         |
| Yes                            | 24,837 (70.32)      | 7,408 (70.86)                        | 6,414 (70.67)         | 11,015 (69.84)         |         |
| Obesity                        |                     |                                      |                       |                        | < 0.001 |
| No                             | 21,294 (62.65)      | 5,829 (60.14)                        | 5,660 (63.95)         | 9,805 (63.25)          |         |
| Yes                            | 13,331 (37.35)      | 4,162 (39.86)                        | 3,330 (36.05)         | 5,839 (36.75)          |         |
| Physical activity, n (%)       |                     |                                      |                       |                        | < 0.001 |
| Inactive                       | 6,677 (17.45)       | 2,329 (21.39)                        | 1,681 (16.85)         | 2,667 (15.71)          |         |
| Insufficiently active          | 5,548 (17.92)       | 1,540 (16.56)                        | 1,499 (18.54)         | 2,509 (18.29)          |         |
| Sufficiently active            | 19,207 (64.63)      | 5,127 (62.05)                        | 5,007 (64.61)         | 9,073 (66.00)          |         |

\* Data are presented incorporating sample weights and adjusted for clusters and strata

of the complex sample design of the National Health and Nutrition Examination

Survey (2003-2018).

† Values are presented as mean  $\pm$  SE for continuous variables and unweighted numbers (weighted %) for categorical variables.

Abbreviations: AA, Associate of Arts; BMI, body mass index
